# Supplementary material for: An Interspecies Comparative Analysis of the Predicted Secretomes of the Necrotrophic Plant Pathogens Sclerotinia sclerotiorum and Botrytis cinerea
Source: PLoS One. 2015 Jun 24;10(6):e0130534. doi: 10.1371/journal.pone.0130534 (PMC4480369; doi:10.1371/journal.pone.0130534)
Supplement: S2 File — (XLSX) [file pone.0130534.s002.xlsx]

## Sheet: Table 1
Total Secretome	secreted	gpi	aa1	prelen	siglen	maturelen	numcs	numrs	TMs	TMpos	RADAR	WoLFPSORT	[HK]DEL	bipartite_NLS	NES	PFAM	KOG	CDD
BC1G_00003	Y	-	M	323	21	302	4	8	0	--	2	extr=26	-	-	0	-	-	cd01837,cd01846
BC1G_00022	-	Y	M	94	18	76	3	0	2	7--24 71--93	-	plas=13	-	-	0	-	-	-
BC1G_00025	Y	-	M	31	26	5	0	0	0	--	-	mito=16.5	-	-	0	-	-	-
BC1G_00048	Y	-	M	595	24	571	2	21	1	7--29	3	extr=24	-	-	0	pfam00264	-	-
BC1G_00061	Y	-	M	187	32	155	2	5	0	--	-	extr=12	-	-	0	pfam04117	KOG1944	-
BC1G_00097	Y	-	M	513	32	481	7	25	1	13--35	3	mito=7	-	-	0	pfam11927	-	-
BC1G_00109	Y	-	M	283	18	265	1	1	0	--	2	extr=26	-	-	1	pfam12138	-	-
BC1G_00149	Y	-	M	63	18	45	0	2	1	7--29	2	extr=20	-	-	0	-	-	-
BC1G_00156	Y	-	M	92	20	72	0	4	0	--	2	plas=9	-	-	1	pfam04479	-	-
BC1G_00198	Y	-	M	516	21	495	5	19	0	--	3	extr=23	-	-	1	pfam06824	-	COG3538
BC1G_00201	Y	-	M	392	20	372	32	39	0	--	14	extr=14	-	-	0	-	-	-
BC1G_00220	-	Y	M	114	20	94	0	2	0	--	3	extr=16	-	-	0	-	-	-
BC1G_00226	Y	-	M	432	18	414	2	9	0	--	2	extr=25	-	-	0	-	-	-
BC1G_00230	Y	-	M	380	19	361	6	7	0	--	4	extr=27	-	-	0	pfam00295	-	COG5434,PLN02155,PLN02188,PLN02218,PLN03003,PLN03010
BC1G_00233	Y	-	M	589	21	568	13	8	0	--	4	extr=23	-	-	2	-	-	-
BC1G_00240	Y	-	M	665	25	640	9	16	0	--	2	extr=23	-	-	2	pfam00295,pfam04063	KOG2973	COG5434,PLN02155,PLN02188,PLN02218,PLN02793,PLN03003,PLN03010
BC1G_00245	Y	-	M	787	17	770	3	29	0	--	7	extr=27	-	-	1	pfam07971	-	COG3537,TIGR01180
BC1G_00246	Y	-	M	181	19	162	3	3	0	--	2	extr=19	-	-	0	-	-	-
BC1G_00257	Y	-	M	543	22	521	4	27	0	--	2	extr=11	-	-	0	-	-	PLN03153
BC1G_00279	Y	-	M	390	23	367	3	12	0	--	2	extr=26	-	-	0	-	-	-
BC1G_00280	Y	-	M	525	23	502	6	17	1	7--29	2	extr=25	-	-	1	pfam00135,pfam07859	KOG1515,KOG1516,KOG4389	COG0657,COG2272,cd00312
BC1G_00308	Y	-	M	327	18	309	7	6	0	--	2	extr=24	-	-	0	pfam00657	-	cd01821
BC1G_00356	Y	-	M	65	26	39	1	3	0	--	-	mito=11	-	-	0	-	-	-
BC1G_00376	Y	-	M	521	19	502	3	19	0	--	2	extr=27	-	-	0	pfam01735	KOG1325	cd00147,cd07200,cd07202,cd07203,smart00022
BC1G_00384	Y	-	M	506	17	489	5	15	0	--	3	extr=24	-	-	0	pfam00450	KOG1282	COG2939,PTZ00472
BC1G_00409	Y	-	M	391	20	371	6	4	0	--	2	extr=25	-	-	1	pfam00722	-	COG2273,PLN03161,cd00413,cd02175,cd02176,cd02183
BC1G_00417	Y	-	M	465	23	442	8	28	0	--	2	extr=13	-	-	0	pfam01764	-	cd00519,cd00741
BC1G_00426	Y	-	M	356	18	338	5	16	0	--	2	cyto=12.5	-	-	0	-	-	cd05262
BC1G_00448	Y	-	M	722	23	699	8	20	0	--	3	extr=27	-	-	1	-	-	-
BC1G_00455	Y	-	M	530	20	510	2	14	0	--	2	extr=25	-	-	0	pfam01532	KOG2204,KOG2429,KOG2430,KOG2431	PTZ00470
BC1G_00464	Y	-	M	413	17	396	7	25	0	--	2	cysk=12	-	-	0	pfam00069	KOG0032,KOG0033,KOG0192,KOG0198,KOG0575,KOG0580,KOG0581,KOG0582,KOG0583,KOG0585,KOG0586,KOG0589,KOG0591,KOG0592,KOG0593,KOG0594,KOG0595,KOG0596,KOG0597,KOG0598,KOG0599,KOG0600,KOG0603,KOG0604,KOG0607,KOG0612,KOG0615,KOG0658,KOG0659,KOG0660,KOG0661,KOG0663,KOG0667,KOG0668,KOG0669,KOG0670,KOG0694,KOG0983,KOG0984,KOG0986,KOG1006,KOG1027,KOG1035,KOG1151,KOG1164,KOG1187,KOG1989,KOG2345,KOG4250,KOG4279…	COG0515,PLN00009,PTZ00024,PTZ00036,cd00180,cd05118,cd05122,cd05123,cd05572,cd05573,cd05574,cd05577,cd05578,cd05579,cd05581,cd05583,cd05600,cd05601,cd05605,cd05606,cd05607,cd05608,cd05611,cd05613,cd05614,cd05630,cd05633,cd06605,cd06606,cd06610,cd06612,cd06618,cd06620,cd06621,cd06622,cd06623,cd06626,cd06627,cd06629,cd06630,cd06632,cd06917,cd07831,cd07832,cd07833,cd07834,cd07835,cd07836,cd07837,cd07…
BC1G_00478	Y	-	M	249	27	222	1	17	1	13--35	-	cyto=9.5	-	-	0	pfam09802	KOG4699	COG5538
BC1G_00493	-	Y	M	197	18	179	1	0	0	--	2	extr=25	-	-	0	-	-	-
BC1G_00497	-	Y	M	301	19	282	4	0	0	--	4	extr=26	-	-	0	pfam10342	-	-
BC1G_00501	Y	-	M	248	22	226	2	7	1	5--27	-	extr=27	-	-	1	pfam00135	KOG1516,KOG4389	COG2272,cd00312
BC1G_00514	Y	-	M	182	19	163	4	5	0	--	-	extr=25	-	-	0	-	-	-
BC1G_00529	Y	-	M	233	22	211	7	5	0	--	-	extr=26	-	-	0	-	-	-
BC1G_00545	Y	-	M	441	18	423	4	11	0	--	2	extr=27	-	-	1	pfam00026	KOG1339	cd05471,cd05474,cd05478
BC1G_00570	Y	-	M	71	35	36	2	2	1	5--27	-	cyto=10.5	-	-	0	-	-	-
BC1G_00572	Y	-	M	275	22	253	3	10	0	--	2	extr=25	-	-	0	-	-	-
BC1G_00576	Y	-	M	353	22	331	3	5	0	--	2	extr=26	-	-	0	pfam00331	-	COG3693,smart00633
BC1G_00594	Y	-	M	248	18	230	2	2	0	--	3	extr=26	-	-	0	pfam01670	-	PRK06215
BC1G_00598	Y	-	M	174	24	150	2	4	1	7--29	3	extr=22	-	-	0	-	-	-
BC1G_00612	Y	-	M	561	17	544	13	4	0	--	5	extr=17	-	-	0	pfam09792	-	-
BC1G_00617	Y	-	M	348	19	329	2	10	0	--	3	extr=27	-	-	1	pfam01095	-	COG4677,PLN02170,PLN02176,PLN02197,PLN02201,PLN02217,PLN02301,PLN02304,PLN02313,PLN02314,PLN02416,PLN02432,PLN02468,PLN02480,PLN02484,PLN02488,PLN02497,PLN02506,PLN02634,PLN02665,PLN02671,PLN02682,PLN02698,PLN02708,PLN02713,PLN02745,PLN02773,PLN02916,PLN02933,PLN02990,PLN02995,PLN03043
BC1G_00624	-	Y	M	232	20	212	4	3	0	--	2	extr=22	-	-	0	-	-	-
BC1G_00639	Y	-	M	540	18	522	10	9	0	--	3	extr=25	-	-	0	pfam07519	-	-
BC1G_00642	Y	-	M	424	18	406	5	7	0	--	3	extr=27	-	-	0	pfam00150	-	COG2730
BC1G_00660	Y	-	M	795	28	767	7	30	1	7--29	4	extr=24	-	-	0	pfam07217	-	-
BC1G_00689	Y	-	M	677	18	659	14	15	0	--	2	extr=26	-	-	0	-	KOG3770	cd00842
BC1G_00693	Y	-	M	420	29	391	6	25	1	5--24	2	extr=17	-	-	0	-	-	-
BC1G_00704	Y	-	M	543	23	520	10	35	0	--	2	nucl=7	-	-	1	-	-	-
BC1G_00721	Y	-	M	108	24	84	1	11	0	--	3	mito=7	-	-	1	-	-	-
BC1G_00729	Y	-	M	453	30	423	0	31	1	17--39	3	extr=17	-	-	0	-	-	-
BC1G_00732	Y	-	M	57	18	39	0	2	0	--	-	extr=14	-	-	0	-	-	-
BC1G_00750	Y	-	M	516	19	497	5	18	0	--	2	extr=27	-	-	0	pfam00135,pfam07859	KOG1515,KOG1516,KOG4389	COG0657,COG2272,cd00312
BC1G_00796	Y	-	M	157	21	136	4	7	1	7--29	2	mito=10.5	-	-	0	-	-	-
BC1G_00827	Y	-	M	53	23	30	0	5	1	10--32	-	mito=13	-	-	0	-	-	-
BC1G_00833	Y	-	M	82	26	56	0	6	0	--	2	extr=13	-	-	0	-	-	-
BC1G_00837	Y	-	M	179	27	152	2	3	0	--	2	extr=19	-	-	0	-	-	-
BC1G_00878	Y	-	M	510	21	489	4	13	0	--	3	extr=26	-	-	0	pfam01425	KOG1211,KOG1212	COG0154,PLN02722,PRK00012,PRK05962,PRK06061,PRK06102,PRK06707,PRK07056,PRK07139,PRK07235,PRK07487,PRK07488,PRK08137,PRK08186,PRK08310,PRK09201,PRK11910,TIGR00132,TIGR02713,TIGR02715
BC1G_00879	Y	-	M	444	18	426	4	12	0	--	2	extr=15	-	-	1	pfam04185	-	COG3511,TIGR03396,TIGR03397
BC1G_00882	-	Y	M	409	17	392	6	3	0	--	9	extr=25	-	-	0	-	-	-
BC1G_00887	Y	-	M	160	16	144	1	8	0	--	2	extr=9	-	-	0	-	-	-
BC1G_00888	Y	-	M	32	22	10	0	0	1	5--27	-	extr=9	-	-	0	-	-	-
BC1G_00895	Y	-	M	618	23	595	38	11	1	7--29	4	extr=26	-	-	0	pfam01522	-	COG0726,TIGR02764,TIGR02873,TIGR02884,TIGR03006,cd10585,cd10917,cd10918,cd10938,cd10941,cd10943,cd10944,cd10946,cd10947,cd10948,cd10949,cd10950,cd10951,cd10952,cd10953,cd10954,cd10955,cd10956,cd10958,cd10959,cd10960,cd10962,cd10967,cd10970,cd11618
BC1G_00896	Y	-	M	155	20	135	4	3	0	--	2	extr=23	-	-	0	-	-	-
BC1G_00912	Y	-	M	329	17	312	1	8	0	--	2	extr=25	-	-	0	pfam00544	-	COG3866,smart00656
BC1G_00919	Y	-	M	216	26	190	2	6	0	--	4	E.R.=8	-	-	0	-	-	-
BC1G_00922	Y	-	M	145	19	126	4	4	0	--	-	extr=24	-	-	0	pfam03443	-	-
BC1G_00958	Y	-	M	219	19	200	7	12	0	--	-	extr=18	-	-	1	-	-	-
BC1G_00959	Y	-	M	152	22	130	4	7	0	--	-	extr=14	-	-	0	-	-	-
BC1G_00960	Y	-	M	188	21	167	4	6	0	--	-	extr=22	-	-	0	-	-	-
BC1G_00970	Y	-	M	150	21	129	2	6	0	--	-	mito=13	-	-	0	-	-	-
BC1G_00977	Y	-	M	173	16	157	0	1	0	--	2	extr=26	-	-	2	pfam12296	-	-
BC1G_00978	Y	-	M	587	19	568	6	27	0	--	2	extr=22	-	-	0	pfam09286	-	COG4934,cd04056,cd11377,smart00944
BC1G_00991	Y	-	M	360	18	342	3	11	0	--	2	extr=20	-	-	2	pfam00248	KOG1575,KOG1577	COG0656,COG0667,COG1453,COG4989,PRK10376,PRK11172,PRK11565,cd06660
BC1G_00997	Y	-	M	96	18	78	1	3	0	--	-	extr=17	-	-	1	pfam00248	KOG1577	COG0656,PRK11172,PRK11565,cd06660
BC1G_01000	Y	-	M	353	18	335	10	10	0	--	2	extr=25	-	-	0	pfam00264	-	-
BC1G_01003	Y	-	M	145	20	125	8	3	1	7--29	2	extr=18	-	-	1	-	-	-
BC1G_01008	Y	-	M	398	22	376	4	5	0	--	3	extr=25	-	-	0	pfam01670	-	-
BC1G_01009	Y	-	M	178	23	155	4	6	0	--	-	extr=15	-	-	1	-	-	-
BC1G_01012	Y	-	M	98	18	80	8	3	0	--	2	extr=20	-	-	0	pfam06766	-	-
BC1G_01013	Y	-	M	249	20	229	0	14	0	--	8	mito=12	-	-	0	-	-	-
BC1G_01015	Y	-	M	140	18	122	4	4	0	--	2	extr=26	-	-	0	-	-	-
BC1G_01016	Y	-	M	202	19	183	4	2	0	--	-	extr=25	-	-	0	-	-	-
BC1G_01025	Y	-	M	73	20	53	1	3	0	--	-	extr=13	-	-	0	-	-	-
BC1G_01026	Y	-	M	595	20	575	6	7	0	--	3	extr=26	-	-	1	pfam09286	-	COG4934,cd04056,cd11377,smart00944
BC1G_01027	Y	-	M	546	21	525	6	16	0	--	3	extr=17	-	-	0	pfam00450	KOG1282,KOG1283	COG2939,PLN02209,PLN03016,PTZ00472
BC1G_01031	Y	-	M	360	18	342	2	8	0	--	2	extr=26	-	-	0	pfam03022	-	-
BC1G_01033	Y	-	M	812	24	788	10	22	0	--	2	extr=26	-	-	1	pfam12708	-	-
BC1G_01036	Y	-	M	33	15	18	0	0	0	--	-	nucl=6	-	-	0	-	-	-
BC1G_01037	Y	-	M	453	31	422	10	20	1	7--29	3	extr=15	-	-	2	pfam00067	KOG0156,KOG0157,KOG0158,KOG0159,KOG0684	COG2124,PLN02302,PLN02774,PTZ00404
BC1G_01059	Y	-	M	254	18	236	20	5	0	--	-	extr=25	-	-	0	-	-	-
BC1G_01064	Y	-	M	869	19	850	11	10	0	--	4	extr=23	-	-	1	-	-	-
BC1G_01073	Y	-	M	724	18	706	10	35	0	--	3	extr=22	-	-	0	pfam09286	-	COG4934,cd04056,cd11377,smart00944
BC1G_01075	Y	-	M	39	16	23	2	0	0	--	-	extr=17	-	-	0	-	-	-
BC1G_01077	Y	-	M	48	15	33	0	0	0	--	-	extr=21	-	-	0	-	-	-
BC1G_01080	Y	-	M	244	19	225	1	1	0	--	2	extr=18	-	-	3	pfam12138	-	-
BC1G_01108	Y	-	M	631	21	610	7	25	0	--	-	extr=8	-	-	0	pfam00501	KOG1175,KOG1176,KOG1177,KOG1179	COG0318,COG0365,COG1021,COG1022,PLN02330,PLN02479,PLN03102,PRK03640,PRK05605,PRK05677,PRK05852,PRK06087,PRK06145,PRK06155,PRK06164,PRK06178,PRK06187,PRK06710,PRK06839,PRK07059,PRK07470,PRK07656,PRK07786,PRK07867,PRK07868,PRK08008,PRK08162,PRK08279,PRK08315,PRK08316,PRK08751,PRK08974,PRK09088,PRK12316,PRK12583,PRK13382,PRK13388,TIGR01923,TIGR02262
BC1G_01120	Y	-	M	174	34	140	0	18	1	10--32	2	E.R.=6	-	-	0	-	-	-
BC1G_01121	Y	-	M	91	23	68	0	9	1	5--27	-	plas=7	-	-	0	-	-	-
BC1G_01127	Y	-	M	612	37	575	4	31	0	--	2	cyto=13	-	-	1	pfam01866	KOG2648	COG1736,TIGR00272,TIGR00322
BC1G_01138	-	Y	M	178	21	157	0	4	1	158--177	2	plas=12	-	-	1	-	-	-
BC1G_01139	Y	-	M	52	23	29	0	3	0	--	-	plas=10	-	-	0	-	-	-
BC1G_01152	Y	-	M	479	18	461	5	8	0	--	4	extr=26	-	-	0	-	-	-
BC1G_01169	Y	-	M	152	20	132	4	5	0	--	2	extr=17	-	-	0	-	-	-
BC1G_01181	-	Y	M	193	22	171	0	0	0	--	3	extr=17	-	-	0	-	-	-
BC1G_01204	Y	-	M	816	16	800	32	20	0	--	4	extr=27	-	-	1	pfam00187,pfam07250,pfam09118	-	cd00035,cd02851,cd11618,smart00270
BC1G_01208	-	Y	M	190	17	173	8	3	0	--	2	extr=24	-	-	0	-	-	-
BC1G_01218	-	Y	M	514	20	494	4	11	1	5--27	2	extr=27	-	-	1	pfam00026	KOG1339	PTZ00013,PTZ00147,PTZ00165,cd05470,cd05471,cd05473,cd05474,cd05476,cd05477,cd05478,cd05485,cd05486,cd05487,cd05488,cd05490,cd06096,cd06097,cd06098
BC1G_01234	Y	-	M	376	20	356	5	6	0	--	2	extr=25	-	-	0	pfam00295	-	COG5434,PLN02155,PLN02188,PLN02218,PLN02793,PLN03003,PLN03010
BC1G_01277	Y	-	M	168	29	139	2	5	1	15--37	3	mito=13	-	-	0	-	-	-
BC1G_01282	Y	-	M	158	28	130	2	10	1	10--32	2	cyto_mito=8.333	-	-	0	-	-	-
BC1G_01286	Y	-	M	245	20	225	2	5	0	--	2	extr=26	-	-	0	pfam00450	KOG1282,KOG1283	COG2939,PLN02209,PLN03016,PTZ00472
BC1G_01319	Y	-	M	89	18	71	1	4	0	--	2	plas=18	-	-	0	-	-	-
BC1G_01350	Y	-	M	498	33	465	8	13	1	13--32	2	extr=11	-	-	1	-	KOG2246	-
BC1G_01351	Y	-	M	446	25	421	4	18	1	9--27	2	extr=16	-	-	1	-	-	-
BC1G_01364	Y	-	M	313	23	290	8	10	0	--	4	mito=8.5	-	-	1	-	-	-
BC1G_01367	Y	-	M	488	20	468	10	13	0	--	3	extr=22	-	-	0	pfam12697	-	-
BC1G_01368	Y	-	M	859	38	821	8	57	1	16--33	3	plas=14	-	-	0	pfam08241,pfam08242,pfam11899,pfam12847,pfam13847	-	COG2226,COG5379,cd02440
BC1G_01391	Y	-	M	85	29	56	1	2	0	--	-	E.R.=8	-	-	0	-	-	-
BC1G_01392	Y	-	M	50	25	25	0	2	0	--	-	extr=11	-	-	0	-	-	-
BC1G_01393	Y	-	M	188	18	170	0	5	0	--	2	extr=26	-	-	1	pfam13577	-	-
BC1G_01397	Y	-	M	228	16	212	2	5	0	--	-	extr=24	-	-	1	pfam00026	KOG1339	PTZ00013,PTZ00165,cd05470,cd05471,cd05472,cd05474,cd05476,cd05477,cd05478,cd05485,cd05486,cd05487,cd05488,cd05490,cd06097,cd06098
BC1G_01414	-	Y	M	96	26	70	0	5	0	--	-	extr=17	-	-	1	-	-	-
BC1G_01438	Y	-	M	53	24	29	0	4	1	10--29	-	mito=10	-	-	0	-	-	-
BC1G_01444	Y	-	M	90	20	70	10	2	0	--	2	extr=25	-	-	0	-	-	-
BC1G_01472	Y	-	M	325	20	305	4	10	0	--	-	extr=22	-	-	1	-	-	-
BC1G_01529	Y	-	M	446	25	421	4	10	1	5--24	3	extr=27	-	-	0	-	-	-
BC1G_01556	Y	-	M	99	19	80	3	4	0	--	-	extr=10	-	-	0	-	-	-
BC1G_01558	Y	-	M	51	18	33	1	0	0	--	-	nucl=8	-	-	0	-	-	-
BC1G_01612	Y	-	M	250	18	232	7	7	0	--	2	extr=26	-	-	0	-	-	-
BC1G_01615	Y	-	M	586	19	567	10	15	0	--	4	extr=26	-	-	1	pfam07519	-	-
BC1G_01617	Y	-	M	472	19	453	10	11	0	--	2	extr=27	-	-	2	pfam00295	-	PLN02155,PLN02188,PLN02218,PLN02793,PLN03003,PLN03010
BC1G_01628	Y	-	M	442	19	423	4	13	0	--	4	extr=20	-	-	1	pfam01328	-	-
BC1G_01630	Y	-	M	675	19	656	6	22	0	--	2	extr=22	-	-	1	pfam00732,pfam05199	KOG1238	COG2303,PLN02785,PRK02106,TIGR01810,TIGR03970
BC1G_01659	Y	-	M	65	20	45	0	6	1	4--23	-	mito=12	-	-	0	-	-	-
BC1G_01661	Y	-	M	65	20	45	0	6	1	4--23	-	mito=12	-	-	0	-	-	-
BC1G_01674	Y	-	M	297	19	278	7	1	0	--	3	extr=24	-	-	0	pfam03067	-	-
BC1G_01702	Y	-	M	556	31	525	5	39	1	13--35	4	extr=10	-	-	0	pfam00067	KOG0156,KOG0157,KOG0158,KOG0159,KOG0684	COG2124,PLN00110,PLN00168,PLN02169,PLN02183,PLN02196,PLN02290,PLN02302,PLN02426,PLN02500,PLN02687,PLN02738,PLN02936,PLN02966,PLN02987,PLN03018,PLN03112,PLN03195,PLN03234,PTZ00404
BC1G_01719	Y	-	M	823	16	807	8	15	0	--	4	extr=26	-	-	0	pfam00732,pfam05199	KOG1238	COG2303,PRK02106,TIGR01810,TIGR03970,cd09630
BC1G_01778	Y	-	M	487	17	470	11	4	0	--	3	extr=27	-	-	1	pfam00331,pfam00734	-	COG3693,smart00236,smart00633
BC1G_01789	Y	-	M	612	18	594	5	21	0	--	2	extr=26	-	-	0	pfam00732,pfam05199	KOG1238	COG2303,PLN02785,PRK02106,TIGR01810,TIGR03970
BC1G_01791	Y	-	M	610	30	580	13	10	1	13--35	3	extr=27	-	-	0	pfam00187,pfam01565,pfam08031	-	COG0277,cd00035,cd06921,cd11618,smart00270
BC1G_01794	Y	-	M	441	20	421	4	8	0	--	3	extr=26	-	-	2	pfam00026	KOG1339	PTZ00165,cd05471,cd05472,cd05474,cd05476,cd05477,cd05478,cd05485,cd05486,cd05487,cd05488,cd05490,cd06097,cd06098
BC1G_01803	Y	-	M	649	17	632	9	19	0	--	3	extr=23	-	-	0	pfam09286	-	COG4934,cd04056,cd11377,smart00944
BC1G_01826	Y	-	M	84	20	64	1	3	1	9--31	-	plas=12	-	-	1	-	-	-
BC1G_01872	Y	-	M	348	20	328	4	2	0	--	3	extr=25	-	-	0	-	-	-
BC1G_01874	Y	-	M	496	21	475	9	11	0	--	3	extr=22	-	-	0	pfam10287,pfam10290	-	-
BC1G_01886	Y	-	M	76	15	61	2	2	0	--	-	extr=18	-	-	0	-	-	-
BC1G_01893	Y	-	M	508	18	490	8	13	0	--	3	cyto_nucl=7.5	Y	-	0	pfam07915	KOG3394	-
BC1G_01896	Y	-	M	336	20	316	16	6	0	--	4	extr=23	-	-	1	-	-	-
BC1G_01901	-	Y	M	227	19	208	0	3	0	--	3	extr=24	-	-	0	-	-	-
BC1G_01903	Y	-	M	116	22	94	2	1	1	7--29	-	extr=23	-	-	0	pfam03198	-	-
BC1G_01923	Y	-	M	478	20	458	2	14	0	--	3	extr=27	-	-	1	pfam00295	-	PLN02793
BC1G_01935	Y	-	M	117	16	101	7	3	0	--	-	extr=12	-	-	0	-	-	-
BC1G_01943	Y	-	M	445	22	423	6	21	0	--	2	mito=9	-	-	0	pfam00743,pfam13738	KOG1399	COG2072,PLN02172
BC1G_01963	Y	-	M	360	18	342	2	17	0	--	7	extr=14	-	-	1	-	-	-
BC1G_02003	Y	-	M	375	22	353	7	4	0	--	2	extr=24	-	-	1	pfam00295	-	COG5434,PLN02155,PLN02218,PLN02793,PLN03003,PLN03010
BC1G_02011	Y	-	M	330	20	310	4	3	0	--	2	extr=26	-	-	0	-	-	COG4124
BC1G_02012	Y	-	M	266	19	247	6	5	0	--	3	extr=25	-	-	0	-	-	-
BC1G_02016	Y	-	M	523	19	504	4	11	0	--	3	extr=24	-	-	0	pfam00135	KOG1516,KOG4389	COG0657,COG2272,cd00312
BC1G_02021	Y	-	M	628	22	606	4	19	0	--	3	extr=25	-	-	0	pfam00732,pfam05199	KOG1238	COG2303,PLN02785,PRK02106,TIGR01810,TIGR03970
BC1G_02029	Y	-	M	124	21	103	2	8	1	7--29	-	plas=8	-	-	0	-	-	-
BC1G_02034	Y	-	M	210	19	191	4	8	0	--	-	extr=11	-	-	0	-	-	-
BC1G_02036	Y	-	M	350	18	332	4	6	0	--	2	extr=26	-	-	0	pfam00150	-	COG3934
BC1G_02052	Y	-	M	205	20	185	3	10	0	--	-	extr=8	-	-	0	-	-	-
BC1G_02060	Y	-	M	162	19	143	6	3	0	--	2	extr=25	-	-	0	-	-	-
BC1G_02114	-	Y	M	272	19	253	3	3	0	--	5	extr=26	-	-	0	-	-	-
BC1G_02126	Y	-	M	106	46	60	0	8	1	26--48	2	extr=9	-	-	1	-	-	-
BC1G_02139	Y	-	M	178	19	159	4	8	0	--	-	extr=14	-	-	0	-	-	-
BC1G_02154	Y	-	M	198	19	179	1	2	0	--	2	extr=13	-	-	1	pfam12296	-	-
BC1G_02156	Y	-	M	58	25	33	1	1	1	12--34	-	plas=10	-	-	0	-	-	-
BC1G_02163	Y	-	M	137	18	119	4	3	0	--	-	extr=26	-	-	0	pfam07249	-	-
BC1G_02186	Y	-	M	82	13	69	2	1	0	--	2	mito=15.5	-	-	1	-	-	-
BC1G_02210	Y	-	M	144	22	122	7	15	0	--	-	mito=10	-	-	1	-	-	-
BC1G_02222	Y	-	M	45	21	24	0	1	0	--	-	cyto_nucl=12	-	-	1	-	-	-
BC1G_02223	Y	-	M	531	19	512	6	6	0	--	5	cyto=14	Y	-	0	pfam00085,pfam01216,pfam13848	KOG0190,KOG0191,KOG0907,KOG0908,KOG0910,KOG0912,KOG1731,KOG4277	COG3118,PRK09381,PRK10996,PTZ00051,PTZ00102,PTZ00443,TIGR01068,TIGR01126,TIGR01130,cd01659,cd02947,cd02956,cd02961,cd02981,cd02982,cd02992,cd02994,cd02995,cd02996,cd02997,cd02998,cd03000,cd03001,cd03002,cd03003,cd03004,cd03005,cd03069
BC1G_02278	-	Y	M	323	18	305	6	6	0	--	4	extr=26	-	-	0	-	-	-
BC1G_02292	Y	-	M	143	21	122	1	10	1	4--26	2	extr=10	-	-	0	-	-	-
BC1G_02294	Y	-	M	520	30	490	7	19	0	--	-	E.R.=9	-	-	1	pfam11051	-	-
BC1G_02299	Y	-	M	84	25	59	6	1	1	10--29	-	extr=15	-	-	0	-	-	-
BC1G_02302	Y	-	M	73	21	52	0	6	0	--	-	mito=13.5	-	-	0	-	-	-
BC1G_02314	Y	-	M	506	19	487	6	18	0	--	3	extr=25	-	-	0	pfam00328	KOG1382	cd07061
BC1G_02326	-	Y	M	460	19	441	4	3	0	--	6	extr=27	-	-	0	-	-	-
BC1G_02330	Y	-	M	262	21	241	1	15	0	--	2	cyto=9	-	-	1	-	-	-
BC1G_02332	-	Y	M	72	24	48	1	1	2	7--29 49--71	-	plas=17	-	-	0	-	-	-
BC1G_02333	Y	-	M	401	22	379	16	8	0	--	3	extr=26	-	-	0	pfam00686	-	PLN02950,cd05467,cd05807,cd05808,cd05809,cd05810,cd05811,cd05815,cd05816,cd05817,cd05818,cd05820,smart01065
BC1G_02352	Y	-	M	361	17	344	0	11	0	--	5	mito=10	-	-	1	-	-	-
BC1G_02354	Y	-	M	234	24	210	0	20	1	7--29	3	extr=15	-	-	0	-	-	-
BC1G_02364	Y	-	M	777	18	759	4	23	0	--	3	extr=21	-	-	0	pfam00933,pfam01915,pfam14310	-	COG1472,PLN03080,PRK15098
BC1G_02365	Y	-	M	417	17	400	5	11	0	--	3	extr=27	-	-	0	-	-	COG2730
BC1G_02388	Y	-	M	223	20	203	8	3	0	--	2	extr=23	-	-	0	-	-	-
BC1G_02410	Y	-	M	1007	18	989	6	29	0	--	3	extr=26	-	-	1	pfam01301,pfam10435,pfam13363,pfam13364	KOG0496	COG1874,PLN03059,smart01029
BC1G_02416	Y	-	M	181	33	148	4	7	1	12--31	-	E.R.=8	-	-	0	-	-	-
BC1G_02451	Y	-	M	121	21	100	0	9	1	7--25	-	nucl=10	-	-	0	-	-	-
BC1G_02480	Y	-	M	67	26	41	0	0	0	--	-	extr=19	-	-	0	-	-	-
BC1G_02483	-	Y	M	234	23	211	12	1	0	--	2	extr=26	-	-	1	-	-	-
BC1G_02486	Y	-	M	536	20	516	10	10	0	--	3	extr=26	-	-	0	pfam07519	-	-
BC1G_02487	Y	-	M	524	20	504	2	10	0	--	2	extr=27	-	-	0	pfam00135	KOG1516,KOG4389	COG2272,cd00312
BC1G_02492	Y	-	M	409	23	386	3	4	0	--	4	extr=23	-	-	0	pfam11790	-	-
BC1G_02499	Y	-	M	120	20	100	6	4	1	5--24	-	extr=21	-	-	1	-	-	-
BC1G_02517	-	Y	M	241	18	223	0	2	0	--	2	extr=23	-	-	0	-	-	-
BC1G_02530	Y	-	M	505	30	475	7	30	1	7--29	2	extr=8	-	-	0	pfam00067	KOG0156,KOG0157,KOG0158,KOG0159,KOG0684	COG2124,PLN00110,PLN00168,PLN02169,PLN02183,PLN02196,PLN02290,PLN02302,PLN02394,PLN02426,PLN02655,PLN02687,PLN02738,PLN02936,PLN02966,PLN02971,PLN02987,PLN03018,PLN03112,PLN03195,PLN03234,PTZ00404
BC1G_02541	Y	-	M	269	17	252	4	1	0	--	2	extr=20	-	-	0	pfam03443	-	-
BC1G_02576	Y	-	M	177	18	159	3	8	0	--	2	cyto=7.5	-	-	0	-	-	-
BC1G_02577	Y	-	M	1253	20	1233	15	63	0	--	3	mito=15.5	-	-	2	pfam00586,pfam02769,pfam13507	KOG1907	COG0046,COG0047,PHA03366,PLN03206,PRK01175,PRK01213,PRK03619,PRK05297,PRK14090,TIGR01735,TIGR01736,TIGR01737,TIGR01739,TIGR01857,cd00396,cd01740,cd02193,cd02203,cd02204
BC1G_02591	Y	-	M	454	23	431	7	15	0	--	2	extr=22	-	-	0	pfam02065	KOG2366	COG3345,PLN02229,PLN02692,PLN02808,PLN02899,PLN03231
BC1G_02622	Y	-	M	231	23	208	1	4	1	12--34	-	extr=25	-	-	0	pfam04573	KOG3372	-
BC1G_02623	Y	-	M	427	25	402	9	13	0	--	2	extr=27	-	-	1	pfam00128,pfam09260	KOG0471	COG0366,cd00551,cd11315,cd11319,cd11320,cd11337,cd11338,cd11339,cd11340,smart00642
BC1G_02640	Y	-	M	513	29	484	5	33	1	9--31	2	extr=12	-	-	1	pfam00067	KOG0156,KOG0157,KOG0158,KOG0159,KOG0684	COG2124,PLN00110,PLN00168,PLN02169,PLN02183,PLN02196,PLN02290,PLN02302,PLN02394,PLN02426,PLN02500,PLN02655,PLN02687,PLN02738,PLN02936,PLN02966,PLN02971,PLN02987,PLN03018,PLN03112,PLN03195,PLN03234,PTZ00404
BC1G_02643	Y	-	M	141	19	122	8	3	0	--	-	extr=25	-	-	0	-	-	-
BC1G_02658	Y	-	M	86	23	63	0	5	0	--	-	mito=14	-	-	0	-	-	-
BC1G_02662	Y	-	M	289	32	257	4	12	1	13--35	3	E.R.=8	-	-	0	-	-	-
BC1G_02676	Y	-	M	127	25	102	8	5	0	--	-	extr=27	-	-	1	-	-	-
BC1G_02701	Y	-	M	139	22	117	10	2	0	--	2	extr=22	-	-	0	-	-	-
BC1G_02702	Y	-	M	344	16	328	1	15	0	--	6	extr=25	-	-	1	-	KOG0379,KOG4441,KOG4693	COG3055,PHA03098,PRK14131,TIGR03547,TIGR03548
BC1G_02714	Y	-	M	340	19	321	18	4	0	--	3	extr=27	-	-	0	-	-	cd00599,cd06416
BC1G_02721	Y	-	M	410	21	389	6	23	0	--	3	mito=11	-	-	0	-	-	-
BC1G_02731	Y	-	M	756	19	737	9	15	0	--	5	extr=27	-	-	0	pfam12708	-	-
BC1G_02738	Y	-	M	617	23	594	14	7	0	--	6	extr=22	-	-	0	pfam03659	-	cd11573,cd11577
BC1G_02740	Y	-	M	422	19	403	5	10	0	--	2	extr=22	-	-	1	-	-	-
BC1G_02755	Y	-	M	244	20	224	2	7	0	--	-	extr=27	-	-	0	-	-	-
BC1G_02789	Y	-	M	123	16	107	2	10	0	--	-	cyto=12	-	-	0	-	-	-
BC1G_02790	Y	-	M	249	17	232	2	3	0	--	3	extr=22	-	-	0	pfam01828	-	-
BC1G_02803	Y	-	M	58	28	30	0	0	1	13--35	-	extr=12	-	-	0	-	-	-
BC1G_02804	Y	-	M	175	29	146	8	10	1	10--32	2	extr=17	-	-	1	-	-	-
BC1G_02815	Y	-	M	55	23	32	0	3	0	--	-	nucl=10	-	-	1	-	-	-
BC1G_02825	Y	-	M	55	29	26	3	0	1	7--29	-	mito=11	-	-	1	-	-	-
BC1G_02834	Y	-	M	170	19	151	8	3	0	--	-	extr=19	-	-	0	-	-	-
BC1G_02895	Y	-	M	525	20	505	5	22	0	--	4	extr=13	-	-	0	-	-	-
BC1G_02922	Y	-	M	180	20	160	5	3	1	4--26	2	extr=26	-	-	0	-	-	-
BC1G_02929	Y	-	M	339	27	312	3	14	1	13--35	-	mito=12	-	-	1	pfam04488	-	COG3774
BC1G_02944	Y	-	M	587	18	569	9	11	0	--	3	extr=26	-	-	0	pfam09286	-	COG4934,cd04056,cd11377,smart00944
BC1G_02955	Y	-	M	185	32	153	5	8	1	7--29	2	extr=14	-	-	2	pfam11807	-	-
BC1G_02959	Y	-	M	109	22	87	0	22	0	--	2	extr=10	-	-	1	-	-	-
BC1G_02965	Y	-	M	438	19	419	1	13	0	--	3	extr=18	-	-	0	pfam04185	-	-
BC1G_02974	Y	-	M	194	20	174	6	11	0	--	2	mito=10	-	-	0	-	-	-
BC1G_02986	Y	-	M	168	19	149	4	4	0	--	2	extr=26	-	-	0	pfam02221	KOG4680	cd00912,cd00917,smart00737
BC1G_03037	Y	-	M	514	34	480	6	26	0	--	2	mito=9	-	-	0	pfam01266,pfam13738	KOG0029,KOG0685,KOG1399	COG2072,PRK07233
BC1G_03038	Y	-	M	257	19	238	5	3	0	--	4	extr=21	-	-	0	pfam00734	-	smart00236
BC1G_03045	Y	-	M	135	19	116	1	2	0	--	-	extr=26	-	-	1	pfam02089	KOG2541	-
BC1G_03065	Y	-	M	61	20	41	0	0	0	--	-	extr=24	-	-	1	-	-	-
BC1G_03070	Y	-	M	389	17	372	2	3	0	--	3	extr=27	-	-	0	pfam00026	KOG1339	PTZ00013,PTZ00147,PTZ00165,cd05471,cd05472,cd05473,cd05474,cd05476,cd05477,cd05478,cd05485,cd05486,cd05487,cd05488,cd05490,cd06096,cd06097,cd06098
BC1G_03086	Y	-	M	582	20	562	11	12	0	--	3	extr=22	-	-	0	pfam07519	-	-
BC1G_03097	Y	-	M	505	25	480	5	18	0	--	2	extr=26	-	-	0	pfam00135	KOG1516,KOG4389	COG2272,cd00312
BC1G_03107	Y	-	M	153	30	123	3	11	1	15--33	2	mito=9	-	-	0	-	-	-
BC1G_03110	Y	-	M	31	18	13	0	0	0	--	-	extr=8	-	-	0	-	-	-
BC1G_03112	Y	-	M	57	37	20	0	1	1	13--35	-	plas=11	-	-	1	-	-	-
BC1G_03126	Y	-	M	518	24	494	3	27	1	12--34	3	extr=14	-	-	1	-	-	-
BC1G_03179	Y	-	M	783	19	764	6	27	0	--	4	extr=24	-	-	0	pfam00933,pfam01915,pfam14310	-	COG1472,PLN03080,PRK15098
BC1G_03200	Y	-	M	746	25	721	9	35	1	7--29	4	cyto=7	-	-	1	-	-	cd00138
BC1G_03205	Y	-	M	223	18	205	0	4	0	--	2	extr=24	-	-	0	-	-	-
BC1G_03220	Y	-	M	931	21	910	7	34	0	--	3	extr=24	-	-	1	pfam00732,pfam05199	KOG1238	COG2303,PRK02106,TIGR01810,TIGR03970
BC1G_03226	Y	-	M	692	22	670	5	25	1	7--24	2	cyto=8	-	-	1	pfam00175,pfam00258,pfam00667	KOG1158,KOG1159,KOG1160	COG0369,COG0543,COG1018,PLN03115,PLN03116,PRK06214,PRK10953,TIGR01931,TIGR03224,cd00322,cd06182,cd06195,cd06196,cd06199,cd06200,cd06201,cd06202,cd06203,cd06204,cd06206,cd06207,cd06208,cd06221
BC1G_03270	-	Y	M	279	18	261	15	2	0	--	3	extr=25	-	-	0	-	-	-
BC1G_03275	Y	-	M	576	19	557	0	19	0	--	8	extr=16	-	-	0	pfam10281	-	-
BC1G_03277	Y	-	M	178	18	160	8	9	0	--	-	E.R.=8	-	-	0	-	-	-
BC1G_03293	-	Y	M	229	17	212	0	2	1	206--228	4	extr=27	-	-	0	-	-	-
BC1G_03298	Y	-	M	194	17	177	1	4	0	--	3	extr=25	-	-	0	-	KOG3017	cd05380,cd05382,smart00198
BC1G_03303	Y	-	M	214	15	199	1	9	0	--	-	extr=14	-	-	0	pfam04622	KOG4143	-
BC1G_03312	Y	-	M	203	21	182	2	10	0	--	2	extr=16	-	-	0	pfam01105	KOG1690,KOG1691,KOG1692,KOG1693,KOG3287	-
BC1G_03324	Y	-	M	89	27	62	3	4	0	--	-	cyto_nucl=12.5	-	-	1	-	-	-
BC1G_03334	-	Y	M	200	18	182	0	3	0	--	3	extr=26	-	-	0	-	-	-
BC1G_03357	Y	-	M	570	24	546	4	43	0	--	3	plas=16	-	546--562	1	pfam01734,pfam11815	KOG2214	cd07206,cd07229,cd07230,cd07231,cd07232
BC1G_03373	Y	-	M	560	23	537	8	44	1	9--31	3	extr=13	-	-	0	-	-	-
BC1G_03379	Y	-	M	739	21	718	4	28	0	--	4	E.R.=9	-	390--404	1	-	KOG3770	cd00842
BC1G_03381	Y	-	M	117	18	99	4	7	0	--	2	mito=9.5	-	-	0	-	-	-
BC1G_03396	Y	-	M	601	71	530	0	22	1	50--72	3	extr=13	-	-	1	pfam03632,pfam03636	KOG4125	COG1554,PRK13807
BC1G_03406	Y	-	M	277	21	256	1	9	0	--	2	extr=25	-	-	1	pfam01328	-	-
BC1G_03412	Y	-	M	54	26	28	0	0	0	--	-	extr=19	-	-	0	-	-	-
BC1G_03415	Y	-	M	36	17	19	3	2	0	--	-	cyto=8.5	-	-	0	-	-	-
BC1G_03421	Y	-	M	102	31	71	0	12	1	15--34	-	plas=18	-	-	0	-	-	-
BC1G_03464	Y	-	M	444	22	422	11	5	0	--	4	extr=27	-	-	0	pfam00295	-	PLN02155,PLN02188,PLN02218,PLN02793,PLN03003,PLN03010
BC1G_03475	Y	-	M	315	23	292	3	19	0	--	2	nucl=9.5	-	-	0	-	-	-
BC1G_03476	Y	-	M	649	23	626	10	41	0	--	2	extr=7	-	-	1	-	-	-
BC1G_03483	Y	-	M	425	30	395	7	23	0	--	2	extr=9	-	-	1	pfam01073,pfam01124,pfam01370,pfam04321,pfam07993	KOG0747,KOG1371,KOG1430,KOG1502	COG0451,COG1086,COG1087,COG1088,COG1091,COG3686,TIGR01179,TIGR03466,TIGR04180,cd05228,cd05230,cd05232,cd05234,cd05235,cd05238,cd05239,cd05240,cd05246,cd05247,cd05252,cd05253,cd05254,cd05256,cd05257,cd05264,cd05273,cd08946,cd08957,cd09813
BC1G_03518	Y	-	M	178	24	154	2	0	0	--	-	extr=13	-	-	1	-	-	-
BC1G_03525	Y	-	M	313	20	293	0	10	0	--	5	extr=10	-	-	0	-	-	-
BC1G_03541	Y	-	M	64	18	46	0	3	0	--	-	cysk=12	-	-	0	-	-	-
BC1G_03547	Y	-	M	50	28	22	1	1	0	--	-	nucl=14.5	-	-	0	-	-	-
BC1G_03557	Y	-	M	204	18	186	4	5	0	--	2	extr=26	-	-	0	pfam07510	-	-
BC1G_03560	Y	-	M	414	18	396	9	11	0	--	3	extr=25	-	-	1	-	-	-
BC1G_03564	Y	-	M	385	20	365	6	16	1	7--26	2	golg=10	-	-	1	pfam01793	KOG4472	COG5020
BC1G_03567	Y	-	M	1012	18	994	2	25	0	--	5	extr=25	-	-	0	pfam01301,pfam10435,pfam13363,pfam13364	KOG0496	COG1874,PLN03059,smart01029
BC1G_03579	Y	-	M	432	19	413	2	6	0	--	2	extr=26	-	-	1	pfam00026	KOG1339	PTZ00013,PTZ00147,PTZ00165,cd05470,cd05471,cd05473,cd05474,cd05477,cd05478,cd05485,cd05486,cd05487,cd05488,cd05490,cd06097,cd06098
BC1G_03590	Y	-	M	281	19	262	6	4	0	--	2	extr=26	-	-	0	pfam00457,pfam00734	-	-
BC1G_03591	Y	-	M	81	18	63	6	3	0	--	-	extr=19	-	-	0	-	-	-
BC1G_03596	Y	-	M	149	26	123	1	4	0	--	-	extr=23	-	-	0	-	-	-
BC1G_03603	Y	-	M	36	23	13	0	0	1	7--29	-	mito=13	-	-	0	-	-	-
BC1G_03607	Y	-	M	50	19	31	0	0	0	--	-	extr=16	-	-	0	-	-	-
BC1G_03619	Y	-	M	447	22	425	10	7	0	--	2	extr=26	-	-	0	pfam00295	-	COG5434,PLN02188,PLN02218,PLN03003,PLN03010
BC1G_03622	-	Y	M	213	18	195	4	1	0	--	2	extr=14	-	-	0	-	-	-
BC1G_03630	Y	-	M	545	26	519	7	30	1	5--27	3	mito=7	-	-	0	pfam00149	KOG1432	COG0420,cd00840,cd07383,cd07385
BC1G_03670	Y	-	M	264	17	247	3	12	0	--	2	mito=13	-	-	2	pfam12296	-	-
BC1G_03710	Y	-	M	572	19	553	9	16	0	--	3	extr=25	-	-	0	pfam00450	KOG1282,KOG1283	COG2939,PLN02209,PLN03016,PTZ00472
BC1G_03711	Y	-	M	546	15	531	11	12	0	--	3	extr=23	-	-	0	pfam00450,pfam05388	KOG1282,KOG1283	COG2939,PLN02209,PLN03016,PTZ00472
BC1G_03728	Y	-	M	142	20	122	3	13	0	--	-	cysk=9	-	-	2	-	-	-
BC1G_03793	Y	-	M	102	31	71	0	3	1	4--26	2	extr=15	-	-	0	-	-	-
BC1G_03798	Y	-	M	121	19	102	1	11	0	--	-	mito=14	-	-	0	-	-	-
BC1G_03802	Y	-	M	48	18	30	1	4	0	--	-	mito=17	-	-	1	-	-	-
BC1G_03813	Y	-	M	504	22	482	1	11	0	--	3	extr=24	-	-	0	pfam00190,pfam07883	-	COG0662,COG2140,TIGR03404,smart00835
BC1G_03828	Y	-	M	285	24	261	0	29	0	--	2	mito=14	-	-	0	-	-	-
BC1G_03848	-	Y	M	174	22	152	4	0	2	12--34 151--173	2	extr=26	-	-	1	-	-	-
BC1G_03849	Y	-	M	301	17	284	7	3	0	--	3	extr=26	-	-	0	-	-	-
BC1G_03854	-	Y	M	171	18	153	5	1	0	--	2	extr=27	-	-	0	-	-	-
BC1G_03859	Y	-	M	396	45	351	4	13	0	--	2	extr=24	-	-	1	pfam01301	KOG0496	PLN03059
BC1G_03865	Y	-	M	91	20	71	2	3	0	--	2	mito=15	-	-	1	-	-	-
BC1G_03881	Y	-	M	407	24	383	4	11	0	--	2	extr=23	-	-	0	pfam03663	-	COG4833
BC1G_03886	Y	-	M	536	20	516	2	9	0	--	2	extr=26	-	-	0	pfam00135	KOG1516,KOG4389	COG2272,cd00312
BC1G_03893	Y	-	M	487	17	470	9	20	0	--	2	extr=17	-	-	1	pfam00128,pfam09260	KOG0471,KOG2212	COG0296,COG0366,PRK09505,PRK10785,PRK10933,TIGR02402,TIGR02403,cd00551,cd11313,cd11314,cd11315,cd11316,cd11319,cd11320,cd11323,cd11325,cd11328,cd11330,cd11331,cd11332,cd11333,cd11334,cd11337,cd11338,cd11339,cd11340,cd11348,cd11350,cd11352,cd11353,cd11359,smart00642
BC1G_03907	Y	-	M	182	20	162	0	4	1	7--26	-	extr=25	-	-	0	pfam12296	-	-
BC1G_03930	Y	-	M	443	23	420	3	25	1	7--23	2	extr=10	-	-	0	-	-	-
BC1G_03945	Y	-	M	212	23	189	2	14	1	5--22	-	extr=12	-	-	0	pfam00067	KOG0156,KOG0157	-
BC1G_03951	Y	-	M	828	19	809	65	9	0	--	12	extr=25	-	-	0	-	-	-
BC1G_03953	Y	-	M	73	29	44	0	5	1	10--32	-	mito=12.5	-	-	0	-	-	-
BC1G_03954	Y	-	M	39	26	13	0	0	1	5--24	-	cyto=23.5	-	-	0	-	-	-
BC1G_03976	Y	-	M	566	20	546	8	14	0	--	3	extr=25	-	-	1	pfam08386	-	-
BC1G_03977	Y	-	M	183	17	166	4	5	0	--	2	extr=20	-	-	0	-	-	-
BC1G_03986	-	Y	M	191	17	174	10	1	0	--	-	extr=19	-	-	0	-	-	-
BC1G_04003	Y	-	M	199	17	182	0	11	0	--	2	mito=11	-	-	1	-	-	-
BC1G_04010	Y	-	M	424	28	396	0	28	1	15--37	2	extr=11	-	-	0	-	-	-
BC1G_04016	Y	-	M	428	21	407	0	16	1	4--26	2	nucl=12.5	-	-	0	-	-	-
BC1G_04020	Y	-	M	686	23	663	11	24	0	--	2	cyto=8	-	-	0	pfam03894,pfam09363,pfam09364	-	COG3957,COG3959,PRK05261,cd00568,cd02002,cd02011,cd02012
BC1G_04043	Y	-	M	611	18	593	2	20	0	--	2	extr=25	-	-	0	pfam00732,pfam05199	KOG1238	COG2303,PLN02785,PRK02106,TIGR01810,TIGR03970
BC1G_04089	Y	-	M	250	15	235	1	5	0	--	2	extr=25	-	-	0	-	-	cd00866
BC1G_04090	Y	-	M	1096	39	1057	5	79	1	13--35	5	extr=9	-	-	1	-	-	cd07404
BC1G_04092	Y	-	M	532	21	511	1	15	0	--	3	extr=26	-	-	2	pfam00264	-	-
BC1G_04114	Y	-	M	193	17	176	2	3	0	--	-	extr=18	-	-	0	-	-	-
BC1G_04123	Y	-	M	160	20	140	8	9	0	--	-	mito=10	-	-	0	-	-	-
BC1G_04133	Y	-	M	224	20	204	0	8	1	7--29	2	extr=23	-	-	0	pfam09430	-	-
BC1G_04140	Y	-	M	57	21	36	0	4	0	--	-	mito=9	-	-	0	-	-	-
BC1G_04197	-	Y	M	452	21	431	2	10	0	--	3	extr=26	-	-	0	pfam04185	-	-
BC1G_04212	Y	-	M	33	23	10	0	1	0	--	-	cysk=18	-	-	0	-	-	-
BC1G_04227	Y	-	M	91	20	71	1	5	0	--	-	cyto=16.5	-	-	0	-	-	-
BC1G_04233	Y	-	M	409	20	389	4	14	0	--	2	extr=26	-	-	0	pfam01263	KOG1604	COG2017,PLN00194,PRK11055,PTZ00485,TIGR02636,cd01081,cd09019,cd09021
BC1G_04241	Y	-	M	964	23	941	0	65	0	--	9	nucl=18.5	-	-	1	-	-	cd05507
BC1G_04246	Y	-	M	428	16	412	15	2	0	--	4	extr=27	-	-	2	pfam00295	-	COG5434,PLN02155,PLN02188,PLN02218,PLN02793,PLN03003,PLN03010
BC1G_04267	Y	-	M	208	19	189	1	7	0	--	-	extr=24	-	-	2	-	-	-
BC1G_04280	Y	-	M	61	20	41	3	1	0	--	-	extr=21	-	-	0	-	-	-
BC1G_04284	Y	-	M	515	18	497	7	31	0	--	4	nucl=8	-	-	1	-	-	-
BC1G_04315	Y	-	M	586	23	563	7	14	1	2--24	3	extr=25	-	-	1	pfam01565,pfam08031	-	COG0277
BC1G_04325	Y	-	M	58	14	44	1	2	0	--	-	extr=13	-	-	0	-	-	-
BC1G_04327	Y	-	M	1559	19	1540	12	86	0	--	4	cyto=7.5	-	-	2	pfam00632	KOG0168,KOG0170,KOG0939,KOG0940,KOG0941,KOG0942,KOG0943,KOG4427	COG5021,cd00078,smart00119
BC1G_04347	Y	-	M	191	17	174	6	5	0	--	2	extr=20	-	-	1	-	-	-
BC1G_04349	Y	-	M	102	19	83	2	5	0	--	-	extr=8	-	-	0	-	-	-
BC1G_04353	Y	-	M	133	24	109	2	15	1	5--24	2	nucl=11	-	-	1	-	-	-
BC1G_04368	Y	-	M	238	20	218	0	4	0	--	5	extr=27	-	-	0	-	-	-
BC1G_04390	Y	-	M	670	34	636	1	21	1	7--29	3	extr=17	Y	-	2	pfam00012,pfam06723	KOG0100,KOG0101,KOG0102,KOG0103,KOG0104	CHL00094,COG0443,COG0849,COG1077,COG4820,PLN03184,PRK00290,PRK01433,PRK05183,PRK13410,PRK13411,PRK13927,PRK13928,PRK13929,PRK13930,PRK15080,PTZ00009,PTZ00186,PTZ00400,TIGR00904,TIGR01991,TIGR02350,TIGR02529
BC1G_04440	Y	-	M	176	25	151	4	8	0	--	2	mito=13	-	-	0	-	-	-
BC1G_04493	Y	-	M	233	24	209	3	16	0	--	3	mito=10	-	-	0	-	-	-
BC1G_04506	Y	-	M	105	21	84	13	1	0	--	2	extr=27	-	-	1	-	-	-
BC1G_04511	Y	-	M	93	21	72	1	5	0	--	-	nucl=9.5	-	-	1	-	-	-
BC1G_04515	Y	-	M	386	22	364	6	2	0	--	4	extr=25	-	-	0	-	-	cd01846
BC1G_04521	Y	-	M	167	24	143	8	4	0	--	3	extr=25	-	-	1	-	-	-
BC1G_04523	-	Y	M	460	18	442	3	7	0	--	3	extr=21	-	-	1	pfam04185	-	-
BC1G_04534	Y	-	M	87	54	33	0	4	1	35--57	-	mito=10	-	-	0	pfam03595	-	cd09317,cd09318
BC1G_04536	Y	-	M	65	26	39	1	2	1	15--37	-	plas=9	-	-	1	-	-	-
BC1G_04547	Y	-	M	481	22	459	6	28	1	5--27	-	plas=9	-	-	1	pfam00067	KOG0156,KOG0157,KOG0158,KOG0159,KOG0684	COG2124,PLN00110,PLN00168,PLN02169,PLN02183,PLN02290,PLN02302,PLN02394,PLN02426,PLN02655,PLN02687,PLN02738,PLN02774,PLN02936,PLN02966,PLN02971,PLN02987,PLN03112,PLN03195,PLN03234,PTZ00404
BC1G_04574	Y	-	M	137	20	117	2	4	1	7--26	-	extr=16	-	-	0	pfam00026	-	cd05471,cd05477,cd05478,cd05486,cd05488
BC1G_04592	Y	-	M	90	23	67	3	8	1	5--27	-	extr=10	-	-	0	-	-	-
BC1G_04648	Y	-	M	70	48	22	0	0	1	29--51	-	extr=10	-	-	0	-	-	-
BC1G_04660	Y	-	M	154	22	132	8	0	0	--	2	extr=26	-	-	0	-	-	-
BC1G_04668	Y	-	M	66	21	45	0	2	1	7--29	-	cyto=22	-	-	0	-	-	-
BC1G_04705	Y	-	M	276	19	257	1	11	0	--	2	extr=17	-	-	0	pfam01328	-	-
BC1G_04708	Y	-	M	364	20	344	1	7	1	2--24	3	extr=27	-	-	0	pfam00082,pfam05922	KOG1153	cd00306,cd04077,cd07473,cd07477,cd07480,cd07484,cd07487,cd07490,cd07498
BC1G_04742	Y	-	M	163	20	143	8	4	0	--	2	mito=12	-	-	2	-	-	-
BC1G_04793	Y	-	M	118	33	85	4	5	0	--	-	mito=22	-	-	1	-	-	-
BC1G_04810	Y	-	M	271	21	250	6	5	0	--	2	extr=26	-	-	1	pfam00089	KOG3627	COG5640,cd00190,smart00020
BC1G_04878	Y	-	M	127	24	103	0	6	0	--	3	mito=17	-	-	1	-	-	-
BC1G_04882	Y	-	M	1224	23	1201	37	16	1	7--26	8	extr=27	-	-	0	pfam01822	KOG4157	smart00321
BC1G_04885	Y	-	M	424	23	401	11	25	0	--	3	mito=6	-	-	1	pfam00271	KOG0298,KOG0384,KOG0385,KOG0386,KOG0387,KOG0388,KOG0389,KOG0390,KOG0391,KOG0392,KOG1000,KOG1001,KOG1002,KOG1015,KOG1016,KOG4439	COG0553,PLN03142,cd00079,smart00490
BC1G_04897	Y	-	M	106	28	78	0	8	1	5--27	2	plas=14	-	-	1	-	-	-
BC1G_04913	-	Y	M	321	26	295	1	4	0	--	2	extr=24	-	-	0	pfam01670	-	-
BC1G_04917	-	Y	M	143	22	121	1	2	0	--	2	extr=14	-	-	0	-	-	-
BC1G_04918	Y	-	M	133	22	111	0	12	1	6--28	3	extr=18	-	-	0	-	-	-
BC1G_04919	Y	-	M	389	21	368	1	14	0	--	2	extr=24	-	-	0	pfam03403	KOG3847	-
BC1G_04935	Y	-	M	282	17	265	27	7	0	--	4	extr=27	-	-	0	-	-	-
BC1G_04945	Y	-	M	1053	26	1027	17	18	1	13--35	9	extr=20	-	-	1	pfam01822	-	-
BC1G_04947	Y	-	M	313	18	295	3	10	0	--	2	extr=23	-	-	1	pfam03663	-	-
BC1G_04948	-	Y	M	444	19	425	10	6	0	--	3	extr=26	-	-	0	pfam00722	-	COG2273,PLN03161,cd00413,cd02175,cd02176,cd02183,cd06923,cd08023
BC1G_04955	Y	-	M	537	19	518	6	22	0	--	2	extr=24	-	-	0	pfam00141	-	cd00314,cd08201
BC1G_04968	Y	-	M	206	25	181	0	5	0	--	3	extr=8	-	-	0	-	-	-
BC1G_04994	Y	-	M	506	26	480	8	14	0	--	4	extr=26	-	-	0	pfam05270,pfam09206	-	-
BC1G_05010	Y	-	M	573	22	551	6	19	0	--	5	extr=26	-	-	0	pfam01412	KOG0521,KOG0703,KOG0704,KOG0705,KOG0706,KOG0818,KOG1117	COG5347,PLN03114,PLN03131,smart00105
BC1G_05033	Y	-	M	234	17	217	3	10	0	--	5	extr=26	-	-	0	pfam14021	-	-
BC1G_05056	Y	-	M	210	19	191	2	6	0	--	2	extr=27	-	-	0	-	-	smart00754
BC1G_05076	Y	-	M	372	19	353	3	5	0	--	2	extr=25	-	-	0	-	-	-
BC1G_05097	Y	-	M	423	26	397	0	11	0	--	7	extr=13	-	-	0	-	-	-
BC1G_05101	Y	-	M	256	20	236	5	4	0	--	3	extr=12	-	-	0	-	-	-
BC1G_05134	Y	-	M	147	19	128	8	1	0	--	2	extr=25	-	-	0	-	-	-
BC1G_05152	Y	-	M	34	22	12	2	2	0	--	-	mito=11	-	-	0	-	-	-
BC1G_05184	Y	-	M	518	15	503	4	31	0	--	2	mito=12.5	-	-	1	pfam00067	KOG0156,KOG0157,KOG0158,KOG0159,KOG0684	COG2124,PLN02169,PLN02196,PLN02290,PLN02426,PLN02655,PLN02687,PLN02738,PLN02936,PLN02987,PLN03112,PLN03195,PTZ00404
BC1G_05195	Y	-	M	1280	22	1258	10	17	0	--	5	extr=12	-	-	1	-	-	-
BC1G_05197	Y	-	M	544	21	523	8	38	0	--	2	plas=12	-	-	0	pfam00067	KOG0156,KOG0157,KOG0158,KOG0159,KOG0684	COG2124,PLN00110,PLN00168,PLN02183,PLN02290,PLN02302,PLN02394,PLN02426,PLN02655,PLN02687,PLN02738,PLN02936,PLN02966,PLN02971,PLN03018,PLN03112,PLN03234,PTZ00404
BC1G_05199	Y	-	M	206	18	188	4	1	0	--	2	extr=20	-	-	0	pfam01083	-	-
BC1G_05269	Y	-	M	81	20	61	0	1	0	--	-	cysk=11	-	-	0	-	-	-
BC1G_05282	Y	-	M	319	28	291	4	17	1	12--34	2	golg=9	-	-	0	-	-	-
BC1G_05283	Y	-	M	64	25	39	0	2	1	7--26	-	plas=11	-	-	0	-	-	-
BC1G_05330	Y	-	M	337	19	318	3	15	0	--	2	cyto=14	-	-	1	pfam01266,pfam01494	KOG2614	COG0644,COG0654,COG1233,PRK04176,PRK06183,PRK06184,PRK06475,PRK06753,PRK06834,PRK06847,PRK07190,PRK07364,PRK07538,PRK07608,PRK08013,PRK08163,PRK08243,PRK08244,PRK08849,TIGR01984,TIGR01988,TIGR02032
BC1G_05337	Y	-	M	800	40	760	7	21	1	13--35	4	extr=26	-	-	0	-	-	-
BC1G_05377	Y	-	M	241	23	218	1	8	0	--	-	extr=10	-	-	0	pfam08031	-	COG0277
BC1G_05387	Y	-	M	631	36	595	4	39	1	13--30	2	extr=9	-	-	1	-	-	smart00672
BC1G_05427	Y	-	M	407	30	377	5	16	0	--	2	cyto=10	-	-	0	pfam02492	KOG2743	COG0523,PRK11537,TIGR02475,cd03112
BC1G_05439	Y	-	M	71	18	53	2	4	0	--	2	nucl=11.5	-	-	0	-	-	-
BC1G_05442	Y	-	M	323	17	306	4	4	0	--	2	extr=27	-	-	0	-	-	-
BC1G_05455	Y	-	M	365	22	343	7	2	0	--	4	extr=26	-	-	1	pfam00704	KOG4701	cd02877
BC1G_05458	Y	-	M	279	34	245	5	14	1	7--29	-	plas=14	-	-	0	pfam00300	KOG4754	COG0406
BC1G_05460	Y	-	M	68	23	45	0	4	0	--	-	mito=12	-	-	0	-	-	-
BC1G_05465	Y	-	M	61	19	42	0	11	0	--	-	mito=22	-	30--44	0	-	-	-
BC1G_05478	Y	-	M	196	16	180	2	6	0	--	-	extr=18	-	-	0	-	-	-
BC1G_05479	Y	-	M	133	21	112	2	14	0	--	2	extr=20	-	52--66	0	-	-	-
BC1G_05488	Y	-	M	411	19	392	1	15	0	--	2	extr=24	-	-	0	pfam05426	-	-
BC1G_05514	Y	-	M	54	18	36	2	3	1	4--21	-	cyto=10	-	-	0	-	-	-
BC1G_05517	Y	-	M	569	20	549	9	12	0	--	4	extr=27	-	-	1	pfam01565,pfam08031	-	COG0277
BC1G_05539	Y	-	M	742	22	720	23	13	0	--	6	extr=26	-	-	0	pfam03659	-	cd11573,cd11577
BC1G_05542	Y	-	M	295	18	277	6	9	0	--	3	extr=27	-	-	1	-	-	-
BC1G_05544	Y	-	M	531	29	502	7	27	1	13--35	2	mito=10	-	-	0	pfam00067	KOG0156,KOG0157,KOG0158,KOG0159,KOG0684	COG2124,PLN00110,PLN00168,PLN02169,PLN02183,PLN02196,PLN02290,PLN02302,PLN02394,PLN02426,PLN02500,PLN02655,PLN02687,PLN02738,PLN02774,PLN02936,PLN02966,PLN02971,PLN02987,PLN03018,PLN03112,PLN03141,PLN03195,PLN03234,PTZ00404
BC1G_05569	Y	-	M	533	26	507	8	31	1	5--27	2	extr=7	-	-	1	pfam13506,pfam13641	KOG2547	COG1215,TIGR03472,cd02520
BC1G_05576	Y	-	M	269	21	248	7	6	0	--	2	extr=26	-	-	1	pfam11790	-	-
BC1G_05582	Y	-	M	210	18	192	4	4	0	--	2	extr=15	-	-	0	-	-	-
BC1G_05590	Y	-	M	89	18	71	0	2	0	--	2	extr=18	-	-	0	-	-	-
BC1G_05596	Y	-	M	224	20	204	0	9	1	7--29	3	extr=16	-	-	0	-	-	-
BC1G_05599	Y	-	M	107	29	78	0	5	0	--	-	extr=7	-	-	1	-	-	-
BC1G_05603	Y	-	M	269	18	251	6	16	0	--	2	mito=10	-	-	1	-	-	-
BC1G_05625	Y	-	M	391	30	361	2	16	0	--	2	mito=10	-	-	0	pfam13802	KOG1066	COG1501
BC1G_05640	Y	-	M	124	24	100	1	1	1	5--27	2	extr=18	-	-	0	-	-	-
BC1G_05641	Y	-	M	467	19	448	10	24	1	7--29	3	extr=22	-	-	3	-	-	-
BC1G_05646	Y	-	M	185	22	163	4	8	0	--	2	extr=25	-	-	0	-	-	-
BC1G_05655	Y	-	M	782	20	762	17	42	0	--	3	golg=8	-	476--491	0	-	-	-
BC1G_05658	Y	-	M	131	17	114	0	3	0	--	3	extr=25	-	-	0	-	-	-
BC1G_05659	-	Y	M	89	15	74	0	1	0	--	2	extr=25	-	-	0	-	-	-
BC1G_05680	Y	-	M	65	20	45	0	1	0	--	2	cyto=20	-	-	0	-	-	-
BC1G_05692	Y	-	M	53	23	30	1	4	0	--	-	mito=9	-	-	0	-	-	-
BC1G_05693	Y	-	M	404	20	384	4	15	1	7--24	2	extr=12	-	-	0	pfam06824	-	COG3538
BC1G_05698	Y	-	M	84	17	67	2	3	0	--	-	mito=13	-	-	0	-	-	-
BC1G_05702	Y	-	M	83	26	57	0	5	1	4--26	2	plas=13	-	-	1	-	-	-
BC1G_05726	Y	-	M	155	20	135	10	1	1	7--29	2	extr=27	-	-	0	-	-	-
BC1G_05731	Y	-	M	49	34	15	0	1	1	13--35	-	plas=12	-	-	1	-	-	-
BC1G_05733	Y	-	M	383	17	366	8	22	0	--	5	E.R.=7	-	-	0	-	-	-
BC1G_05736	Y	-	M	374	37	337	1	21	1	13--35	2	mito=18	-	-	2	pfam03452	-	-
BC1G_05748	-	Y	M	254	20	234	4	5	0	--	2	extr=26	-	-	0	pfam00080	-	-
BC1G_05750	-	Y	M	228	20	208	3	14	0	--	4	extr=11	-	-	1	-	-	-
BC1G_05760	Y	-	M	46	19	27	0	2	0	--	-	mito=9	-	-	0	-	-	-
BC1G_05765	Y	-	M	779	21	758	10	24	0	--	3	extr=22	-	-	1	pfam09286	-	COG4934,cd04056,cd11377,smart00944
BC1G_05775	Y	-	M	138	23	115	0	8	1	7--29	-	mito=10	-	-	0	-	-	-
BC1G_05776	Y	-	M	51	33	18	0	0	1	5--27	-	extr=13	-	-	0	-	-	-
BC1G_05779	Y	-	M	149	32	117	2	15	1	7--29	2	extr=7	-	-	1	-	-	-
BC1G_05789	Y	-	M	229	19	210	4	14	0	--	-	cyto=10	-	-	0	-	-	-
BC1G_05799	Y	-	M	200	17	183	2	5	0	--	2	cyto=20.5	-	-	1	pfam00254	KOG0543,KOG0544,KOG0549,KOG0552	COG0545,COG1047,PRK10902,PRK11570
BC1G_05814	Y	-	M	239	26	213	2	7	1	7--29	2	extr=25	-	-	1	-	-	-
BC1G_05820	Y	-	M	66	33	33	1	4	1	20--42	-	cyto=7	-	-	0	-	-	-
BC1G_05856	Y	-	M	191	18	173	5	4	0	--	2	cyto=20.5	-	-	0	pfam01965,pfam13278	-	COG4977,cd03135,cd03136,cd03137,cd03138,cd03139,cd03140
BC1G_05859	Y	-	M	48	23	25	0	1	0	--	-	mito=13	-	-	0	-	-	-
BC1G_05866	Y	-	M	109	22	87	6	4	0	--	-	extr=24	-	-	0	-	-	-
BC1G_05877	Y	-	M	48	20	28	0	2	1	7--25	-	extr=14	-	-	0	-	-	-
BC1G_05885	Y	-	M	374	17	357	7	6	0	--	5	extr=26	-	-	0	-	-	-
BC1G_05902	Y	-	M	71	20	51	0	4	1	4--26	-	mito=18	-	-	0	-	-	-
BC1G_05904	Y	-	M	330	22	308	4	13	0	--	2	mito=12	-	-	1	pfam00106	KOG0725,KOG1201,KOG1205,KOG1208,KOG1611	COG0300,COG1028,COG3967,COG4221,PLN00015,PRK05854,PRK06125,PRK06196,PRK06197,PRK06914,PRK07453,PRK08945,PRK09072,PRK12826,TIGR01289,cd05233,cd05323,cd05324,cd05325,cd05327,cd05330,cd05332,cd05340,cd05350,cd05354,cd05364,cd05369,cd05370,cd05374,cd08932,cd08939,cd08941,cd08951,cd09807,cd09808,cd09809,cd09810
BC1G_05925	Y	-	M	323	22	301	6	4	0	--	2	extr=24	-	-	0	-	KOG4701	cd02877
BC1G_05939	Y	-	M	79	21	58	3	5	0	--	-	nucl=9	-	-	2	-	-	-
BC1G_05955	Y	-	M	60	24	36	1	2	0	--	2	cyto=18	-	-	0	-	-	-
BC1G_05956	Y	-	M	287	29	258	8	12	1	12--34	2	extr=8	-	-	0	-	-	-
BC1G_05957	Y	-	M	89	33	56	3	4	0	--	-	mito=20	-	-	2	-	-	-
BC1G_05961	Y	-	M	278	20	258	6	5	0	--	2	extr=23	-	-	0	pfam00295	-	PLN02155,PLN02188,PLN02218,PLN03003,PLN03010
BC1G_05963	Y	-	M	68	27	41	0	1	1	12--34	-	cyto=14	-	-	1	-	-	-
BC1G_05964	Y	-	M	59	25	34	0	7	1	4--26	-	mito=11	-	-	1	-	-	-
BC1G_05976	Y	-	M	159	17	142	2	2	0	--	3	extr=24	-	-	0	-	-	-
BC1G_05983	Y	-	M	649	22	627	8	36	0	--	2	nucl=15.5	-	-	1	-	-	cd00180
BC1G_05986	Y	-	M	437	18	419	2	7	0	--	2	extr=23	-	-	0	pfam01565	-	COG0277
BC1G_06004	-	Y	M	325	20	305	3	10	0	--	2	extr=24	-	-	1	pfam03198	-	-
BC1G_06005	Y	-	M	58	18	40	1	2	0	--	-	extr=21	-	-	0	-	-	-
BC1G_06019	Y	-	M	139	18	121	7	2	0	--	2	extr=22	-	-	1	-	-	-
BC1G_06029	Y	-	M	1125	22	1103	22	59	0	--	4	nucl=12.5	-	-	5	pfam12796	KOG0195,KOG0502,KOG0505,KOG0507,KOG0508,KOG0509,KOG0510,KOG4177,KOG4412	COG0666,PHA02874,PHA02875,PHA02878,PHA03095,PHA03100,TIGR00870,cd00204
BC1G_06031	Y	-	M	183	19	164	3	12	0	--	-	extr=16	-	-	0	-	-	-
BC1G_06034	Y	-	M	285	19	266	4	9	1	7--29	-	extr=13	-	-	0	pfam00106,pfam08659,pfam13561	KOG0725,KOG1014,KOG1199,KOG1200,KOG1201,KOG1204,KOG1205,KOG1207,KOG1208,KOG1209,KOG1210,KOG1610,KOG1611,KOG4169	COG0300,COG0623,COG1028,COG3967,COG4221,PLN02253,PRK05557,PRK05565,PRK05650,PRK05653,PRK05693,PRK05786,PRK05855,PRK05866,PRK05867,PRK05872,PRK05875,PRK06057,PRK06077,PRK06113,PRK06114,PRK06123,PRK06124,PRK06128,PRK06138,PRK06171,PRK06172,PRK06179,PRK06180,PRK06181,PRK06182,PRK06194,PRK06196,PRK06198,PRK06200,PRK06398,PRK06463,PRK06484,PRK06500,PRK06523,PRK06550,PRK06701,PRK06841,PRK06914,PRK06935…
BC1G_06035	Y	-	M	516	17	499	22	9	0	--	3	extr=26	-	-	0	pfam00734,pfam00840	-	cd07999,smart00236
BC1G_06037	Y	-	M	229	16	213	2	9	0	--	-	extr=12	-	-	1	-	-	-
BC1G_06046	-	Y	M	240	17	223	3	1	0	--	3	extr=25	-	-	1	-	-	-
BC1G_06101	Y	-	M	54	21	33	0	3	0	--	-	mito=10	-	-	0	-	-	-
BC1G_06114	Y	-	M	351	17	334	8	8	0	--	2	extr=24	-	-	0	pfam11327	-	-
BC1G_06137	Y	-	M	531	33	498	3	30	1	5--27	-	plas=20	-	-	3	-	-	-
BC1G_06143	Y	-	M	75	21	54	1	5	0	--	-	cyto=12	-	-	0	-	-	-
BC1G_06149	Y	-	M	413	36	377	4	20	1	20--42	2	extr=6	-	-	5	pfam00067	KOG0156,KOG0157,KOG0158,KOG0159	COG2124,PLN02655,PLN02687,PTZ00404
BC1G_06150	Y	-	M	542	24	518	7	38	1	5--27	2	mito=6	-	-	1	pfam00067	KOG0156,KOG0157,KOG0158,KOG0159,KOG0684	COG2124,PLN00110,PLN02169,PLN02196,PLN02290,PLN02302,PLN02394,PLN02500,PLN02655,PLN02687,PLN02774,PLN02936,PLN02966,PLN02987,PLN03112,PLN03141,PLN03195,PTZ00404
BC1G_06162	Y	-	M	67	27	40	0	0	1	21--43	-	extr=23	-	-	0	-	-	-
BC1G_06176	Y	-	M	477	26	451	7	26	1	2--24	2	E.R.=8	-	-	1	pfam00067	KOG0156,KOG0157,KOG0158,KOG0159,KOG0684	COG2124,PLN00110,PLN00168,PLN02169,PLN02183,PLN02196,PLN02290,PLN02302,PLN02394,PLN02655,PLN02687,PLN02738,PLN02774,PLN02936,PLN02966,PLN02971,PLN02987,PLN03018,PLN03112,PLN03141,PLN03234,PTZ00404
BC1G_06178	Y	-	M	508	34	474	5	36	1	12--29	2	cyto=9.5	-	-	0	pfam00067	KOG0156,KOG0157,KOG0158,KOG0159,KOG0684	COG2124,PLN00110,PLN02169,PLN02183,PLN02196,PLN02290,PLN02394,PLN02426,PLN02655,PLN02687,PLN02738,PLN02936,PLN02966,PLN03112,PLN03195,PLN03234
BC1G_06181	Y	-	M	107	28	79	2	7	0	--	2	cyto_mito=8.166	-	-	0	-	-	-
BC1G_06184	Y	-	M	521	31	490	11	15	1	7--26	3	extr=9	-	-	1	pfam01150	KOG1385,KOG1386	COG5371
BC1G_06185	Y	-	M	236	20	216	3	8	0	--	-	cyto=8	-	-	0	pfam01161	KOG3346	PLN00169,cd00866
BC1G_06204	Y	-	M	54	16	38	0	2	0	--	-	extr=13	-	-	0	-	-	-
BC1G_06211	Y	-	M	136	17	119	4	2	0	--	2	extr=25	-	-	0	-	-	-
BC1G_06219	Y	-	M	156	17	139	0	15	0	--	2	mito=9	-	-	0	-	-	-
BC1G_06235	Y	-	M	850	17	833	11	54	0	--	3	E.R.=8	-	-	2	pfam04082	-	smart00906
BC1G_06237	Y	-	M	400	17	383	4	15	0	--	2	extr=24	-	-	2	pfam01425	KOG1211	COG0154,PRK00012,PRK06707,PRK06828,PRK08137,TIGR00132
BC1G_06243	Y	-	M	482	21	461	16	2	0	--	6	extr=15	-	-	1	-	-	-
BC1G_06263	Y	-	M	215	35	180	4	10	1	7--29	-	extr=20	-	-	1	-	-	cd00421,cd03457
BC1G_06270	Y	-	M	115	22	93	4	11	0	--	-	mito=9	-	-	0	-	-	-
BC1G_06274	Y	-	M	193	19	174	3	7	0	--	2	extr=27	-	-	1	pfam01083	-	-
BC1G_06275	Y	-	M	149	15	134	4	6	0	--	2	extr=17	-	-	0	pfam07519	-	-
BC1G_06277	Y	-	M	197	24	173	6	14	1	13--32	2	plas=6	-	-	0	-	-	-
BC1G_06285	Y	-	M	77	19	58	2	1	0	--	-	mito=8.5	-	-	0	-	KOG1088	-
BC1G_06299	Y	-	M	294	21	273	8	18	0	--	2	cysk=11	-	-	0	-	-	-
BC1G_06310	Y	-	M	246	20	226	3	10	0	--	3	extr=24	-	-	1	pfam05630	-	-
BC1G_06314	Y	-	M	180	20	160	2	5	0	--	-	extr=24	-	-	0	-	-	-
BC1G_06328	Y	-	M	645	20	625	3	22	0	--	3	extr=27	-	-	0	pfam05592	-	-
BC1G_06334	Y	-	M	516	17	499	6	11	0	--	2	extr=26	-	-	1	pfam01565	KOG1231	COG0277,PLN02441,TIGR01678
BC1G_06337	Y	-	M	61	25	36	1	1	1	10--32	-	extr=8	-	-	0	-	-	-
BC1G_06365	Y	-	M	66	36	30	0	5	1	13--35	-	plas=15	-	-	0	-	-	-
BC1G_06367	-	Y	M	445	18	427	2	13	0	--	4	extr=25	-	-	0	pfam09949	-	COG4850
BC1G_06369	Y	-	M	256	17	239	4	3	0	--	2	extr=27	-	-	0	pfam01083	-	-
BC1G_06376	Y	-	M	166	24	142	4	3	1	7--29	-	extr=20	-	-	0	-	-	-
BC1G_06380	Y	-	M	94	15	79	0	4	0	--	-	extr=22	-	-	1	pfam00795	-	cd07197,cd07564
BC1G_06436	Y	-	M	158	45	113	2	10	1	34--56	-	nucl=10	-	-	2	-	-	-
BC1G_06439	Y	-	M	464	27	437	5	16	1	12--34	2	plas=11	-	-	0	pfam11051	-	-
BC1G_06459	Y	-	M	501	21	480	5	34	0	--	3	mito=8	-	-	1	pfam00067	KOG0156,KOG0157,KOG0158,KOG0159,KOG0684	COG2124,PLN00110,PLN00168,PLN02169,PLN02183,PLN02196,PLN02290,PLN02302,PLN02394,PLN02426,PLN02500,PLN02655,PLN02687,PLN02738,PLN02774,PLN02936,PLN02966,PLN02971,PLN02987,PLN03112,PLN03195,PLN03234,PTZ00404
BC1G_06463	Y	-	M	549	18	531	8	11	0	--	3	extr=25	-	-	0	pfam00128,pfam09260	KOG0471,KOG2212	COG0366,COG3280,PRK09505,PRK10785,PRK10933,TIGR02403,cd00551,cd11313,cd11314,cd11315,cd11316,cd11319,cd11320,cd11328,cd11330,cd11331,cd11332,cd11333,cd11334,cd11338,cd11339,cd11340,cd11348,cd11350,cd11352,cd11359,smart00642
BC1G_06469	Y	-	M	90	23	67	1	3	0	--	-	mito_nucl=12.833	-	-	0	-	-	-
BC1G_06509	Y	-	M	484	18	466	28	9	0	--	3	extr=25	-	-	0	pfam01522	-	COG0726,TIGR02764,TIGR02884,TIGR03006,cd10585,cd10916,cd10917,cd10918,cd10938,cd10941,cd10943,cd10944,cd10946,cd10947,cd10948,cd10949,cd10950,cd10951,cd10952,cd10953,cd10954,cd10955,cd10956,cd10958,cd10959,cd10960,cd10962,cd10967,cd10970,cd11618
BC1G_06540	-	Y	M	482	20	462	4	12	0	--	2	extr=25	-	-	0	pfam00026	KOG1339	PLN03146,PTZ00013,PTZ00147,PTZ00165,cd05470,cd05471,cd05472,cd05473,cd05474,cd05475,cd05476,cd05477,cd05478,cd05485,cd05486,cd05487,cd05488,cd05490,cd06096,cd06097,cd06098
BC1G_06546	Y	-	M	460	20	440	9	14	0	--	2	extr=25	-	-	1	pfam02065	KOG2366	COG3345,PLN02229,PLN02692,PLN02808,PLN02899,PLN03231
BC1G_06592	Y	-	M	674	38	636	14	19	1	13--35	3	extr=23	-	-	2	pfam12929	-	-
BC1G_06633	Y	-	M	52	16	36	0	0	0	--	-	nucl=14.5	-	-	0	-	-	-
BC1G_06698	Y	-	M	335	33	302	2	11	1	15--34	2	plas=10	-	229--244	1	-	-	-
BC1G_06727	Y	-	M	173	20	153	0	5	0	--	-	extr=18	-	-	0	pfam12296	-	-
BC1G_06748	Y	-	M	468	29	439	3	32	0	--	3	mito=8	-	-	2	pfam00067	KOG0156,KOG0157,KOG0158,KOG0159,KOG0684	COG2124,PLN00110,PLN02302,PLN02394,PLN02687,PLN02774,PTZ00404
BC1G_06758	Y	-	M	218	29	189	0	11	0	--	-	cysk=13	-	-	0	pfam00494	KOG4411	-
BC1G_06769	Y	-	M	542	17	525	12	6	0	--	3	extr=25	-	-	0	-	-	-
BC1G_06780	-	Y	M	211	17	194	0	0	0	--	2	extr=27	-	-	0	pfam10342	-	-
BC1G_06786	Y	-	M	42	18	24	0	0	0	--	-	extr=10	-	-	0	-	-	-
BC1G_06815	Y	-	M	933	21	912	27	5	0	--	10	extr=25	-	-	0	-	-	-
BC1G_06824	Y	-	M	60	31	29	0	5	1	15--37	-	cyto=19	-	-	0	-	-	-
BC1G_06830	Y	-	M	329	19	310	4	20	0	--	3	cyto=11	-	-	0	pfam10058	KOG2846	COG5415
BC1G_06836	Y	-	M	521	16	505	3	10	0	--	2	extr=24	-	-	0	pfam00082,pfam05922	KOG1153	COG1404,PTZ00262,TIGR03895,TIGR03921,cd00306,cd04059,cd04077,cd04842,cd04843,cd04848,cd04852,cd05561,cd05562,cd07473,cd07474,cd07475,cd07476,cd07477,cd07478,cd07480,cd07481,cd07482,cd07483,cd07484,cd07485,cd07487,cd07489,cd07490,cd07492,cd07493,cd07496,cd07498
BC1G_06840	Y	-	M	242	25	217	1	7	0	--	2	extr=27	-	-	1	pfam01095	-	PLN02170,PLN02176,PLN02197,PLN02201,PLN02217,PLN02301,PLN02304,PLN02313,PLN02314,PLN02416,PLN02432,PLN02468,PLN02480,PLN02484,PLN02488,PLN02497,PLN02506,PLN02634,PLN02665,PLN02671,PLN02682,PLN02698,PLN02708,PLN02713,PLN02745,PLN02773,PLN02916,PLN02933,PLN02990,PLN02995,PLN03043
BC1G_06847	Y	-	M	438	34	404	4	27	1	16--38	4	golg=8	-	-	0	pfam05686	KOG2458	smart00672
BC1G_06849	Y	-	M	398	17	381	4	8	0	--	3	extr=16	-	-	0	pfam00026	KOG1339	PLN03146,PTZ00013,PTZ00147,PTZ00165,cd05470,cd05471,cd05472,cd05473,cd05474,cd05475,cd05476,cd05477,cd05478,cd05485,cd05486,cd05487,cd05488,cd05490,cd06096,cd06097,cd06098
BC1G_06893	Y	-	M	512	19	493	6	28	0	--	2	extr=19	-	-	3	pfam00067	KOG0156,KOG0157,KOG0158,KOG0159,KOG0684	COG2124,PLN00110,PLN02169,PLN02183,PLN02290,PLN02302,PLN02426,PLN02655,PLN02738,PLN02936,PLN02966,PLN02987,PLN03018,PLN03112,PLN03195,PLN03234,PTZ00404
BC1G_06960	Y	-	M	400	23	377	1	16	0	--	6	plas=14	-	-	0	pfam08450	-	COG3386
BC1G_06992	Y	-	M	1107	23	1084	6	52	0	--	13	cyto=6	-	-	2	pfam13374,pfam13424	KOG1839,KOG1840,KOG4626	TIGR02917
BC1G_06997	Y	-	M	69	18	51	0	5	0	--	-	nucl=13	-	-	0	-	-	-
BC1G_07023	Y	-	M	148	22	126	5	5	1	7--28	2	nucl=8	-	-	0	pfam03184	-	-
BC1G_07052	Y	-	M	236	19	217	12	3	0	--	2	extr=23	-	-	0	pfam03211	-	-
BC1G_07053	-	Y	M	189	19	170	8	2	0	--	2	extr=26	-	-	0	-	-	-
BC1G_07054	Y	-	M	60	25	35	0	4	0	--	-	nucl=11	-	-	0	-	-	-
BC1G_07058	Y	-	M	491	18	473	8	6	0	--	3	extr=25	-	-	1	pfam03659	-	cd11573,cd11575,cd11577
BC1G_07066	Y	-	M	77	30	47	2	0	0	--	-	cyto_nucl=9.333	-	-	0	-	-	-
BC1G_07073	Y	-	M	221	17	204	4	2	0	--	3	extr=26	-	-	0	pfam11937	-	-
BC1G_07100	Y	-	M	302	18	284	0	14	0	--	2	extr=14	-	-	0	-	KOG2614	COG0654,PLN02927,PRK06185,PRK06475,PRK06753,PRK06847,PRK07364,PRK07538,PRK08163,TIGR03219
BC1G_07101	Y	-	M	857	22	835	5	23	0	--	5	extr=27	-	-	1	pfam05592	-	-
BC1G_07110	Y	-	M	804	20	784	7	26	0	--	2	extr=24	-	-	0	pfam00933,pfam01915,pfam14310	-	COG1472,PLN03080,PRK15098
BC1G_07111	Y	-	M	65	44	21	0	2	1	24--46	-	plas=12	-	-	0	-	-	-
BC1G_07149	Y	-	M	563	19	544	6	15	0	--	3	extr=25	-	-	0	pfam00450	KOG1282,KOG1283	COG2939,PLN02209,PLN03016,PTZ00472
BC1G_07160	Y	-	M	290	17	273	6	7	0	--	3	extr=25	-	-	1	-	-	cd08557,cd08586,cd08587,cd08588,cd08590
BC1G_07165	Y	-	M	143	34	109	2	7	1	4--26	-	plas=10	-	-	0	-	-	-
BC1G_07173	Y	-	M	251	19	232	4	4	0	--	2	extr=26	-	-	0	-	-	-
BC1G_07175	Y	-	M	103	20	83	6	1	0	--	-	extr=27	-	-	1	-	-	-
BC1G_07208	Y	-	M	269	22	247	5	6	0	--	-	mito=9	-	-	0	-	KOG3043	COG0412
BC1G_07215	Y	-	M	599	17	582	7	16	0	--	2	extr=25	-	-	0	pfam00728	KOG2499	COG3525,cd02742,cd06562,cd06563,cd06564,cd06565,cd06568,cd06569,cd06570
BC1G_07216	Y	-	M	422	26	396	1	25	1	5--27	2	extr=7	-	-	1	pfam00067	KOG0156,KOG0157,KOG0158,KOG0159,KOG0684	COG2124,PLN00110,PLN02169,PLN02290,PLN02302,PLN02426,PLN02500,PLN02655,PLN02687,PLN02738,PLN02936,PLN03112,PLN03195,PTZ00404
BC1G_07218	Y	-	M	642	25	617	6	23	1	7--29	2	extr=15	-	-	1	pfam00135	KOG1516,KOG4389	COG2272,cd00312
BC1G_07220	Y	-	M	565	24	541	8	5	0	--	5	extr=25	-	-	0	pfam10528	-	-
BC1G_07227	Y	-	M	156	34	122	1	11	1	10--32	-	plas=11	-	-	0	-	-	-
BC1G_07266	Y	-	M	95	35	60	2	5	1	12--34	2	plas=9	-	-	0	-	-	-
BC1G_07275	Y	-	M	756	21	735	7	24	0	--	3	extr=23	-	-	0	-	-	-
BC1G_07314	Y	-	M	283	17	266	2	0	0	--	3	extr=19	-	-	1	-	-	-
BC1G_07319	Y	-	M	781	21	760	9	13	0	--	3	extr=26	-	-	0	pfam12708	-	-
BC1G_07326	Y	-	M	346	20	326	0	20	0	--	12	extr=21	-	-	0	-	-	-
BC1G_07336	Y	-	M	104	21	83	3	7	0	--	-	mito=12	-	-	0	-	-	-
BC1G_07341	-	Y	M	321	17	304	9	4	0	--	5	extr=20	-	-	0	-	-	-
BC1G_07411	Y	-	M	35	20	15	0	1	0	--	-	extr=12	-	-	0	-	-	-
BC1G_07447	Y	-	M	509	18	491	7	34	0	--	2	extr=9	-	-	1	pfam00067	KOG0156,KOG0157,KOG0158,KOG0159,KOG0684	COG2124,PLN00168,PLN02169,PLN02183,PLN02290,PLN02394,PLN02655,PLN02687,PLN02966,PLN02971,PLN03112,PLN03195,PLN03234,PTZ00404
BC1G_07448	Y	-	M	221	17	204	4	2	0	--	2	extr=17	-	-	0	-	-	-
BC1G_07449	Y	-	M	69	18	51	0	3	0	--	-	mito=15	-	-	1	-	-	-
BC1G_07471	-	Y	M	316	20	296	3	9	0	--	2	extr=26	-	-	0	pfam11790	-	-
BC1G_07477	Y	-	M	58	18	40	1	1	0	--	-	extr=19	-	-	0	-	-	-
BC1G_07482	Y	-	M	483	15	468	3	14	0	--	3	extr=23	-	-	0	pfam01565	KOG1231	COG0277
BC1G_07483	Y	-	M	453	20	433	4	9	0	--	4	extr=27	-	-	0	pfam03583	-	-
BC1G_07488	Y	-	M	106	34	72	1	2	0	--	-	mito=11	-	-	0	-	-	-
BC1G_07508	Y	-	M	162	16	146	1	2	0	--	2	extr=11	-	-	0	-	-	-
BC1G_07521	Y	-	M	403	17	386	2	6	0	--	3	extr=26	-	-	0	pfam00026	KOG1339	PTZ00013,PTZ00147,PTZ00165,cd05470,cd05471,cd05473,cd05474,cd05477,cd05478,cd05485,cd05486,cd05487,cd05488,cd05490,cd06097,cd06098
BC1G_07527	Y	-	M	388	21	367	6	6	0	--	4	extr=27	-	-	0	pfam00544	-	COG3866,smart00656
BC1G_07541	Y	-	M	376	23	353	2	29	0	--	2	extr=8	-	-	0	pfam00067	KOG0156,KOG0157,KOG0158,KOG0159,KOG0684	COG2124,PLN02394,PLN02987
BC1G_07550	Y	-	M	87	24	63	0	6	0	--	-	mito=10	-	-	0	-	-	-
BC1G_07558	Y	-	M	377	24	353	1	13	0	--	2	extr=18	-	-	1	pfam04488	-	COG3774
BC1G_07573	-	Y	M	228	19	209	4	1	1	205--227	2	extr=27	-	-	0	-	-	-
BC1G_07577	Y	-	M	85	24	61	1	0	0	--	-	extr=23	-	-	0	-	-	-
BC1G_07608	Y	-	M	309	20	289	2	3	0	--	2	extr=25	-	-	0	pfam13668	-	-
BC1G_07611	Y	-	M	90	17	73	8	3	0	--	-	extr=20	-	-	0	-	-	-
BC1G_07620	Y	-	M	579	23	556	3	21	0	--	3	extr=20	-	-	0	pfam01019	KOG2410	COG0405,PLN02180,PLN02198,PRK09615,TIGR00066
BC1G_07622	Y	-	M	786	27	759	7	24	0	--	3	extr=26	-	-	1	pfam00933,pfam01915,pfam14310	-	COG1472,PLN03080,PRK15098
BC1G_07629	Y	-	M	106	19	87	3	4	0	--	-	extr=14	-	-	0	-	-	-
BC1G_07637	Y	-	M	556	17	539	6	13	0	--	4	extr=27	-	-	1	pfam00135	KOG1515,KOG1516,KOG4389	COG0657,COG2272,cd00312
BC1G_07648	Y	-	M	53	23	30	0	3	1	7--29	-	mito=11	-	-	0	-	-	-
BC1G_07651	Y	-	M	312	20	292	4	14	0	--	-	extr=12	-	-	0	-	-	-
BC1G_07653	Y	-	M	325	18	307	5	1	0	--	3	extr=24	-	-	0	pfam03443	-	-
BC1G_07654	Y	-	M	86	21	65	0	3	0	--	-	cyto=17.5	-	-	0	-	-	-
BC1G_07658	Y	-	M	376	20	356	4	2	0	--	4	extr=25	-	-	0	pfam03443	-	-
BC1G_07661	Y	-	M	558	26	532	5	24	1	5--27	2	extr=7	-	-	0	pfam00067	KOG0156,KOG0157,KOG0158,KOG0159,KOG0684	COG2124,PLN02169,PLN02196,PLN02290,PLN02426,PLN02655,PLN02687,PLN02936,PLN03195,PTZ00404
BC1G_07711	Y	-	M	161	18	143	2	7	0	--	-	cyto=12	-	-	0	pfam00106,pfam08659	-	cd05274,cd08954,cd08955,cd08956,smart00822
BC1G_07724	Y	-	M	525	22	503	6	32	0	--	-	plas=8	-	-	1	pfam00067	KOG0156,KOG0157,KOG0158,KOG0159,KOG0684	COG2124,PLN02966
BC1G_07732	Y	-	M	121	20	101	1	10	0	--	-	nucl=11	-	-	0	-	-	-
BC1G_07744	Y	-	M	572	18	554	1	15	1	7--26	2	extr=16	-	-	1	pfam01593,pfam07156	-	-
BC1G_07754	Y	-	M	54	22	32	0	1	1	5--27	-	mito=12	-	-	1	-	-	-
BC1G_07767	Y	-	M	114	33	81	0	9	1	15--34	-	plas=7	-	-	0	-	-	-
BC1G_07770	Y	-	M	508	16	492	6	9	0	--	2	extr=22	-	-	1	pfam02225,pfam04389	KOG2195	COG2234,cd00538,cd02130,cd02133,cd02690,cd03876,cd03877,cd03879,cd04816,cd04818,cd08015
BC1G_07778	Y	-	M	480	23	457	7	3	0	--	7	extr=25	-	-	0	-	-	-
BC1G_07781	Y	-	M	93	32	61	2	4	1	15--37	-	mito=24	-	-	1	-	-	-
BC1G_07794	Y	-	M	845	23	822	9	22	0	--	3	extr=26	-	-	1	pfam00732,pfam05199	KOG1238	COG2303,PLN02785,PRK02106,TIGR01810,TIGR03970,cd09630
BC1G_07813	Y	-	M	129	17	112	1	3	0	--	2	mito=9	-	-	1	-	-	-
BC1G_07816	-	Y	M	166	20	146	0	1	1	141--163	-	extr=20	-	-	0	-	-	-
BC1G_07820	Y	-	M	561	33	528	9	10	0	--	2	extr=24	-	-	0	pfam00128,pfam09260	KOG0470,KOG0471,KOG2212	COG0296,COG0366,COG3280,PRK09505,PRK10785,PRK10933,PRK14511,TIGR02401,TIGR02402,TIGR02403,TIGR02456,cd00551,cd11313,cd11314,cd11315,cd11316,cd11317,cd11319,cd11320,cd11323,cd11324,cd11325,cd11328,cd11330,cd11331,cd11332,cd11333,cd11334,cd11336,cd11337,cd11338,cd11339,cd11340,cd11347,cd11348,cd11350,cd11352,cd11353,cd11354,cd11359,smart00642
BC1G_07822	Y	-	M	599	19	580	2	8	0	--	3	extr=25	-	-	0	pfam00150,pfam03442	-	COG2730
BC1G_07829	Y	-	M	88	27	61	0	5	1	5--27	-	plas=16	-	-	0	-	-	-
BC1G_07831	Y	-	M	80	25	55	1	4	1	10--30	-	mito=11	-	-	0	-	-	-
BC1G_07836	Y	-	M	85	22	63	3	4	0	--	-	extr=11	-	-	0	-	-	-
BC1G_07849	Y	-	M	98	19	79	1	10	1	7--25	-	cyto_nucl=7	-	-	0	-	-	-
BC1G_07851	-	Y	M	553	25	528	5	11	1	487--509	3	extr=25	-	-	0	pfam00026	KOG1339	cd05471,cd05474
BC1G_07854	Y	-	M	298	17	281	0	7	0	--	3	extr=25	-	-	1	-	-	cd02871,cd06546
BC1G_07859	Y	-	M	738	23	715	2	32	1	9--26	2	extr=11	-	-	0	-	-	-
BC1G_07899	Y	-	M	237	19	218	4	6	0	--	2	extr=26	-	-	1	pfam01083	-	-
BC1G_07902	Y	-	M	61	17	44	0	0	0	--	-	extr=8	-	-	0	-	-	-
BC1G_07919	Y	-	M	162	17	145	2	6	0	--	2	cyto=19	-	-	0	-	KOG4245	-
BC1G_07945	Y	-	M	322	23	299	8	3	0	--	3	extr=27	-	-	0	pfam00722	-	cd02181,cd08023
BC1G_07949	Y	-	M	231	20	211	12	8	0	--	2	extr=26	-	-	0	-	-	-
BC1G_07950	Y	-	M	334	22	312	29	4	0	--	4	extr=23	-	-	1	-	-	-
BC1G_07951	Y	-	M	419	24	395	24	13	0	--	3	extr=24	-	-	0	-	-	-
BC1G_07969	Y	-	M	517	18	499	19	23	0	--	2	extr=9	-	-	1	pfam00856	-	smart00317
BC1G_07974	Y	-	M	312	23	289	4	9	0	--	2	extr=27	-	-	1	pfam00135,pfam07859	KOG1515,KOG1516,KOG4389	COG2272,cd00312
BC1G_08033	Y	-	M	370	21	349	8	2	0	--	2	extr=26	-	-	0	pfam00295	-	COG5434,PLN02155,PLN02188,PLN02218,PLN02793,PLN03003,PLN03010
BC1G_08048	Y	-	M	396	17	379	9	16	0	--	2	cyto=16	-	-	0	pfam01425	KOG1211,KOG1212	COG0154,PRK00012,PRK05962,PRK06061,PRK06102,PRK06169,PRK06170,PRK06565,PRK06707,PRK06828,PRK07056,PRK07486,PRK07487,PRK07488,PRK08137,PRK08186,PRK09201,PRK11910,PRK12470,TIGR00132,TIGR02713,TIGR02715
BC1G_08058	Y	-	M	239	19	220	4	3	0	--	4	extr=21	-	-	0	-	-	-
BC1G_08061	Y	-	M	440	18	422	9	15	0	--	5	plas=13	-	-	1	-	-	-
BC1G_08063	Y	-	M	370	18	352	4	6	0	--	4	extr=26	-	-	0	-	-	-
BC1G_08101	Y	-	M	351	22	329	1	19	0	--	2	extr=19	-	-	0	-	-	COG1073
BC1G_08106	Y	-	M	381	16	365	9	2	0	--	4	extr=25	-	-	0	-	-	-
BC1G_08110	Y	-	M	417	14	403	5	15	0	--	2	extr=27	-	-	0	pfam03022	-	-
BC1G_08114	Y	-	M	1491	25	1466	6	70	0	--	4	cyto=9.5	Y	-	4	pfam06427	KOG1879	cd00505,cd04194,cd06432
BC1G_08142	Y	-	M	43	16	27	0	3	0	--	-	mito=12.5	-	-	1	-	-	-
BC1G_08148	-	Y	M	464	17	447	4	8	0	--	3	extr=22	-	-	1	-	-	-
BC1G_08172	Y	-	M	78	16	62	1	4	1	4--21	-	mito=11	-	-	0	-	-	-
BC1G_08181	Y	-	M	284	19	265	5	7	0	--	4	extr=12	-	-	0	-	-	-
BC1G_08207	Y	-	M	829	26	803	4	34	0	--	4	extr=12	Y	-	1	pfam03200	KOG2161	COG3408
BC1G_08226	Y	-	M	349	19	330	2	17	0	--	-	mito=8	-	-	0	-	KOG2614	PRK06753,PRK07236,TIGR03219
BC1G_08228	Y	-	M	255	23	232	0	16	1	7--29	8	mito=14	-	-	0	-	-	-
BC1G_08249	Y	-	M	245	17	228	0	14	1	2--21	2	extr=8	-	-	1	pfam01522	-	COG0726,TIGR02764,TIGR02873,TIGR02884,TIGR03006,cd10585,cd10916,cd10917,cd10938,cd10940,cd10941,cd10942,cd10943,cd10944,cd10946,cd10947,cd10948,cd10949,cd10950,cd10951,cd10952,cd10953,cd10954,cd10955,cd10956,cd10958,cd10959,cd10960,cd10962,cd10967,cd10978
BC1G_08253	Y	-	M	581	18	563	10	11	0	--	2	extr=26	-	-	0	pfam07519	-	-
BC1G_08261	Y	-	M	68	37	31	2	0	1	15--37	-	plas=13	-	-	1	-	-	-
BC1G_08278	Y	-	M	227	25	202	6	7	1	7--26	2	extr=14	-	-	0	pfam04777	KOG1731,KOG3355	COG5054
BC1G_08280	Y	-	M	241	18	223	4	8	0	--	-	extr=21	-	-	1	pfam00188	KOG3017	COG2340,cd00168,cd05380,cd05381,cd05382,cd05383,cd05384,cd05385,cd05559,smart00198
BC1G_08282	Y	-	M	255	21	234	9	9	0	--	-	extr=16	-	-	1	-	-	-
BC1G_08308	Y	-	M	389	18	371	12	7	0	--	3	extr=26	-	-	0	pfam01822,pfam11790	KOG4157	smart00321
BC1G_08310	Y	-	M	92	44	48	0	3	1	13--35	-	extr=12	-	-	0	-	-	-
BC1G_08314	Y	-	M	234	23	211	5	2	0	--	-	extr=26	-	-	0	pfam01083	-	-
BC1G_08329	-	Y	M	117	19	98	1	0	2	5--27 94--116	-	extr=13	-	-	0	-	-	-
BC1G_08354	Y	-	M	620	18	602	9	12	0	--	3	extr=26	-	-	0	pfam09286	-	COG4934,cd04056,cd11377,smart00944
BC1G_08356	Y	-	M	504	22	482	2	16	1	7--24	3	extr=19	-	-	0	pfam00201	KOG1192	COG1819,PHA03392,cd03784
BC1G_08357	Y	-	M	82	18	64	8	2	0	--	-	extr=16	-	-	0	-	-	-
BC1G_08363	Y	-	M	96	18	78	10	0	0	--	-	extr=26	-	-	0	-	-	-
BC1G_08370	Y	-	M	303	19	284	5	4	0	--	-	extr=23	-	-	0	pfam00332	-	COG5309
BC1G_08372	Y	-	M	654	18	636	2	14	0	--	3	extr=24	-	-	0	pfam06964	-	COG3534,smart00813
BC1G_08393	Y	-	M	399	15	384	4	14	0	--	2	extr=25	-	-	0	pfam00026	KOG1339	PTZ00013,PTZ00147,cd05470,cd05471,cd05473,cd05477,cd05478,cd05485,cd05486,cd05487,cd05488,cd05490,cd06097,cd06098
BC1G_08412	Y	-	M	651	31	620	5	34	1	9--31	2	E.R.=7	-	-	1	-	KOG2458	smart00672
BC1G_08414	Y	-	M	172	19	153	4	0	0	--	2	extr=26	-	-	1	-	-	-
BC1G_08415	Y	-	M	491	22	469	2	32	1	7--29	2	plas=19	-	-	1	pfam00067	KOG0156,KOG0157,KOG0158,KOG0159,KOG0684	COG2124,PLN00110,PLN00168,PLN02169,PLN02183,PLN02290,PLN02302,PLN02394,PLN02426,PLN02655,PLN02687,PLN02738,PLN02936,PLN02966,PLN02971,PLN03018,PLN03112,PLN03234,PTZ00404
BC1G_08436	Y	-	M	497	28	469	3	30	1	7--29	2	extr=21	-	-	0	-	-	-
BC1G_08440	Y	-	M	40	21	19	0	1	0	--	-	extr=12	-	-	0	-	-	-
BC1G_08442	Y	-	M	174	19	155	6	5	0	--	3	extr=25	-	-	0	-	-	-
BC1G_08464	Y	-	M	842	24	818	5	36	0	--	3	extr=10	-	-	1	pfam02383,pfam12456	KOG0566,KOG1888,KOG1889,KOG1890	COG5329
BC1G_08486	Y	-	M	95	17	78	0	2	0	--	-	extr=14	-	-	0	-	-	-
BC1G_08544	Y	-	M	545	23	522	24	18	0	--	4	extr=22	-	-	1	pfam01822,pfam09362	KOG4157	smart00321
BC1G_08574	Y	-	M	286	22	264	5	3	0	--	2	extr=27	-	-	1	pfam08787	-	-
BC1G_08580	Y	-	M	168	21	147	6	4	0	--	2	extr=25	-	-	1	-	-	-
BC1G_08585	Y	-	M	503	16	487	22	18	0	--	2	extr=26	-	-	0	pfam01822,pfam09362	KOG4157	smart00321
BC1G_08603	Y	-	M	82	22	60	2	2	1	10--32	-	mito=7	-	-	0	-	-	-
BC1G_08615	Y	-	M	845	20	825	2	28	0	--	3	extr=26	-	-	0	-	-	-
BC1G_08617	Y	-	M	42	23	19	1	1	1	10--29	-	mito=17	-	-	0	-	-	-
BC1G_08621	Y	-	M	53	33	20	1	2	1	10--29	-	cysk=13	-	-	1	-	-	-
BC1G_08627	Y	-	M	512	24	488	6	24	1	7--29	2	extr=20	-	-	0	-	-	cd11296
BC1G_08635	Y	-	M	208	19	189	4	4	0	--	3	extr=26	-	-	1	-	-	-
BC1G_08638	Y	-	M	221	19	202	4	3	0	--	2	extr=25	-	-	0	-	-	-
BC1G_08658	Y	-	M	424	21	403	4	10	0	--	2	extr=25	-	-	0	pfam00246	KOG2649,KOG2650	COG2866,cd00596,cd03856,cd03858,cd03859,cd03860,cd03868,cd03870,cd03871,cd03872,cd06226,cd06227,cd06228,cd06229,cd06237,cd06245,cd06246,cd06247,cd06248,cd06905,smart00631
BC1G_08683	Y	-	M	125	28	97	1	12	1	15--37	-	mito=6	-	-	0	pfam01679	-	-
BC1G_08692	Y	-	M	220	21	199	6	8	0	--	-	extr=27	-	-	0	pfam03443	-	-
BC1G_08693	Y	-	M	4317	16	4301	41	252	0	--	4	cyto_nucl=7.5	-	-	4	pfam03028,pfam07728,pfam08385,pfam08393,pfam12774,pfam12775,pfam12777,pfam12780,pfam12781,pfam13666	KOG3595	COG0714,COG5245,cd00009
BC1G_08735	Y	-	M	151	19	132	5	4	0	--	-	extr=27	-	-	0	pfam07249	-	-
BC1G_08738	Y	-	M	198	31	167	9	14	0	--	-	nucl=11.5	-	-	0	-	-	-
BC1G_08748	Y	-	M	493	17	476	4	9	0	--	3	extr=26	-	-	1	-	-	-
BC1G_08749	Y	-	M	208	19	189	1	4	0	--	3	extr=18	-	-	1	-	-	-
BC1G_08751	Y	-	M	208	19	189	1	4	0	--	3	extr=18	-	-	1	-	-	-
BC1G_08755	Y	-	M	542	19	523	6	23	0	--	2	extr=27	-	-	0	pfam00686,pfam00723	-	cd05467,cd05807,cd05808,cd05811,smart01065
BC1G_08757	Y	-	M	602	18	584	10	13	0	--	4	extr=25	-	-	2	pfam08450	KOG1520	COG3386
BC1G_08771	Y	-	M	416	25	391	6	22	1	13--35	2	mito=9	-	-	1	-	-	PRK06849
BC1G_08784	Y	-	M	624	19	605	4	26	0	--	3	extr=15	-	-	0	-	KOG4419	COG0737,cd00845,cd07407,cd07408,cd07410,cd07411
BC1G_08801	Y	-	M	706	21	685	2	23	0	--	4	extr=23	-	-	2	-	-	-
BC1G_08811	Y	-	M	238	21	217	3	11	0	--	2	mito=12	-	-	0	pfam00153	KOG0036,KOG0749,KOG0751,KOG0752,KOG0753,KOG0754,KOG0755,KOG0756,KOG0757,KOG0758,KOG0759,KOG0760,KOG0761,KOG0762,KOG0763,KOG0764,KOG0767,KOG0768,KOG0769	-
BC1G_08815	Y	-	M	477	20	457	6	29	0	--	2	cyto=8	-	-	1	pfam00026	KOG1339	PTZ00013,PTZ00147,PTZ00165,cd05470,cd05471,cd05474,cd05477,cd05478,cd05485,cd05486,cd05487,cd05488,cd05490,cd06097,cd06098
BC1G_08831	Y	-	M	669	16	653	11	16	0	--	4	extr=25	-	-	0	pfam00450	KOG1282,KOG1283	COG2939,PLN02209,PLN03016,PTZ00472
BC1G_08858	-	Y	M	230	18	212	0	3	0	--	5	extr=21	-	-	1	-	-	-
BC1G_08861	-	Y	M	204	19	185	0	0	0	--	5	extr=26	-	-	0	-	-	-
BC1G_08890	Y	-	M	330	24	306	0	8	0	--	-	extr=17	-	-	1	pfam00753	-	COG0491,smart00849
BC1G_08904	Y	-	M	313	20	293	1	18	0	--	3	extr=26	-	-	0	-	-	-
BC1G_08911	Y	-	M	56	19	37	1	3	0	--	-	extr=19	-	-	0	-	-	-
BC1G_08917	-	Y	M	294	21	273	10	2	0	--	2	extr=24	-	-	0	-	-	-
BC1G_08924	Y	-	M	291	27	264	2	5	0	--	4	extr=25	-	-	1	pfam00722	-	COG2273,cd00413,cd02181,cd02182,cd08023,cd08024
BC1G_08931	Y	-	M	246	16	230	2	5	0	--	2	extr=24	-	-	0	pfam11327	-	-
BC1G_08975	Y	-	M	792	21	771	7	20	0	--	3	extr=26	-	-	1	-	-	-
BC1G_08989	Y	-	M	457	19	438	10	6	0	--	3	extr=27	-	-	0	pfam01341	-	COG5297
BC1G_08990	Y	-	M	411	19	392	12	6	0	--	2	extr=26	-	-	0	pfam00150,pfam00734	-	COG2730,smart00236
BC1G_08991	Y	-	M	64	31	33	2	2	1	5--24	-	plas=14	-	-	0	-	-	-
BC1G_09000	Y	-	M	291	19	272	0	7	0	--	2	extr=23	-	-	0	pfam00544	-	COG3866,smart00656
BC1G_09003	Y	-	M	77	28	49	0	6	1	7--29	-	mito=8	-	-	0	-	-	-
BC1G_09009	Y	-	M	53	25	28	1	7	0	--	2	mito=12.5	-	-	0	-	-	-
BC1G_09013	Y	-	M	570	19	551	4	17	0	--	3	extr=26	-	-	3	pfam00135	KOG1515,KOG1516,KOG2100,KOG4389	COG0657,COG2272,cd00312
BC1G_09016	-	Y	M	295	20	275	10	1	0	--	4	extr=27	-	-	0	-	-	-
BC1G_09025	Y	-	M	42	18	24	0	2	0	--	-	mito=14	-	-	1	-	-	-
BC1G_09029	Y	-	M	406	17	389	4	20	0	--	3	extr=21	-	-	0	pfam00491	KOG2964,KOG2965	COG0010,PLN02615,PRK01722,PRK02190,PRK13775,TIGR01227,TIGR01229,TIGR01230
BC1G_09034	Y	-	M	99	28	71	0	4	0	--	-	cyto=13.5	-	-	1	-	-	-
BC1G_09046	Y	-	M	524	34	490	4	26	1	7--29	2	plas=11	-	-	0	pfam00067	KOG0156,KOG0157,KOG0158,KOG0159,KOG0684	COG2124,PLN02196,PLN02290,PLN02738,PLN02936,PLN02987
BC1G_09054	Y	-	M	151	18	133	4	4	0	--	-	extr=26	-	-	0	-	-	-
BC1G_09079	-	Y	M	453	18	435	2	5	0	--	5	extr=25	-	-	0	-	-	COG5309
BC1G_09084	Y	-	M	139	17	122	8	1	0	--	2	extr=24	-	-	1	-	-	-
BC1G_09106	Y	-	M	329	21	308	2	2	0	--	3	extr=24	-	-	1	-	-	-
BC1G_09109	-	Y	M	157	26	131	4	5	1	9--31	2	plas=17	-	-	1	-	-	-
BC1G_09121	Y	-	M	587	24	563	7	20	0	--	3	extr=24	-	-	1	pfam00135,pfam07859	KOG1515,KOG1516,KOG4389	COG0657,COG2272,cd00312
BC1G_09122	Y	-	M	342	20	322	0	15	0	--	2	extr=21	-	-	0	-	-	COG1840
BC1G_09124	Y	-	M	319	18	301	1	9	0	--	-	extr=14	-	-	0	pfam00753	-	COG0491,smart00849
BC1G_09125	Y	-	M	458	24	434	2	8	1	9--31	3	extr=23	-	-	1	pfam00890,pfam13450	-	COG1249,PRK05249
BC1G_09129	Y	-	M	416	18	398	8	22	0	--	2	extr=11	Y	-	1	pfam00226,pfam00684,pfam01556	KOG0550,KOG0624,KOG0691,KOG0712,KOG0713,KOG0714,KOG0715,KOG0716,KOG0717,KOG0718,KOG0719,KOG0720,KOG0721,KOG0722,KOG1789	COG0484,COG2214,COG5407,PRK09430,PRK10266,PRK10767,PRK14276,PRK14277,PRK14278,PRK14279,PRK14280,PRK14281,PRK14282,PRK14283,PRK14284,PRK14285,PRK14286,PRK14287,PRK14288,PRK14289,PRK14290,PRK14291,PRK14292,PRK14293,PRK14294,PRK14295,PRK14296,PRK14297,PRK14298,PRK14299,PRK14300,PRK14301,PTZ00037,PTZ00341,TIGR02349,TIGR03835,cd06257,cd10719,cd10747,smart00271
BC1G_09146	Y	-	M	810	21	789	12	11	0	--	4	extr=26	-	-	0	pfam01522	-	COG0726,TIGR02764,TIGR02873,cd10917,cd10944,cd10947,cd10950,cd10951,cd10952,cd10953,cd10954,cd10956,cd10959,cd10962,cd10967
BC1G_09147	Y	-	M	109	19	90	2	8	0	--	-	nucl=10.5	-	-	2	-	-	-
BC1G_09165	Y	-	M	37	18	19	0	0	0	--	-	extr=11	-	-	0	-	-	-
BC1G_09171	-	Y	M	238	18	220	9	7	1	214--236	2	extr=20	-	-	0	-	-	-
BC1G_09180	Y	-	M	353	17	336	8	9	0	--	3	extr=24	-	-	0	pfam02102	-	cd11008
BC1G_09182	Y	-	M	563	20	543	7	22	1	2--24	3	extr=18	-	-	0	pfam05577	KOG2182,KOG2183	-
BC1G_09190	Y	-	M	635	22	613	7	15	0	--	2	extr=26	-	-	0	pfam01565,pfam08031	-	-
BC1G_09203	Y	-	M	187	19	168	0	7	0	--	7	cyto=7	-	-	0	-	-	-
BC1G_09206	Y	-	M	456	27	429	5	21	1	11--28	3	extr=9	-	-	0	-	-	cd11296
BC1G_09210	Y	-	M	379	19	360	5	5	0	--	3	extr=25	-	-	0	pfam00150	-	COG2730
BC1G_09213	Y	-	M	33	22	11	0	0	1	7--29	-	cyto=25	-	-	0	-	-	-
BC1G_09215	Y	-	M	171	19	152	0	5	0	--	3	extr=9	-	-	0	-	-	-
BC1G_09240	Y	-	M	455	22	433	1	10	0	--	4	extr=25	-	-	0	pfam00190,pfam07883	-	COG0662,COG2140,TIGR03404,smart00835
BC1G_09275	Y	-	M	146	21	125	2	9	0	--	-	mito=18	-	-	0	-	-	-
BC1G_09299	Y	-	M	357	25	332	1	17	1	12--34	3	extr=6	-	-	1	pfam00067	KOG0156,KOG0157,KOG0158,KOG0159,KOG0684	COG2124,PLN00110,PLN00168,PLN02183,PLN02394,PLN02655,PLN02687,PLN03112,PLN03234,PTZ00404
BC1G_09300	Y	-	M	159	25	134	1	9	1	10--29	-	plas=16	-	-	0	-	-	-
BC1G_09323	Y	-	M	56	34	22	1	1	1	10--32	2	mito=11	-	-	0	-	-	-
BC1G_09358	Y	-	M	62	24	38	0	3	0	--	2	plas=11	-	-	0	-	-	-
BC1G_09364	Y	-	M	436	22	414	3	12	0	--	2	extr=24	-	-	0	pfam01328	-	-
BC1G_09391	Y	-	M	535	17	518	3	8	0	--	2	extr=26	-	-	0	pfam00135	KOG1516,KOG4389	COG2272,cd00312
BC1G_09406	Y	-	M	271	16	255	3	6	0	--	3	extr=17	-	-	0	pfam00194	KOG0382	COG3338,PLN02179,PLN02202,cd00326,cd03117,cd03118,cd03119,cd03120,cd03121,cd03122,cd03123,cd03124,cd03125,cd03126,cd03150,smart01057
BC1G_09416	Y	-	M	175	27	148	2	6	0	--	-	extr=11	-	-	0	-	-	-
BC1G_09419	Y	-	M	108	25	83	5	3	0	--	2	mito=11	-	-	0	-	-	-
BC1G_09438	Y	-	M	122	18	104	3	8	0	--	-	mito=13	-	-	0	-	-	-
BC1G_09493	Y	-	M	377	23	354	2	14	0	--	3	cyto=16.5	-	-	0	pfam00107,pfam08240	KOG0022,KOG0023,KOG0024	COG0604,COG1062,COG1063,COG1064,PLN02702,PLN02740,PLN02827,PRK05396,PRK09422,PRK09880,PRK10083,PRK10309,PRK13771,TIGR00692,TIGR02818,TIGR02819,TIGR02824,TIGR03451,TIGR03989,cd05188,cd05278,cd05279,cd05281,cd05283,cd05284,cd05285,cd05289,cd08231,cd08232,cd08233,cd08234,cd08235,cd08236,cd08239,cd08240,cd08241,cd08245,cd08254,cd08255,cd08256,cd08258,cd08259,cd08260,cd08261,cd08262,cd08263,cd08264,cd…
BC1G_09495	Y	-	M	513	23	490	10	13	0	--	2	extr=27	-	-	1	pfam07519	-	-
BC1G_09503	Y	-	M	502	31	471	6	30	1	13--32	2	plas=12	-	-	0	pfam00067	KOG0156,KOG0157,KOG0158,KOG0159,KOG0684	COG2124,PLN00110,PLN00168,PLN02169,PLN02183,PLN02196,PLN02290,PLN02302,PLN02394,PLN02426,PLN02500,PLN02655,PLN02687,PLN02738,PLN02774,PLN02936,PLN02966,PLN02971,PLN02987,PLN03018,PLN03112,PLN03195,PLN03234,PTZ00404
BC1G_09515	Y	-	M	98	16	82	1	5	0	--	2	plas=11	-	-	1	-	-	-
BC1G_09540	Y	-	M	137	26	111	6	3	0	--	2	extr=11	-	-	0	-	-	-
BC1G_09541	Y	-	M	501	23	478	3	28	1	2--24	2	extr=10	-	-	0	pfam00067	KOG0156,KOG0157,KOG0158,KOG0159,KOG0684	COG2124,PLN02290,PLN02774,PTZ00404
BC1G_09544	Y	-	M	1655	32	1623	8	124	1	7--29	3	nucl=9.5	-	-	6	pfam10293,pfam10305,pfam10344,pfam10347,pfam10359	KOG1910	-
BC1G_09556	Y	-	M	64	26	38	1	0	1	7--29	-	mito=9	-	-	1	-	-	-
BC1G_09558	Y	-	M	80	20	60	1	5	0	--	-	cysk=17	-	-	0	-	-	-
BC1G_09563	Y	-	M	366	18	348	4	6	0	--	3	extr=12	-	-	0	pfam00085,pfam07749,pfam13098	KOG0190,KOG0191,KOG0907,KOG0908,KOG0910,KOG0912,KOG0913,KOG1731,KOG4277	COG0526,COG3118,PLN02309,PRK09381,PRK10996,PTZ00051,PTZ00102,PTZ00443,TIGR00424,TIGR01068,TIGR01126,TIGR01130,cd00238,cd01659,cd02947,cd02949,cd02950,cd02953,cd02956,cd02961,cd02966,cd02992,cd02993,cd02994,cd02995,cd02996,cd02997,cd02998,cd02999,cd03000,cd03001,cd03002,cd03003,cd03004,cd03005,cd03011
BC1G_09564	Y	-	M	544	18	526	7	17	0	--	2	extr=26	-	-	0	pfam05577	KOG2182,KOG2183	-
BC1G_09565	Y	-	M	411	18	393	4	5	0	--	2	extr=25	-	-	0	pfam05577	KOG2182,KOG2183	-
BC1G_09585	Y	-	M	505	22	483	4	38	0	--	3	mito=14.5	-	-	1	pfam03853,pfam09532	KOG2585	-
BC1G_09594	Y	-	M	320	17	303	5	3	0	--	4	extr=27	-	-	0	pfam00188	KOG3017	cd00168,cd05380,cd05381,cd05382,cd05383,cd05384,cd05385,cd05559,smart00198
BC1G_09602	Y	-	M	688	36	652	4	33	0	--	3	extr=11	-	-	1	pfam00561,pfam04083	KOG2624	PLN02872
BC1G_09611	Y	-	M	423	17	406	8	20	0	--	2	cyto=12	-	-	0	pfam01266	KOG2852	COG0665
BC1G_09613	Y	-	M	333	18	315	0	13	0	--	2	extr=18	-	-	2	pfam03345	KOG2754	-
BC1G_09619	Y	-	M	122	18	104	4	18	0	--	2	cyto=8.5	-	-	0	-	-	-
BC1G_09644	Y	-	M	556	18	538	6	20	0	--	3	extr=25	-	-	0	pfam00135	KOG1515,KOG1516,KOG4389	COG0657,COG2272,cd00312
BC1G_09656	Y	-	M	514	20	494	2	5	0	--	4	extr=25	-	-	0	-	-	-
BC1G_09657	Y	-	M	328	18	310	4	6	0	--	-	extr=21	-	-	1	-	-	-
BC1G_09674	Y	-	M	401	20	381	2	28	0	--	2	plas=14	-	-	1	-	-	-
BC1G_09694	Y	-	M	547	20	527	7	11	0	--	2	extr=27	-	-	1	pfam00135,pfam07859	KOG1515,KOG1516,KOG4389	COG0657,COG2272,cd00312
BC1G_09730	Y	-	M	3251	45	3206	22	171	1	16--38	3	plas=13	-	-	5	-	KOG3596	-
BC1G_09734	Y	-	M	38	26	12	0	0	1	7--29	-	plas=8	-	-	1	-	-	-
BC1G_09749	Y	-	M	397	22	375	1	26	0	--	4	extr=13	-	-	0	-	-	-
BC1G_09775	Y	-	M	259	22	237	4	6	1	5--27	3	extr=24	-	-	1	pfam01083	-	-
BC1G_09787	Y	-	M	256	18	238	0	20	0	--	8	mito=17.5	-	-	0	-	-	-
BC1G_09789	Y	-	M	540	21	519	2	12	0	--	8	extr=19	-	-	0	-	-	-
BC1G_09791	Y	-	M	454	18	436	4	10	0	--	3	extr=27	-	-	1	-	-	-
BC1G_09803	Y	-	M	314	23	291	4	2	0	--	5	extr=25	-	-	0	-	-	-
BC1G_09829	Y	-	M	333	21	312	9	8	0	--	2	extr=25	-	-	0	-	-	cd02181,cd08023
BC1G_09848	Y	-	M	270	22	248	2	13	0	--	3	mito=10	-	-	0	pfam13883	-	-
BC1G_09860	Y	-	M	483	16	467	1	10	0	--	3	cyto=14.5	-	-	1	pfam02469	KOG1437	COG2335,smart00554
BC1G_09866	Y	-	M	233	25	208	3	12	1	12--34	2	cyto=9	-	-	0	pfam01981	KOG3282	COG1990,PRK04322,TIGR00283,cd02407,cd02430
BC1G_09883	Y	-	M	417	18	399	6	7	0	--	2	extr=25	-	-	0	pfam12697	KOG1454	-
BC1G_09886	Y	-	M	43	31	12	0	0	0	--	-	mito=14	-	-	0	-	-	-
BC1G_09892	Y	-	M	357	16	341	10	4	0	--	2	extr=27	-	-	0	pfam09792	-	-
BC1G_09894	Y	-	M	122	22	100	0	7	1	13--35	-	cysk=13	-	-	0	-	-	-
BC1G_09906	Y	-	M	59	22	37	0	2	1	5--27	-	extr=14	-	-	0	-	-	-
BC1G_09929	Y	-	M	52	29	23	0	0	0	--	-	cyto=8.5	-	-	1	-	-	-
BC1G_09940	Y	-	M	537	23	514	4	30	1	7--24	3	extr=12	-	-	0	pfam06101	-	-
BC1G_09954	Y	-	M	41	20	21	0	1	0	--	-	extr=8	-	-	0	-	-	-
BC1G_09963	Y	-	M	103	16	87	4	4	0	--	-	extr=11	-	-	0	-	-	-
BC1G_09964	Y	-	M	83	25	58	1	4	1	5--27	-	plas=18	-	-	1	-	-	-
BC1G_09968	Y	-	M	163	23	140	7	4	0	--	-	extr=23	-	-	0	-	-	-
BC1G_09991	Y	-	M	894	21	873	15	7	0	--	5	extr=24	-	-	0	-	-	cd02181,cd08023
BC1G_09997	Y	-	M	594	19	575	6	20	0	--	3	extr=25	-	-	0	pfam01425	KOG1211,KOG1212	COG0154,PLN02722,PRK00012,PRK05962,PRK06061,PRK06102,PRK06169,PRK06170,PRK06529,PRK06565,PRK06707,PRK06828,PRK07042,PRK07056,PRK07139,PRK07235,PRK07486,PRK07487,PRK07488,PRK07869,PRK08137,PRK08186,PRK08310,PRK09201,PRK11910,PRK12470,TIGR00132,TIGR02713,TIGR02715
BC1G_10004	Y	-	M	83	15	68	3	2	0	--	-	extr=11	-	-	0	-	-	-
BC1G_10024	-	Y	M	147	29	118	4	5	1	7--29	-	extr=12	-	-	1	-	-	-
BC1G_10030	Y	-	M	60	17	43	3	4	0	--	-	extr=13	-	-	0	-	-	-
BC1G_10070	Y	-	M	133	19	114	2	4	0	--	-	extr=9	-	-	0	-	-	-
BC1G_10075	Y	-	M	386	23	363	3	13	0	--	3	extr=20	-	-	0	pfam04909	KOG4245	COG2159
BC1G_10091	Y	-	M	512	19	493	6	16	0	--	-	extr=26	-	-	0	pfam00135,pfam07859	KOG1515,KOG1516,KOG4389	COG0657,COG2272,cd00312
BC1G_10095	Y	-	M	521	17	504	4	12	0	--	2	extr=26	-	-	0	pfam13668	-	-
BC1G_10122	Y	-	M	102	19	83	0	4	0	--	3	mito=11	-	-	0	-	-	-
BC1G_10128	Y	-	M	30	16	14	0	2	0	--	-	plas=10	-	-	0	-	-	-
BC1G_10136	Y	-	M	32	22	10	0	2	0	--	-	mito=15	-	-	0	-	-	-
BC1G_10164	Y	-	M	346	19	327	3	14	0	--	2	extr=22	-	-	1	pfam00300	KOG4754	COG0406,cd07040,cd07067,smart00855
BC1G_10221	Y	-	M	887	19	868	8	24	0	--	3	extr=26	-	-	1	pfam00933,pfam01915,pfam14310	-	COG1472,PLN03080,PRK15098
BC1G_10229	Y	-	M	353	20	333	8	7	0	--	3	extr=23	-	-	0	pfam03211	-	-
BC1G_10231	Y	-	M	888	21	867	8	25	0	--	4	extr=27	-	-	2	pfam00933,pfam01915,pfam14310	-	COG1472,PLN03080,PRK05337,PRK15098
BC1G_10246	Y	-	M	192	19	173	4	4	0	--	2	extr=26	-	-	0	-	-	-
BC1G_10247	Y	-	M	511	18	493	2	17	0	--	2	extr=25	-	-	0	pfam00251	KOG0228	COG1621,TIGR01322,cd08772,cd08979,cd08995,cd08996,smart00640
BC1G_10252	Y	-	M	106	14	92	0	10	1	4--23	-	extr=9	-	-	0	-	KOG0723	PTZ00100
BC1G_10258	Y	-	M	88	20	68	3	3	0	--	-	mito=15	-	-	0	-	-	-
BC1G_10266	Y	-	M	119	33	86	4	8	1	12--34	-	mito=8	-	-	0	-	-	-
BC1G_10281	-	Y	M	457	25	432	7	8	1	434--456	3	extr=25	-	-	0	pfam03663	-	-
BC1G_10306	Y	-	M	244	21	223	4	3	0	--	2	extr=25	-	-	0	pfam05630	-	-
BC1G_10322	Y	-	M	319	18	301	4	2	0	--	3	extr=26	-	-	2	pfam04616	-	cd08772,cd08978,cd08988,cd08990,cd08991,cd08998,cd08999
BC1G_10326	Y	-	M	157	19	138	3	5	1	5--22	-	extr=23	-	-	0	-	-	-
BC1G_10329	Y	-	M	663	15	648	10	14	0	--	3	extr=27	-	-	0	pfam00394,pfam07731,pfam07732	KOG1263	COG2132,PLN00044,PLN02168,PLN02191,PLN02354,PLN02604,PLN02792,PLN02835,PLN02991,PRK10965,TIGR01480,TIGR03388,TIGR03389,TIGR03390
BC1G_10330	Y	-	M	408	24	384	6	14	0	--	4	extr=15	-	283--297	0	-	-	-
BC1G_10331	Y	-	M	521	16	505	6	15	1	5--27	3	extr=24	-	-	1	pfam00135,pfam07859	KOG1515,KOG1516,KOG4389	COG0657,COG2272,cd00312
BC1G_10333	Y	-	M	157	22	135	3	12	0	--	2	cyto_nucl=12.333	-	-	0	-	-	COG0300,COG3967,COG4221,PRK05653,PRK05866,PRK10538,cd05233,cd05346,cd05370,cd08939
BC1G_10341	Y	-	M	471	24	447	1	8	0	--	2	extr=25	-	-	1	pfam02156	-	COG4124,cd04083,cd04086
BC1G_10360	Y	-	M	59	19	40	0	2	0	--	-	mito=17	-	-	0	-	-	-
BC1G_10379	Y	-	M	386	17	369	12	3	0	--	2	extr=26	-	-	0	-	-	-
BC1G_10381	Y	-	M	1169	22	1147	16	58	0	--	10	extr=25	-	-	1	-	-	cd11618
BC1G_10385	Y	-	M	42	23	19	0	1	0	--	-	mito=15	-	-	1	-	-	-
BC1G_10397	Y	-	M	414	20	394	6	6	0	--	2	extr=26	-	-	0	-	-	cd08557,cd08588,cd08590
BC1G_10402	-	Y	M	194	17	177	0	1	0	--	2	extr=25	-	-	0	-	-	-
BC1G_10445	Y	-	M	99	29	70	3	4	0	--	-	extr=24	-	-	0	-	-	-
BC1G_10455	-	Y	M	457	18	439	6	13	0	--	3	extr=26	-	-	0	pfam03198	-	-
BC1G_10456	Y	-	M	71	21	50	0	5	0	--	-	nucl=12.5	-	-	0	-	-	-
BC1G_10462	Y	-	M	133	19	114	2	4	0	--	3	extr=20	-	-	0	-	-	-
BC1G_10466	Y	-	M	448	19	429	10	7	0	--	5	extr=26	-	-	0	-	-	-
BC1G_10473	Y	-	M	734	21	713	6	8	0	--	5	extr=26	-	-	1	-	-	-
BC1G_10475	Y	-	M	409	17	392	6	12	0	--	2	extr=27	-	-	0	-	-	-
BC1G_10482	Y	-	M	170	22	148	1	10	0	--	-	cyto=7	-	-	1	-	-	-
BC1G_10486	Y	-	M	507	19	488	3	10	0	--	3	extr=25	-	-	0	-	-	-
BC1G_10504	Y	-	M	107	19	88	0	2	0	--	-	extr=11	-	-	0	-	-	-
BC1G_10507	Y	-	M	322	22	300	2	26	1	12--30	2	cyto=7	-	-	0	-	-	-
BC1G_10516	Y	-	M	129	19	110	0	6	0	--	3	extr=7	-	-	0	-	-	-
BC1G_10556	Y	-	M	61	22	39	0	5	0	--	-	nucl=17	-	-	0	-	-	-
BC1G_10620	Y	-	M	79	33	46	0	1	1	10--27	-	E.R.=8	-	-	0	-	-	-
BC1G_10626	Y	-	M	220	32	188	0	7	1	10--32	2	cyto_nucl=7.5	-	-	1	-	KOG0874	-
BC1G_10630	-	Y	M	403	18	385	4	2	0	--	6	extr=26	-	-	1	-	-	-
BC1G_10644	Y	-	M	209	16	193	4	21	0	--	2	extr=6	-	185--201	0	-	-	-
BC1G_10692	Y	-	M	38	22	16	0	0	1	4--26	-	plas=8	-	-	0	-	-	-
BC1G_10693	Y	-	M	47	25	22	2	0	0	--	-	cysk=16	-	-	0	-	-	-
BC1G_10695	Y	-	M	328	18	310	8	9	0	--	2	extr=26	-	-	0	-	-	-
BC1G_10722	Y	-	M	132	19	113	0	12	1	2--21	-	E.R.=8	-	-	1	pfam09435	-	-
BC1G_10727	Y	-	M	111	19	92	2	2	0	--	-	extr=15	-	-	1	-	-	-
BC1G_10768	Y	-	M	386	21	365	4	16	0	--	2	extr=26	-	-	0	pfam00775	-	COG3485,cd00421,cd03457,cd03458,cd03459,cd03460,cd03461,cd03463
BC1G_10776	-	Y	M	239	18	221	8	1	0	--	2	extr=24	-	-	0	-	-	-
BC1G_10787	Y	-	M	332	18	314	3	14	0	--	-	cyto=14.5	-	-	0	pfam08241,pfam08242,pfam12847,pfam13489,pfam13649,pfam13659,pfam13847	-	COG2226,COG4106,PLN02336,TIGR02072,cd02440
BC1G_10788	Y	-	M	492	16	476	0	11	0	--	2	extr=26	-	-	0	pfam00732,pfam05199	KOG1238	COG2303,PLN02785,PRK02106,PRK06370,TIGR01810,TIGR03970
BC1G_10789	Y	-	M	320	18	302	2	5	0	--	2	extr=26	-	-	0	pfam03664	-	cd08987
BC1G_10791	Y	-	M	316	18	298	8	11	0	--	-	extr=24	-	-	0	pfam13933	-	cd11008,cd11307
BC1G_10797	Y	-	M	519	21	498	3	18	0	--	3	extr=27	-	-	0	pfam04616	-	COG3507,cd08772,cd08978,cd08988,cd08989,cd08991,cd09000,cd09001,cd09002
BC1G_10799	Y	-	M	106	22	84	1	2	0	--	-	mito=11	-	-	0	-	-	-
BC1G_10816	-	Y	M	308	20	288	5	9	0	--	2	extr=26	-	-	0	-	-	-
BC1G_10827	Y	-	M	715	21	694	3	14	0	--	3	extr=24	-	-	0	pfam08760	-	-
BC1G_10845	Y	-	M	500	24	476	8	23	0	--	3	cyto=7.5	-	-	3	pfam00012	KOG0100,KOG0101,KOG0102	CHL00094,COG0443,PLN03184,PRK00290,PRK01433,PRK05183,PRK13410,PRK13411,PTZ00009,PTZ00186,PTZ00400,TIGR01991,TIGR02350
BC1G_10852	Y	-	M	604	25	579	16	31	0	--	3	mito=7	-	-	1	pfam04137	KOG2608	COG5061
BC1G_10861	Y	-	M	112	17	95	4	5	0	--	-	extr=22	-	-	0	-	-	-
BC1G_10872	Y	-	M	354	16	338	2	9	0	--	3	extr=25	-	-	0	pfam12006	-	-
BC1G_10876	Y	-	M	315	22	293	4	6	1	7--24	3	extr=23	-	-	0	pfam13668	-	-
BC1G_10880	Y	-	M	450	16	434	18	8	0	--	3	extr=26	-	-	0	pfam00840	-	cd07999
BC1G_10935	Y	-	M	262	18	244	1	5	1	7--29	5	extr=21	-	-	0	pfam05390	-	-
BC1G_10940	Y	-	M	272	25	247	2	18	1	2--24	3	extr=11	-	-	0	-	KOG1591	PLN00052,smart00702
BC1G_10984	Y	-	M	282	22	260	4	13	0	--	2	mito=8	-	-	1	pfam02585	KOG3332	COG2120
BC1G_11014	Y	-	M	329	30	299	3	14	0	--	2	cyto=16	-	-	1	-	-	-
BC1G_11018	-	Y	M	441	20	421	6	7	0	--	2	extr=26	-	-	1	pfam03663	-	-
BC1G_11019	Y	-	M	428	18	410	6	25	0	--	2	extr=14	-	-	1	pfam01494	KOG2614	COG0654,PLN02927,PRK06475,PRK06847,PRK07494,PRK07538,PRK08163,TIGR03219
BC1G_11043	Y	-	M	132	16	116	3	11	0	--	2	cysk=19	-	-	0	-	-	-
BC1G_11045	Y	-	M	127	27	100	4	9	0	--	-	plas=10	-	-	0	-	-	-
BC1G_11063	Y	-	M	157	17	140	3	10	0	--	-	cysk=14	-	-	0	-	-	-
BC1G_11080	Y	-	M	208	17	191	0	0	0	--	2	extr=24	-	-	0	-	-	-
BC1G_11105	Y	-	M	68	18	50	2	5	0	--	-	nucl=15	-	-	0	-	-	-
BC1G_11111	Y	-	M	709	23	686	4	27	1	7--24	3	extr=8	-	-	1	pfam11885	-	-
BC1G_11115	Y	-	M	456	18	438	4	19	0	--	3	extr=23	-	-	0	pfam01055,pfam13802	KOG1065,KOG1066	COG1501,PLN02763,cd06589,cd06591,cd06600,cd06601,cd06602,cd06603,cd06604
BC1G_11130	Y	-	M	72	28	44	1	0	1	12--34	-	plas=7	-	-	0	-	-	-
BC1G_11134	Y	-	M	296	17	279	6	4	0	--	4	extr=24	-	-	0	pfam01975	-	COG0496,PRK00346,PRK13933,TIGR00087
BC1G_11139	Y	-	M	522	18	504	5	20	0	--	3	extr=24	-	-	1	pfam13449	-	COG4222
BC1G_11143	Y	-	M	382	20	362	8	3	0	--	5	extr=27	-	-	0	pfam00295	-	COG5434,PLN02155,PLN02188,PLN02218,PLN02793,PLN03003,PLN03010
BC1G_11144	Y	-	M	327	16	311	3	6	0	--	3	extr=26	-	-	0	pfam01095	-	COG4677,PLN02170,PLN02176,PLN02197,PLN02201,PLN02217,PLN02301,PLN02304,PLN02313,PLN02314,PLN02416,PLN02432,PLN02468,PLN02480,PLN02484,PLN02488,PLN02497,PLN02506,PLN02634,PLN02665,PLN02671,PLN02682,PLN02698,PLN02708,PLN02713,PLN02745,PLN02773,PLN02916,PLN02933,PLN02990,PLN02995,PLN03043
BC1G_11148	Y	-	M	70	29	41	1	3	1	15--37	-	mito=8	-	-	0	-	-	-
BC1G_11154	-	Y	M	468	27	441	26	20	0	--	4	extr=16	-	-	1	-	-	-
BC1G_11157	Y	-	M	401	20	381	6	32	0	--	-	extr=7	-	-	0	-	-	-
BC1G_11162	Y	-	M	100	23	77	1	6	0	--	-	mito=13.5	-	-	0	-	-	-
BC1G_11196	Y	-	M	182	19	163	5	19	0	--	-	cyto=11	-	-	0	-	-	-
BC1G_11201	-	Y	M	143	17	126	0	1	0	--	2	extr=24	-	-	0	-	-	-
BC1G_11249	Y	-	M	72	23	49	1	2	0	--	-	extr=16	-	-	0	-	-	-
BC1G_11259	Y	-	M	83	19	64	0	1	0	--	-	extr=18	-	-	1	-	-	-
BC1G_11265	Y	-	M	241	20	221	3	15	0	--	2	nucl=9.5	-	-	1	-	-	-
BC1G_11266	Y	-	M	589	18	571	7	17	0	--	2	extr=24	-	-	0	pfam00394,pfam07731,pfam07732	KOG1263	COG2132,PLN00044,PLN02168,PLN02191,PLN02354,PLN02604,PLN02792,PLN02835,PLN02991,PRK10965,TIGR01480,TIGR03388,TIGR03389,TIGR03390
BC1G_11278	Y	-	M	95	32	63	1	1	1	20--42	-	extr=15	-	-	0	-	-	-
BC1G_11288	Y	-	M	387	22	365	3	9	0	--	3	extr=24	-	-	1	pfam01156	KOG2938	COG1957,PLN02717,PRK09955,PRK10443,PRK10768,cd00455,cd02647,cd02649,cd02650,cd02651,cd02653,cd02654
BC1G_11293	Y	-	M	84	24	60	4	7	1	4--26	-	cyto=8	-	-	0	-	-	-
BC1G_11297	Y	-	M	55	22	33	0	2	0	--	-	extr=9	-	-	0	-	-	-
BC1G_11302	Y	-	M	326	17	309	1	5	0	--	-	extr=20	-	-	1	pfam13668	-	-
BC1G_11306	Y	-	M	509	22	487	8	13	0	--	5	extr=25	-	-	0	pfam00328	KOG1382	cd07061
BC1G_11308	Y	-	M	47	22	25	1	2	0	--	-	mito=12	-	-	0	-	-	-
BC1G_11309	Y	-	M	224	21	203	6	8	0	--	-	nucl=8.5	-	-	0	-	-	-
BC1G_11329	Y	-	M	523	28	495	9	33	0	--	-	mito=13.5	-	-	1	pfam00067	KOG0156,KOG0157,KOG0158,KOG0159,KOG0684	COG2124,PLN00110,PLN00168,PLN02169,PLN02183,PLN02196,PLN02290,PLN02302,PLN02394,PLN02426,PLN02500,PLN02655,PLN02687,PLN02738,PLN02936,PLN02966,PLN03018,PLN03112,PLN03195,PLN03234,PTZ00404
BC1G_11343	Y	-	M	530	25	505	6	21	0	--	3	extr=16	-	-	0	pfam00226	KOG0547,KOG0550,KOG0624,KOG0691,KOG0712,KOG0713,KOG0714,KOG0715,KOG0716,KOG0717,KOG0718,KOG0719,KOG0720,KOG0721,KOG0722,KOG4626	COG0484,COG2214,COG5407,PRK10266,PRK10767,PRK14276,PRK14277,PRK14278,PRK14279,PRK14280,PRK14281,PRK14282,PRK14283,PRK14284,PRK14285,PRK14286,PRK14287,PRK14288,PRK14289,PRK14290,PRK14291,PRK14292,PRK14293,PRK14294,PRK14295,PRK14296,PRK14297,PRK14298,PRK14299,PRK14300,PRK14301,PTZ00037,TIGR02349,TIGR02917,TIGR03835,cd00189,cd06257,smart00271
BC1G_11356	Y	-	M	115	30	85	2	6	1	15--37	-	plas=7	-	-	0	-	-	-
BC1G_11384	Y	-	M	316	23	293	4	19	0	--	2	extr=8	-	-	0	pfam01328	-	-
BC1G_11396	Y	-	M	47	24	23	2	1	0	--	-	extr=11	-	-	0	-	-	-
BC1G_11403	Y	-	M	114	19	95	9	2	0	--	2	extr=27	-	-	1	-	-	-
BC1G_11407	Y	-	M	429	24	405	1	8	0	--	2	extr=25	-	-	1	pfam00704	KOG2806	COG3325,cd00598,cd02872,cd02874,cd02878,cd02879,cd06545,cd06548,smart00636
BC1G_11422	Y	-	M	130	29	101	2	13	1	10--32	2	plas=8	-	-	0	-	-	-
BC1G_11423	Y	-	M	125	21	104	7	3	0	--	-	cyto=9	-	-	1	-	-	-
BC1G_11430	Y	-	M	119	36	83	0	10	1	10--32	-	plas=12	-	-	1	-	-	-
BC1G_11431	Y	-	M	106	24	82	3	4	0	--	2	mito=22	-	-	0	-	-	-
BC1G_11439	Y	-	M	641	21	620	6	22	0	--	3	extr=27	-	-	0	pfam00933,pfam01915,pfam14310	-	COG1472,PRK15098
BC1G_11481	Y	-	M	54	35	19	1	0	1	15--37	-	extr=17	-	-	0	-	-	-
BC1G_11493	Y	-	M	546	20	526	6	23	0	--	2	extr=12	-	-	1	pfam06824	-	COG3538
BC1G_11503	Y	-	M	100	20	80	6	1	0	--	-	extr=22	-	-	0	-	-	-
BC1G_11551	Y	-	M	168	22	146	6	8	0	--	2	extr=9	-	-	1	-	-	-
BC1G_11556	Y	-	M	663	25	638	7	15	0	--	4	extr=19	-	-	1	pfam01565,pfam08031	-	COG0277
BC1G_11571	Y	-	M	428	23	405	6	16	1	12--31	3	extr=17	-	-	0	-	-	-
BC1G_11588	Y	-	M	157	20	137	4	1	1	7--29	2	extr=27	-	-	0	-	-	-
BC1G_11601	Y	-	M	54	23	31	1	4	1	7--25	-	extr=21	-	-	0	-	-	-
BC1G_11606	Y	-	M	158	21	137	2	0	0	--	2	extr=26	-	-	0	-	-	-
BC1G_11607	Y	-	M	31	20	11	0	1	1	7--29	-	plas=15	-	-	0	-	-	-
BC1G_11614	Y	-	M	639	17	622	19	27	0	--	3	extr=11	-	-	0	-	-	-
BC1G_11647	Y	-	M	300	18	282	1	9	0	--	2	mito=12	-	-	1	pfam07992	KOG1336,KOG1346,KOG2495	COG0446,COG0492,COG1249,COG1252,PRK04965,PRK06292,PRK09564,PTZ00318,TIGR03169,TIGR03385
BC1G_11690	Y	-	M	385	18	367	8	7	0	--	2	extr=24	-	-	0	pfam00544	-	COG3866,smart00656
BC1G_11698	Y	-	M	361	21	340	10	2	0	--	3	extr=26	-	-	0	pfam00445	KOG1642	cd00374,cd01061,cd01062
BC1G_11716	Y	-	M	551	24	527	11	34	1	12--31	3	E.R.=9	-	-	0	-	-	-
BC1G_11730	Y	-	M	167	25	142	0	15	1	10--29	-	extr=10	-	-	1	-	-	-
BC1G_11751	Y	-	M	452	18	434	8	12	0	--	2	extr=24	-	-	1	pfam00328	KOG1382	cd07040,cd07061
BC1G_11795	Y	-	M	280	17	263	4	4	0	--	2	extr=27	-	-	0	pfam11937	-	-
BC1G_11826	Y	-	M	412	25	387	14	11	0	--	3	extr=26	-	-	0	-	-	cd11618
BC1G_11835	Y	-	M	468	17	451	4	13	0	--	2	extr=25	-	-	1	pfam00328	KOG1382,KOG3720	cd07040,cd07061
BC1G_11855	-	Y	M	136	22	114	0	0	0	--	2	extr=22	-	-	1	-	-	-
BC1G_11861	Y	-	M	61	20	41	2	5	1	7--29	-	mito=13	-	-	0	-	-	-
BC1G_11868	Y	-	M	1184	30	1154	8	66	1	13--30	2	cyto=6.5	-	-	1	pfam00069,pfam06479,pfam07714	KOG0032,KOG0033,KOG0192,KOG0193,KOG0194,KOG0197,KOG0198,KOG0200,KOG0201,KOG0574,KOG0575,KOG0577,KOG0578,KOG0579,KOG0581,KOG0582,KOG0583,KOG0585,KOG0586,KOG0587,KOG0588,KOG0589,KOG0590,KOG0591,KOG0592,KOG0593,KOG0594,KOG0595,KOG0596,KOG0597,KOG0598,KOG0599,KOG0600,KOG0601,KOG0603,KOG0604,KOG0605,KOG0607,KOG0610,KOG0612,KOG0614,KOG0615,KOG0616,KOG0658,KOG0659,KOG0660,KOG0661,KOG0662,KOG0663,KOG0664…	COG0515,PLN00009,PLN00034,PRK13184,PTZ00024,PTZ00036,PTZ00266,TIGR03903,cd00180,cd00192,cd05034,cd05038,cd05039,cd05040,cd05044,cd05045,cd05047,cd05053,cd05057,cd05060,cd05066,cd05088,cd05089,cd05099,cd05101,cd05109,cd05110,cd05116,cd05118,cd05122,cd05123,cd05148,cd05570,cd05571,cd05572,cd05573,cd05574,cd05575,cd05577,cd05578,cd05579,cd05580,cd05581,cd05582,cd05583,cd05584,cd05585,cd05586,cd05589…
BC1G_11889	-	Y	M	343	17	326	4	0	0	--	4	extr=21	-	-	0	pfam10342	-	-
BC1G_11891	Y	-	M	166	20	146	1	2	0	--	2	extr=26	-	-	1	-	-	-
BC1G_11898	Y	-	M	294	19	275	5	7	0	--	3	extr=25	-	-	0	pfam00332	-	COG5309
BC1G_11907	Y	-	M	316	23	293	2	8	1	5--27	2	extr=17	-	-	1	pfam04389	KOG3946	cd02690,cd03880,cd08656
BC1G_11909	Y	-	M	412	20	392	12	4	0	--	4	extr=26	-	-	0	pfam00295	-	COG5434,PLN02155,PLN02188,PLN02218,PLN02793,PLN03003,PLN03010
BC1G_11915	Y	-	M	171	23	148	4	3	1	7--29	-	extr=25	-	-	1	-	-	-
BC1G_11941	Y	-	M	218	17	201	5	6	0	--	-	extr=21	-	-	1	-	-	-
BC1G_11947	Y	-	M	212	18	194	0	6	0	--	9	extr=16	-	-	0	-	-	-
BC1G_11950	-	Y	M	230	18	212	3	0	0	--	3	extr=25	-	-	0	-	-	-
BC1G_11961	Y	-	M	110	16	94	1	5	0	--	-	nucl=17	-	-	0	-	-	-
BC1G_11971	Y	-	M	988	19	969	10	53	0	--	2	plas=6	-	-	1	pfam00072,pfam02518,pfam08448	KOG0519	CHL00148,COG0642,COG0745,COG0784,COG2197,COG2204,COG2205,COG3437,COG3706,COG3852,COG4251,COG5000,COG5002,PRK09581,PRK09959,PRK10529,PRK10643,PRK10710,PRK10766,PRK10841,PRK11091,PRK11107,PRK11360,PRK11361,PRK11466,PRK13837,PRK15347,TIGR01387,TIGR02154,TIGR02956,TIGR02966,cd00075,cd00156,smart00387
BC1G_11977	Y	-	M	319	23	296	1	23	0	--	-	nucl=9	-	-	0	pfam04991	-	-
BC1G_11994	Y	-	M	552	19	533	6	44	0	--	2	nucl=16	-	-	1	pfam01494	KOG2614,KOG3855	COG0644,COG0654,PRK05714,PRK06126,PRK06183,PRK06184,PRK06185,PRK06834,PRK07045,PRK07190,PRK07333,PRK07364,PRK07608,PRK08013,PRK08132,PRK08243,PRK08244,PRK08294,PRK08773,PRK08850,TIGR01984,TIGR01988,TIGR01989,TIGR02360
BC1G_12003	Y	-	M	147	20	127	6	2	0	--	2	extr=21	-	-	0	-	-	-
BC1G_12006	Y	-	M	653	22	631	4	23	1	12--31	3	extr=19	-	-	0	pfam00135,pfam07859	KOG1515,KOG1516,KOG4389	COG0657,COG2272,cd00312
BC1G_12017	Y	-	M	392	19	373	6	7	1	7--24	3	extr=27	-	-	0	pfam00544	-	COG3866,smart00656
BC1G_12021	Y	-	M	542	20	522	8	21	1	5--24	2	extr=25	-	-	0	pfam00135	KOG1515,KOG1516,KOG4389	COG0657,COG2272,cd00312
BC1G_12058	Y	-	M	521	28	493	4	32	0	--	2	cyto=8	-	-	0	pfam00067	KOG0156,KOG0157,KOG0158,KOG0159,KOG0684	PLN02290
BC1G_12064	-	Y	M	180	23	157	9	3	0	--	2	extr=24	-	-	1	pfam01822	KOG4157	smart00321
BC1G_12100	Y	-	M	95	27	68	2	2	0	--	-	mito=9	-	-	0	-	-	-
BC1G_12117	Y	-	M	588	26	562	5	19	0	--	2	extr=26	-	-	2	pfam00732,pfam05199	KOG1238	COG2303,PLN02785,PRK02106,TIGR01810,TIGR03970
BC1G_12131	Y	-	M	251	22	229	0	5	0	--	2	extr=25	-	-	0	pfam03636	-	COG1554
BC1G_12132	Y	-	M	1003	22	981	5	22	0	--	3	extr=25	-	-	0	pfam03632,pfam03636	KOG4125	COG1554,PRK13807
BC1G_12138	Y	-	M	581	23	558	2	10	0	--	2	extr=27	-	-	0	pfam06964	-	COG3534,smart00813
BC1G_12139	Y	-	M	548	25	523	4	18	0	--	3	extr=27	-	-	1	pfam00135	KOG1516,KOG4389	COG2272,cd00312
BC1G_12142	Y	-	M	117	26	91	5	4	1	7--26	-	extr=25	-	-	0	pfam01822	-	-
BC1G_12145	Y	-	M	636	18	618	5	15	0	--	4	extr=26	-	-	0	pfam00754,pfam09118	KOG4441	cd00057,cd02851
BC1G_12157	Y	-	M	398	19	379	3	17	0	--	2	extr=22	-	-	0	pfam00491	KOG2964,KOG2965	COG0010,PLN02615,PRK01722,PRK02190,PRK13773,TIGR01227,TIGR01229,TIGR01230
BC1G_12165	Y	-	M	105	35	70	2	3	1	13--35	-	extr=9	-	-	0	-	-	-
BC1G_12169	Y	-	M	137	18	119	6	3	0	--	2	extr=23	-	-	0	-	-	-
BC1G_12171	Y	-	M	362	22	340	6	6	0	--	4	extr=26	-	-	0	-	-	-
BC1G_12174	Y	-	M	504	18	486	3	10	0	--	2	extr=24	-	-	0	pfam05426	-	-
BC1G_12177	Y	-	M	295	34	261	5	13	0	--	2	mito=9	-	-	1	pfam00067	KOG0156,KOG0157,KOG0158,KOG0159	-
BC1G_12184	-	Y	M	414	20	394	15	11	0	--	3	extr=26	-	-	0	pfam00314	-	cd08961,cd09215,cd09217,cd09218,cd09219,smart00205
BC1G_12185	Y	-	M	87	22	65	8	3	1	4--26	-	extr=24	-	-	0	-	-	-
BC1G_12188	Y	-	M	198	23	175	1	13	1	5--24	2	mito=10	-	-	1	-	-	cd07822
BC1G_12200	Y	-	M	383	18	365	1	12	0	--	2	cyto=20	-	-	1	pfam01546,pfam07687	KOG2275	COG0624,COG1473,PRK00466,PRK04443,PRK05111,PRK06133,PRK06837,PRK06915,PRK07338,PRK07522,PRK08588,PRK08651,PRK08652,PRK08737,PRK13004,PRK13007,PRK13009,PRK13013,PRK13983,TIGR01246,TIGR01880,TIGR01883,TIGR01891,TIGR01892,TIGR01900,TIGR01902,TIGR01910,TIGR03526,cd02697,cd03873,cd03885,cd03886,cd03891,cd03894,cd03895,cd03896,cd05646,cd05647,cd05649,cd05650,cd05651,cd05652,cd05653,cd05674,cd05675,cd05…
BC1G_12229	Y	-	M	1156	24	1132	7	12	0	--	8	extr=26	-	-	0	-	-	-
BC1G_12247	Y	-	M	593	23	570	0	46	1	7--29	5	extr=20	-	-	0	-	-	-
BC1G_12249	Y	-	M	518	25	493	3	12	0	--	4	extr=26	-	-	1	pfam00135	KOG1516,KOG4389	COG2272,cd00312
BC1G_12251	Y	-	M	171	28	143	4	4	1	12--34	2	extr=27	-	-	1	-	-	-
BC1G_12270	Y	-	M	1021	15	1006	16	48	0	--	6	nucl=15.5	-	-	1	pfam12511	-	-
BC1G_12271	Y	-	M	440	24	416	3	21	0	--	2	mito=12	-	-	1	pfam01019	KOG2410	COG0405,PLN02180,PLN02198,PRK09615,TIGR00066
BC1G_12279	-	Y	M	329	18	311	8	2	0	--	3	extr=25	-	-	0	pfam05730	-	smart00747
BC1G_12292	Y	-	M	536	17	519	6	4	0	--	6	extr=22	-	-	0	-	-	-
BC1G_12303	-	Y	M	256	20	236	8	4	0	--	3	extr=26	-	-	0	-	-	-
BC1G_12320	-	Y	M	261	19	242	8	4	0	--	2	extr=22	-	-	0	-	-	-
BC1G_12330	-	Y	M	514	19	495	12	20	1	491--513	4	extr=24	-	-	0	-	-	-
BC1G_12343	Y	-	M	932	16	916	5	23	0	--	3	extr=27	-	-	0	pfam00082,pfam06280	-	PTZ00262,TIGR03921,cd00306,cd04077,cd04842,cd04848,cd04852,cd05561,cd05562,cd07473,cd07474,cd07475,cd07477,cd07478,cd07480,cd07481,cd07482,cd07483,cd07484,cd07485,cd07487,cd07489,cd07490,cd07496,cd07498
BC1G_12349	Y	-	M	68	16	52	1	1	0	--	-	E.R.=8	-	-	0	-	-	-
BC1G_12369	Y	-	M	111	36	75	0	6	1	20--41	-	extr=10	-	62--78	0	-	-	-
BC1G_12374	Y	-	M	187	17	170	4	4	0	--	2	extr=26	-	-	0	-	-	-
BC1G_12379	Y	-	M	297	20	277	14	5	0	--	2	extr=25	-	-	0	pfam01083	-	-
BC1G_12385	Y	-	M	310	39	271	3	16	1	12--34	2	cyto=8.5	-	-	1	pfam01553	KOG1505,KOG2848	COG0204,PLN02380,PLN02510,PRK14014,TIGR00530,cd07989,cd07990,smart00563
BC1G_12449	Y	-	M	433	19	414	5	14	0	--	2	extr=26	-	-	0	pfam01328	-	-
BC1G_12450	Y	-	M	389	18	371	0	9	0	--	4	extr=27	-	-	0	-	-	-
BC1G_12455	Y	-	M	351	16	335	11	6	0	--	3	extr=26	-	-	0	-	-	-
BC1G_12465	Y	-	M	65	22	43	1	4	0	--	-	mito=22	-	-	0	-	-	-
BC1G_12478	Y	-	M	415	18	397	5	8	0	--	3	extr=25	-	-	0	pfam00150	-	COG2730
BC1G_12517	Y	-	M	384	20	364	6	6	0	--	2	extr=26	-	-	0	pfam00544	-	COG3866,smart00656
BC1G_12522	Y	-	M	692	21	671	14	13	0	--	2	extr=26	-	-	0	-	KOG3770	cd00842
BC1G_12525	Y	-	M	427	19	408	3	10	0	--	2	extr=27	-	-	1	pfam01328	-	-
BC1G_12529	Y	-	M	124	18	106	2	2	0	--	-	extr=21	-	-	1	-	-	-
BC1G_12537	Y	-	M	507	21	486	5	9	0	--	2	extr=25	-	-	0	pfam01565	-	COG0277
BC1G_12543	Y	-	M	1035	32	1003	2	44	1	12--34	3	E.R.=8	-	949--963	1	pfam00012	KOG0100,KOG0101,KOG0102,KOG0103,KOG0104	CHL00094,COG0443,PLN03184,PRK00290,PRK01433,PRK05183,PRK13410,PRK13411,PTZ00009,PTZ00186,PTZ00400,TIGR01991,TIGR02350
BC1G_12545	Y	-	M	518	26	492	6	30	1	12--34	2	cyto=8	-	-	2	pfam00067	KOG0156,KOG0157,KOG0158,KOG0159,KOG0684	COG2124,PLN00110,PLN00168,PLN02183,PLN02196,PLN02290,PLN02302,PLN02394,PLN02426,PLN02500,PLN02655,PLN02687,PLN02738,PLN02774,PLN02936,PLN02966,PLN02971,PLN02987,PLN03018,PLN03112,PLN03141,PLN03234,PTZ00404
BC1G_12573	Y	-	M	48	33	15	0	1	1	15--37	2	mito=13	-	-	0	-	-	-
BC1G_12610	Y	-	M	140	20	120	1	12	0	--	-	nucl=16.5	-	-	1	-	-	-
BC1G_12619	Y	-	M	314	20	294	6	4	0	--	2	extr=26	-	-	0	pfam11327	-	-
BC1G_12627	Y	-	M	471	19	452	11	5	0	--	3	extr=26	-	-	0	pfam03856	-	-
BC1G_12639	Y	-	M	372	21	351	5	12	0	--	-	extr=17	-	-	0	-	-	-
BC1G_12680	Y	-	M	229	17	212	3	4	0	--	2	extr=27	-	-	0	-	-	cd01837,cd01846
BC1G_12699	Y	-	M	113	22	91	0	2	0	--	3	nucl=8.5	-	-	0	-	-	-
BC1G_12722	Y	-	M	164	21	143	3	9	0	--	3	mito=13	-	-	0	-	-	-
BC1G_12725	Y	-	M	172	16	156	0	1	0	--	2	extr=18	-	-	0	pfam12296	-	-
BC1G_12732	Y	-	M	143	22	121	3	11	0	--	-	extr=18	-	-	0	-	-	-
BC1G_12743	Y	-	M	111	25	86	3	9	1	5--27	-	mito=9	-	-	0	-	-	-
BC1G_12747	Y	-	M	106	20	86	8	1	0	--	2	extr=25	-	-	1	-	-	-
BC1G_12751	Y	-	M	313	24	289	8	6	1	12--34	2	extr=24	-	-	0	pfam07519	-	-
BC1G_12753	Y	-	M	185	19	166	8	8	0	--	2	extr=24	-	-	0	-	-	-
BC1G_12766	Y	-	M	178	21	157	2	2	0	--	2	extr=27	-	-	0	-	-	-
BC1G_12776	Y	-	M	615	19	596	6	16	0	--	3	extr=26	-	-	0	pfam09286	-	COG4934,cd04056,cd11377,smart00944
BC1G_12793	Y	-	M	903	17	886	21	15	0	--	8	extr=27	-	-	0	-	-	-
BC1G_12831	-	Y	M	226	19	207	4	2	1	203--225	2	extr=13	-	-	0	-	-	-
BC1G_12838	Y	-	M	376	29	347	4	18	1	9--26	3	mito=14	-	-	0	-	-	cd06532
BC1G_12859	Y	-	M	997	22	975	8	25	0	--	3	extr=27	-	-	0	pfam01055	KOG1065,KOG1066	COG1501,PLN02763,PRK10426,PRK10658,cd06589,cd06591,cd06593,cd06596,cd06598,cd06599,cd06600,cd06601,cd06602,cd06603,cd06604
BC1G_12867	Y	-	M	187	18	169	3	4	0	--	2	extr=27	-	-	1	-	-	-
BC1G_12886	Y	-	M	101	43	58	1	7	1	22--44	-	mito=8	-	-	0	-	-	-
BC1G_12892	Y	-	M	202	32	170	7	5	1	13--30	2	extr=24	-	-	0	-	-	-
BC1G_12914	Y	-	M	539	20	519	10	12	0	--	3	extr=26	-	-	0	pfam01735	KOG1325	cd00147,cd07200,cd07203,smart00022
BC1G_12927	Y	-	M	227	17	210	4	3	0	--	4	extr=26	-	-	0	-	-	-
BC1G_12931	Y	-	M	181	20	161	2	6	0	--	3	extr=21	-	-	0	-	-	-
BC1G_12932	Y	-	M	585	17	568	10	15	0	--	2	extr=26	-	-	0	pfam07519	-	-
BC1G_12949	Y	-	M	45	20	25	0	3	0	--	-	extr=8	-	-	0	-	-	-
BC1G_12959	Y	-	M	342	19	323	10	9	0	--	2	cyto=10	-	-	0	-	-	-
BC1G_13004	Y	-	M	114	21	93	0	4	1	7--29	-	extr=8	-	-	0	-	-	-
BC1G_13007	Y	-	M	213	17	196	4	3	0	--	-	extr=15	-	-	0	-	-	-
BC1G_13010	Y	-	M	1041	21	1020	3	78	1	7--29	4	nucl=13	-	1005--1019	0	pfam00041,pfam01576,pfam01920,pfam02463,pfam02841,pfam04156	KOG0161,KOG0250,KOG0612,KOG0804,KOG0933,KOG0979,KOG0996,KOG4674	COG1196,COG1579,PRK03918,PTZ00121,TIGR02168,TIGR02169
BC1G_13024	Y	-	M	453	28	425	5	27	1	7--29	2	extr=10	-	-	0	pfam00291	KOG1250,KOG1251,KOG1252,KOG1481	COG0031,COG0498,COG1171,PLN00011,PLN02356,PLN02556,PLN02565,PLN03013,PRK06381,PRK08526,PRK10717,PRK11761,TIGR01127,TIGR01136,TIGR01137,TIGR01138,TIGR01139,TIGR03945,cd00640,cd01561,cd01562,cd01563
BC1G_13076	Y	-	M	267	33	234	1	29	1	7--26	4	mito=6	-	-	0	-	-	-
BC1G_13085	Y	-	M	249	18	231	0	25	0	--	9	nucl=14	-	-	0	-	-	-
BC1G_13111	Y	-	M	314	16	298	4	17	0	--	2	extr=12	-	-	0	-	-	-
BC1G_13118	Y	-	M	507	23	484	6	9	0	--	2	extr=9	-	-	0	pfam00085,pfam13848	KOG0190,KOG0191,KOG0907,KOG0910,KOG0912,KOG1731,KOG4277	COG0526,COG3118,PLN02309,PRK09381,PRK10996,PTZ00051,PTZ00102,PTZ00443,TIGR01068,TIGR01126,TIGR01130,cd01659,cd02947,cd02956,cd02961,cd02992,cd02993,cd02994,cd02995,cd02996,cd02997,cd02998,cd03000,cd03001,cd03002,cd03003,cd03004,cd03005
BC1G_13123	Y	-	M	272	18	254	0	4	0	--	2	extr=27	-	-	0	pfam00657,pfam13472	KOG3035	COG2755,cd00229,cd01821
BC1G_13127	Y	-	M	57	28	29	1	3	1	11--33	-	plas=12	-	-	0	-	-	-
BC1G_13137	Y	-	M	457	19	438	9	12	0	--	3	extr=21	-	-	0	pfam00295	-	COG5434,PLN02155,PLN02188,PLN02218,PLN02793,PLN03003,PLN03010
BC1G_13139	Y	-	M	322	17	305	5	2	0	--	2	extr=25	-	-	0	pfam03443	-	-
BC1G_13150	Y	-	M	46	23	23	1	2	0	--	-	cysk=8	-	-	0	-	-	-
BC1G_13153	Y	-	M	1167	27	1140	4	35	0	--	3	extr=27	-	-	2	-	-	-
BC1G_13158	Y	-	M	325	18	307	3	10	0	--	2	extr=19	-	-	0	-	-	-
BC1G_13172	Y	-	M	64	19	45	1	4	0	--	-	mito=17	-	-	0	-	-	-
BC1G_13175	Y	-	M	71	25	46	3	2	0	--	-	mito=22	-	-	0	-	-	-
BC1G_13181	Y	-	M	46	24	22	0	2	1	10--32	-	mito=7	-	-	0	-	-	-
BC1G_13190	Y	-	M	128	20	108	8	7	0	--	-	extr=12	-	-	0	-	-	-
BC1G_13196	Y	-	M	616	38	578	6	27	1	21--40	2	mito=10	-	-	0	-	-	-
BC1G_13232	Y	-	M	109	25	84	9	7	0	--	-	mito=17	-	-	0	-	-	-
BC1G_13289	Y	-	M	204	19	185	8	3	0	--	2	extr=25	-	-	0	-	-	-
BC1G_13293	Y	-	M	89	25	64	0	3	1	10--27	-	extr=10	-	-	0	-	-	-
BC1G_13308	Y	-	M	211	28	183	4	16	1	2--19	2	extr=14	-	-	0	pfam11807	-	-
BC1G_13309	Y	-	M	46	18	28	0	2	0	--	-	mito=7	-	-	0	-	-	-
BC1G_13335	Y	-	M	377	19	358	40	9	0	--	10	extr=17	-	-	0	-	-	-
BC1G_13361	Y	-	M	277	17	260	2	13	0	--	2	mito=12	-	-	0	pfam00106,pfam13561	KOG0725,KOG1199,KOG1200,KOG1201,KOG1205,KOG1207,KOG1208,KOG1209,KOG1210,KOG1611,KOG4169	COG0300,COG0623,COG1028,COG4221,PLN02253,PRK05557,PRK05565,PRK05650,PRK05653,PRK05717,PRK05855,PRK05867,PRK05872,PRK05875,PRK06057,PRK06077,PRK06113,PRK06114,PRK06123,PRK06124,PRK06125,PRK06128,PRK06138,PRK06171,PRK06172,PRK06179,PRK06180,PRK06181,PRK06198,PRK06200,PRK06398,PRK06463,PRK06484,PRK06500,PRK06523,PRK06550,PRK06701,PRK06841,PRK06914,PRK06935,PRK06940,PRK06947,PRK06949,PRK07035,PRK0706…
BC1G_13367	Y	-	M	167	19	148	2	3	0	--	-	extr=23	-	-	0	pfam00295	-	-
BC1G_13386	Y	-	M	625	35	590	3	18	0	--	4	extr=25	-	-	0	pfam00732,pfam05199	KOG1238	COG2303,PLN02785,PRK02106,TIGR01810,TIGR03970
BC1G_13445	Y	-	M	641	18	623	6	10	0	--	5	extr=24	-	-	0	-	-	-
BC1G_13488	Y	-	M	315	23	292	8	3	1	7--29	2	extr=27	-	-	1	pfam00722	-	cd02181,cd02182,cd08023
BC1G_13513	Y	-	M	110	43	67	0	6	1	20--53	-	mito=9	-	-	1	-	-	-
BC1G_13543	Y	-	M	361	20	341	2	12	0	--	-	extr=25	-	-	0	-	-	-
BC1G_13563	Y	-	M	424	27	397	4	28	0	--	2	plas=7	-	-	0	pfam00067	KOG0156,KOG0157,KOG0158,KOG0159,KOG0684	COG2124,PLN00110,PTZ00404
BC1G_13581	Y	-	M	285	19	266	5	11	0	--	2	extr=12	-	-	0	pfam11327	-	-
BC1G_13585	Y	-	M	413	24	389	4	23	1	7--29	2	plas=6	-	-	1	-	-	-
BC1G_13645	Y	-	M	222	19	203	0	7	0	--	2	extr=23	-	-	0	pfam00457	-	-
BC1G_13655	Y	-	M	61	24	37	1	2	0	--	-	mito=17.5	-	-	1	-	-	-
BC1G_13659	Y	-	M	1132	22	1110	47	16	0	--	4	extr=25	-	-	1	pfam03659	-	cd11573,cd11575,cd11577
BC1G_13661	Y	-	M	395	32	363	4	13	1	7--29	2	extr=26	-	-	1	-	-	-
BC1G_13666	Y	-	M	76	31	45	3	2	1	10--32	-	cyto=15	-	-	1	-	-	-
BC1G_13681	Y	-	M	139	24	115	1	7	0	--	2	cyto=13	-	-	1	-	-	-
BC1G_13709	Y	-	M	67	16	51	0	1	1	2--21	-	extr=25	-	-	0	-	-	-
BC1G_13714	Y	-	M	423	16	407	8	16	0	--	2	extr=26	-	-	0	pfam00135	KOG1515,KOG1516,KOG4389	COG0657,COG2272,cd00312
BC1G_13728	Y	-	M	134	26	108	4	9	0	--	-	extr=10	-	-	0	-	-	-
BC1G_13750	Y	-	M	394	27	367	8	21	1	7--26	2	extr=10	-	-	0	pfam01793	KOG4472	COG5020
BC1G_13779	-	Y	M	95	21	74	0	1	0	--	2	extr=24	-	-	0	-	-	-
BC1G_13782	Y	-	M	128	22	106	5	11	0	--	-	extr=13	-	-	0	-	-	-
BC1G_13814	Y	-	M	54	22	32	0	2	0	--	-	extr=14	-	-	0	-	-	-
BC1G_13815	Y	-	M	579	31	548	10	14	0	--	3	extr=26	-	-	0	pfam07519	-	-
BC1G_13846	Y	-	M	51	21	30	0	0	0	--	-	extr=21	-	-	0	-	-	-
BC1G_13847	Y	-	M	331	22	309	8	3	1	7--29	3	extr=26	-	-	0	pfam00722	-	cd02181,cd02182,cd08023
BC1G_13855	Y	-	M	463	17	446	6	6	0	--	3	extr=26	-	-	1	-	-	COG2730
BC1G_13857	Y	-	M	204	25	179	0	10	1	4--26	-	plas=12	-	-	1	-	KOG0157,KOG0158	-
BC1G_13862	Y	-	M	355	20	335	15	3	0	--	3	extr=26	-	-	0	pfam02015	-	-
BC1G_13879	Y	-	M	84	16	68	8	4	0	--	-	extr=22	-	-	0	-	-	-
BC1G_13881	Y	-	M	357	19	338	1	13	0	--	2	extr=25	-	-	0	-	-	-
BC1G_13903	Y	-	M	585	20	565	8	22	0	--	2	extr=23	-	-	0	pfam00884	KOG3731,KOG3867	COG1368,COG3083,COG3119,PRK13759
BC1G_13910	-	Y	M	608	19	589	8	6	0	--	4	extr=24	-	-	0	-	-	-
BC1G_13913	Y	-	M	126	32	94	0	11	1	13--35	2	mito=11	-	-	0	-	-	-
BC1G_13936	Y	-	M	617	18	599	27	28	0	--	2	nucl=21.5	-	-	1	pfam01485	KOG0006,KOG1812,KOG1814,KOG1815	smart00647
BC1G_13938	Y	-	M	384	18	366	0	9	0	--	5	extr=26	-	-	0	-	-	-
BC1G_13947	Y	-	M	130	34	96	0	6	1	20--42	-	extr=19	-	-	1	-	-	-
BC1G_13960	Y	-	M	567	19	548	5	14	0	--	2	extr=27	-	-	0	pfam00135,pfam07859	KOG1515,KOG1516,KOG4389	COG0657,COG2272,cd00312
BC1G_13970	Y	-	M	432	23	409	10	10	0	--	3	extr=26	-	-	0	pfam00295	-	COG5434,PLN02155,PLN02188,PLN02218,PLN02793,PLN03003,PLN03010
BC1G_13975	Y	-	M	227	19	208	8	5	0	--	2	extr=17	-	-	0	-	-	-
BC1G_14009	Y	-	M	256	18	238	4	7	0	--	2	extr=25	-	-	0	-	-	cd01821
BC1G_14012	Y	-	M	678	19	659	5	25	0	--	3	extr=24	-	-	0	pfam00732,pfam05199	KOG1238	COG2303,PLN02785,PRK02106,TIGR01810,TIGR03970
BC1G_14014	Y	-	M	280	19	261	0	4	0	--	3	extr=24	-	-	0	-	-	-
BC1G_14030	Y	-	M	540	25	515	14	10	0	--	4	extr=27	-	-	0	pfam03198,pfam07983	-	smart00768
BC1G_14101	Y	-	M	383	19	364	4	14	0	--	3	extr=26	-	-	0	pfam00246	KOG2650	cd00596,cd03859,cd03860,cd03870,cd03871,cd06226,cd06227,cd06228,cd06229,cd06246,cd06247,cd06248,cd06904,smart00631
BC1G_14129	Y	-	M	160	17	143	2	2	0	--	3	extr=27	-	-	0	-	-	-
BC1G_14136	Y	-	M	88	20	68	2	1	0	--	-	extr=24	-	-	1	-	-	-
BC1G_14143	Y	-	M	165	18	147	1	4	0	--	-	plas=11	-	-	0	-	-	-
BC1G_14145	Y	-	M	642	18	624	2	4	0	--	7	extr=15	-	-	1	-	-	-
BC1G_14153	Y	-	M	257	18	239	4	3	0	--	3	extr=25	-	-	0	pfam01828	-	-
BC1G_14154	Y	-	M	225	17	208	0	5	0	--	3	extr=24	-	-	1	-	-	-
BC1G_14164	Y	-	M	869	17	852	8	26	0	--	4	extr=24	-	-	1	pfam00933,pfam01915,pfam14310	-	COG1472,PLN03080,PRK15098
BC1G_14177	Y	-	M	526	22	504	7	16	0	--	2	extr=26	-	-	0	pfam08031	-	COG0277
BC1G_14180	Y	-	M	385	17	368	8	32	0	--	2	cyto=12.5	-	-	0	pfam09402	-	-
BC1G_14202	Y	-	M	68	14	54	1	11	0	--	2	cyto_nucl=10.5	-	45--59	0	-	-	-
BC1G_14244	Y	-	M	388	24	364	3	23	0	--	2	extr=12	-	-	1	pfam01650	KOG1348,KOG1349	COG5206
BC1G_14255	Y	-	M	1198	19	1179	50	12	1	7--29	9	extr=25	-	-	1	pfam03659	-	cd11573,cd11577
BC1G_14256	Y	-	M	167	29	138	1	5	1	7--29	2	extr=20	-	-	1	-	-	-
BC1G_14286	Y	-	M	63	21	42	1	2	1	4--26	-	mito=10.5	-	-	0	pfam01105	KOG1690	-
BC1G_14288	Y	-	M	332	23	309	8	21	0	--	2	mito=18.5	-	-	0	pfam00135,pfam07859	KOG1515,KOG1516,KOG4388	COG0657,COG2272,PRK10162,cd00312
BC1G_14299	Y	-	M	348	18	330	7	4	0	--	4	extr=24	-	-	0	-	-	-
BC1G_14311	Y	-	M	400	40	360	6	8	1	19--41	2	extr=25	-	-	0	-	-	-
BC1G_14317	Y	-	M	270	22	248	5	5	0	--	3	extr=26	-	-	0	pfam00445	KOG1642	cd00374,cd01061
BC1G_14330	Y	-	M	572	19	553	7	20	0	--	2	extr=26	-	-	0	pfam00732,pfam05199	KOG1238	COG2303,PRK02106,TIGR01790,TIGR01810,TIGR03970
BC1G_14348	Y	-	M	198	17	181	1	2	0	--	3	extr=26	-	-	0	-	-	-
BC1G_14349	Y	-	M	710	18	692	9	14	0	--	4	extr=25	-	-	1	pfam00394,pfam07731,pfam07732	KOG1263	COG2132,PLN00044,PLN02168,PLN02191,PLN02354,PLN02604,PLN02792,PLN02835,PLN02991,PRK10965,TIGR01480,TIGR03388,TIGR03389,TIGR03390
BC1G_14398	Y	-	M	331	17	314	7	14	0	--	2	extr=24	-	-	0	pfam01266	KOG3923	TIGR02352
BC1G_14415	Y	-	M	241	21	220	7	5	0	--	2	extr=24	-	-	1	pfam01083	-	-
BC1G_14418	Y	-	M	166	18	148	0	6	0	--	-	extr=20	-	-	0	-	-	-
BC1G_14433	Y	-	M	147	34	113	1	6	0	--	2	cyto=13	-	-	0	-	-	-
BC1G_14446	Y	-	M	442	29	413	4	22	1	7--26	2	golg=9	-	-	0	-	KOG2458	smart00672
BC1G_14448	Y	-	M	55	39	16	0	1	1	10--31	-	plas=13	-	-	1	-	-	-
BC1G_14469	Y	-	M	412	18	394	10	8	0	--	3	extr=25	-	-	0	-	-	-
BC1G_14481	Y	-	M	251	20	231	8	3	0	--	3	extr=26	-	-	0	-	-	-
BC1G_14501	Y	-	M	229	21	208	4	6	0	--	2	extr=25	-	-	0	-	-	-
BC1G_14535	Y	-	M	124	26	98	2	1	0	--	3	extr=23	-	-	0	-	-	-
BC1G_14544	Y	-	M	512	22	490	5	27	1	5--27	-	plas=8	-	-	0	pfam00067	KOG0156,KOG0157,KOG0158,KOG0159,KOG0684	COG2124,PLN00110,PLN00168,PLN02169,PLN02183,PLN02196,PLN02426,PLN02687,PLN02738,PLN02936,PLN02966,PLN03112,PLN03195,PLN03234,PTZ00404
BC1G_14570	Y	-	M	452	20	432	2	12	0	--	2	extr=23	-	-	0	pfam00388	KOG4306	cd00137,cd08557,cd08586,cd08587,cd08616,cd08619,cd08621
BC1G_14591	Y	-	M	462	18	444	8	8	0	--	3	extr=26	-	-	0	pfam00450	KOG1282,KOG1283	COG2939,PLN02209,PLN03016,PTZ00472
BC1G_14622	Y	-	M	328	20	308	12	19	0	--	-	extr=7	-	-	0	-	-	-
BC1G_14630	Y	-	M	112	31	81	2	10	1	7--29	-	plas=14	-	-	0	-	-	-
BC1G_14698	Y	-	M	574	20	554	8	6	0	--	5	extr=23	-	-	0	-	-	-
BC1G_14702	Y	-	M	599	18	581	23	5	0	--	6	extr=23	-	-	0	pfam00840	-	cd07999
BC1G_14711	Y	-	M	242	19	223	4	8	0	--	-	extr=26	-	-	0	pfam11327	-	-
BC1G_14714	Y	-	M	350	17	333	2	9	0	--	2	extr=22	-	-	0	pfam00710	KOG0503	COG0252,PRK04183,PRK09461,PRK11096,TIGR00519,TIGR00520,TIGR02153,cd00411,cd08962,cd08963,cd08964,smart00870
BC1G_14730	Y	-	M	61	21	40	0	5	0	--	-	mito=8.5	-	-	0	-	-	-
BC1G_14732	Y	-	M	68	24	44	0	2	0	--	-	cyto_nucl=11	-	-	1	-	-	-
BC1G_14733	Y	-	M	261	22	239	0	4	0	--	3	extr=26	-	-	0	-	-	-
BC1G_14761	Y	-	M	99	17	82	1	3	0	--	-	cyto=13.5	-	-	0	-	-	TIGR01315,cd07782
BC1G_14796	Y	-	M	319	31	288	7	22	1	7--29	4	plas=9	-	-	0	-	-	-
BC1G_14811	Y	-	M	475	18	457	8	17	0	--	2	extr=10	-	-	0	pfam00328	KOG1382	cd07061
BC1G_14820	Y	-	M	669	18	651	9	16	0	--	2	extr=16	-	-	0	pfam09286	-	COG4934,cd04056,cd11377,smart00944
BC1G_14856	Y	-	M	35	26	9	0	1	0	--	-	mito=13	-	-	0	-	-	-
BC1G_14876	Y	-	M	139	26	113	7	8	0	--	-	plas=11	-	-	1	-	-	-
BC1G_14897	Y	-	M	67	25	42	0	2	1	7--25	-	extr=16	-	-	1	-	-	-
BC1G_14898	Y	-	M	313	34	279	0	26	1	7--29	3	mito=8	-	-	1	-	-	-
BC1G_14929	Y	-	M	108	29	79	1	4	1	5--27	-	plas=7	-	-	1	-	-	-
BC1G_14935	Y	-	M	196	23	173	0	5	0	--	-	cyto=10.5	-	-	0	pfam04603	KOG3329	cd00224
BC1G_14944	Y	-	M	421	22	399	8	2	0	--	2	extr=26	-	-	0	pfam00704,pfam00734	KOG4701	cd02877,smart00236
BC1G_14950	Y	-	M	1052	22	1030	9	60	0	--	5	cyto=8.5	-	-	1	pfam00931,pfam13374,pfam13424	KOG1840,KOG4658	-
BC1G_14954	Y	-	M	134	21	113	4	3	0	--	2	extr=23	-	-	0	pfam03330	-	-
BC1G_14974	Y	-	M	515	21	494	5	12	0	--	4	extr=25	-	-	0	pfam00141	-	cd00314,cd00691,cd00692,cd08201
BC1G_14985	-	Y	M	209	23	186	6	1	1	186--208	-	extr=25	-	-	0	-	-	-
BC1G_14990	Y	-	M	670	26	644	4	26	0	--	3	extr=26	-	-	0	pfam00264	-	-
BC1G_14992	Y	-	M	183	21	162	3	9	0	--	-	mito=11	-	-	1	pfam00025,pfam00071,pfam08477,pfam09439	KOG0070,KOG0071,KOG0072,KOG0073,KOG0074,KOG0075,KOG0076,KOG0077,KOG0078,KOG0079,KOG0080,KOG0081,KOG0083,KOG0084,KOG0086,KOG0087,KOG0088,KOG0090,KOG0091,KOG0092,KOG0093,KOG0094,KOG0095,KOG0098,KOG0393,KOG0394,KOG0395,KOG1673,KOG4252,KOG4423	COG1100,COG2229,PLN00223,PLN03110,PTZ00133,TIGR00231,cd00154,cd00876,cd00878,cd00879,cd00882,cd01860,cd01861,cd01862,cd01863,cd01864,cd01865,cd01867,cd01868,cd01869,cd04105,cd04106,cd04107,cd04108,cd04109,cd04110,cd04111,cd04112,cd04113,cd04114,cd04115,cd04116,cd04118,cd04120,cd04123,cd04126,cd04127,cd04128,cd04132,cd04149,cd04150,cd04151,cd04152,cd04153,cd04154,cd04155,cd04156,cd04157,cd04158,cd…
BC1G_14994	Y	-	M	58	24	34	0	7	0	--	-	mito=6	-	-	0	-	-	-
BC1G_15017	Y	-	M	247	18	229	6	5	0	--	-	extr=21	-	-	0	pfam03443	-	-
BC1G_15025	Y	-	M	106	27	79	2	8	0	--	-	mito=17	-	-	0	-	-	-
BC1G_15038	Y	-	M	347	31	316	4	15	1	13--35	2	cyto=13	-	-	0	pfam00106,pfam08659	KOG0725,KOG1014,KOG1200,KOG1201,KOG1205,KOG1207,KOG1208,KOG1209,KOG1210,KOG1610	COG0300,COG1028,COG3967,COG4221,PLN02780,PRK05557,PRK05565,PRK05653,PRK05693,PRK05786,PRK05866,PRK05867,PRK05872,PRK05875,PRK05876,PRK06077,PRK06124,PRK06125,PRK06138,PRK06139,PRK06179,PRK06180,PRK06181,PRK06182,PRK06194,PRK06197,PRK06198,PRK06484,PRK06500,PRK06523,PRK06914,PRK06924,PRK06949,PRK07035,PRK07060,PRK07063,PRK07109,PRK07201,PRK07231,PRK07326,PRK07454,PRK07478,PRK07666,PRK07677,PRK0780…
BC1G_15041	Y	-	M	288	18	270	3	10	0	--	2	extr=24	-	-	0	pfam10282	-	COG2706
BC1G_15095	Y	-	M	142	17	125	0	2	0	--	2	extr=23	-	-	0	-	-	-
BC1G_15096	-	Y	M	135	34	101	0	2	0	--	2	extr=13	-	-	0	-	-	-
BC1G_15118	Y	-	M	400	19	381	8	9	0	--	2	extr=25	-	-	0	pfam00295	-	COG5434,PLN02155,PLN02218,PLN02793,PLN03003,PLN03010
BC1G_15130	Y	-	M	50	36	14	0	3	1	15--37	-	extr=10	-	-	0	-	-	-
BC1G_15150	Y	-	M	949	24	925	3	61	1	7--29	5	extr=9	-	-	1	pfam10296	KOG2238	-
BC1G_15159	Y	-	M	78	24	54	0	9	0	--	2	mito=15.5	-	-	0	-	-	-
BC1G_15167	Y	-	M	52	21	31	0	3	1	3--25	-	extr=9	-	-	0	-	-	-
BC1G_15173	Y	-	M	44	30	14	0	1	0	--	-	extr=9	-	-	0	-	-	-
BC1G_15201	-	Y	M	215	17	198	8	0	0	--	4	extr=19	-	-	0	pfam05730	-	-
BC1G_15213	Y	-	M	189	21	168	1	8	0	--	-	cyto=10.5	-	-	1	pfam00025,pfam00503,pfam09439	KOG0070,KOG0071,KOG0072,KOG0073,KOG0074,KOG0075,KOG0076,KOG0077,KOG0082,KOG0090	COG1100,COG2229,PLN00223,PTZ00133,TIGR00231,cd00878,cd00879,cd00882,cd04105,cd04149,cd04150,cd04151,cd04152,cd04153,cd04154,cd04155,cd04156,cd04157,cd04158,cd04159,cd04160,cd04161,cd04162,smart00177,smart00178
BC1G_15251	Y	-	M	54	23	31	2	2	0	--	-	mito=11	-	-	0	-	-	-
BC1G_15273	-	Y	M	111	18	93	8	1	0	--	2	extr=14	-	-	0	-	-	-
BC1G_15298	Y	-	M	333	22	311	1	14	0	--	2	nucl=8	-	-	1	-	-	-
BC1G_15333	Y	-	M	583	24	559	5	29	1	12--29	2	extr=10	-	-	2	pfam11051	-	-
BC1G_15341	Y	-	M	123	18	105	2	1	0	--	-	extr=24	-	-	0	-	-	cd01846
BC1G_15401	Y	-	M	406	29	377	8	24	0	--	2	extr=7	-	-	0	pfam11913	-	-
BC1G_15444	Y	-	M	81	26	55	0	1	1	13--35	-	plas=11	-	-	0	-	-	-
BC1G_15455	Y	-	M	340	22	318	1	22	0	--	3	cyto=8	-	-	0	pfam00069	-	cd08217,smart00220
BC1G_15511	Y	-	M	163	25	138	1	15	1	5--27	2	mito=9	-	119--133	0	-	-	-
BC1G_15518	Y	-	M	60	31	29	0	0	1	20--42	-	extr=20	-	-	1	-	-	-
BC1G_15520	Y	-	M	413	25	388	2	23	0	--	2	extr=17	-	-	1	pfam00491	KOG2964,KOG2965	COG0010,PLN02615,PRK01722,PRK02190,TIGR01227,TIGR01230
BC1G_15524	Y	-	M	375	17	358	22	10	0	--	6	extr=27	-	-	0	-	-	-
BC1G_15525	Y	-	M	219	20	199	7	12	0	--	2	extr=12	-	-	0	-	-	-
BC1G_15526	Y	-	M	518	21	497	2	27	1	5--24	3	cyto=9	-	-	0	pfam00067	KOG0156,KOG0157,KOG0158,KOG0159,KOG0684	-
BC1G_15542	Y	-	M	193	18	175	4	3	0	--	2	extr=26	-	-	0	-	-	-
BC1G_15580	Y	-	M	208	22	186	5	10	0	--	3	extr=13	-	-	1	-	-	-
BC1G_15611	Y	-	M	53	19	34	2	3	0	--	-	mito=13	-	-	0	-	-	-
BC1G_15641	Y	-	M	674	18	656	5	25	0	--	5	extr=25	-	-	0	pfam00930	-	COG0823,PRK00178,PRK01029,PRK01742,PRK02889,PRK03629,PRK04792,PRK04922,PRK05137,TIGR02800
BC1G_15643	Y	-	M	278	20	258	4	6	0	--	2	extr=24	-	-	0	pfam02265	-	cd10981,cd11010
BC1G_15646	Y	-	M	200	20	180	11	4	0	--	-	extr=19	-	-	1	-	-	-
BC1G_15663	Y	-	M	694	22	672	2	19	0	--	4	extr=25	-	-	1	pfam00326,pfam05448	KOG2100,KOG2281	COG1506
BC1G_15668	-	Y	M	195	18	177	12	3	1	177--194	3	extr=27	-	-	0	-	-	-
BC1G_15673	Y	-	M	89	18	71	2	7	0	--	-	mito=9	-	-	1	-	-	-
BC1G_15734	Y	-	M	133	18	115	1	8	1	4--23	-	extr=14	-	-	1	-	-	-
BC1G_15737	Y	-	M	48	15	33	2	0	0	--	-	plas=7	-	-	1	-	-	-
BC1G_15746	Y	-	M	373	28	345	4	19	1	7--29	2	extr=17	-	-	0	-	KOG4179	cd06532
BC1G_15748	Y	-	M	75	22	53	3	1	1	2--24	-	mito=6	-	-	0	-	-	-
BC1G_15755	Y	-	M	57	31	26	0	2	1	10--32	-	plas=12	-	-	0	-	-	-
BC1G_15759	Y	-	M	41	19	22	0	1	0	--	-	mito=18	-	-	1	-	-	-
BC1G_15766	Y	-	M	160	20	140	7	5	0	--	2	mito=11	-	-	1	-	-	-
BC1G_15784	Y	-	M	431	22	409	16	5	0	--	3	extr=26	-	-	0	pfam03856	-	-
BC1G_15799	Y	-	M	259	33	226	1	9	1	7--29	-	extr=19	-	-	0	pfam05637	KOG4748	-
BC1G_15808	Y	-	M	579	22	557	6	32	0	--	3	extr=10	-	-	1	pfam07969	-	COG1228,COG1574,PRK09356,cd01300,cd01309
BC1G_15825	Y	-	M	354	28	326	4	20	1	13--35	-	extr=10	-	-	3	pfam00067	KOG0156,KOG0157,KOG0158	COG2124
BC1G_15833	Y	-	M	396	20	376	4	18	1	5--27	-	plas=11	-	-	0	pfam00067	KOG0156,KOG0157,KOG0158,KOG0159,KOG0684	COG2124,PLN00110,PLN00168,PLN02183,PLN02196,PLN02290,PLN02302,PLN02394,PLN02655,PLN02687,PLN02738,PLN02774,PLN02936,PLN02966,PLN02987,PLN03018,PLN03112,PLN03195,PTZ00404
BC1G_15835	Y	-	M	30	19	11	0	1	0	--	-	extr=25	-	-	1	-	-	-
BC1G_15850	Y	-	M	42	27	15	0	0	1	15--37	-	extr=14	-	-	1	-	-	-
BC1G_15855	Y	-	M	145	20	125	7	14	0	--	-	extr=10	-	-	0	-	-	-
BC1G_15867	Y	-	M	82	22	60	0	4	1	4--23	-	extr=8	-	-	0	-	-	-
BC1G_15870	Y	-	M	78	19	59	1	5	0	--	-	extr=10	-	-	0	-	-	-
BC1G_15881	Y	-	M	401	33	368	5	25	1	13--32	2	cyto=8	-	-	1	pfam00067	KOG0156,KOG0157,KOG0158,KOG0159,KOG0684	COG2124,PLN02169,PLN02183,PLN02655,PLN02687,PLN02966,PLN03234
BC1G_15885	Y	-	M	40	19	21	1	5	1	5--24	-	mito=19	-	-	1	-	-	-
BC1G_15887	Y	-	M	492	16	476	10	1	0	--	8	extr=10	-	-	0	-	-	-
BC1G_15901	Y	-	M	198	21	177	0	19	1	5--27	-	extr=13	-	-	0	pfam02845	-	-
BC1G_15903	-	Y	M	246	20	226	4	0	0	--	2	extr=22	-	-	0	-	-	-
BC1G_15919	Y	-	M	506	23	483	7	30	0	--	-	extr=15	-	-	3	pfam00067	KOG0156,KOG0157,KOG0158,KOG0159	COG2124,PLN02290,PLN03195
BC1G_15957	Y	-	M	44	17	27	1	2	1	7--29	-	extr=19	-	-	0	-	-	-
BC1G_15977	Y	-	M	404	16	388	15	7	0	--	2	extr=24	-	-	0	-	-	-
BC1G_15988	Y	-	M	72	32	40	1	4	0	--	-	mito=10	-	-	0	-	-	-
BC1G_16006	Y	-	M	207	18	189	0	3	0	--	2	extr=26	-	-	0	pfam01161	KOG3346	cd00866
BC1G_16035	Y	-	M	100	18	82	0	4	1	7--29	3	extr=8	-	-	1	-	-	-
BC1G_16071	Y	-	M	153	19	134	4	1	1	7--29	-	extr=27	-	-	0	-	-	-
BC1G_16072	Y	-	M	56	21	35	0	3	1	5--24	-	extr=13	-	-	0	-	-	-
BC1G_16084	Y	-	M	506	34	472	2	26	1	13--35	2	cyto=7	-	-	1	pfam00067	KOG0156,KOG0157,KOG0158,KOG0159,KOG0684	COG2124,PLN00110,PLN00168,PLN02169,PLN02183,PLN02290,PLN02302,PLN02394,PLN02426,PLN02500,PLN02655,PLN02687,PLN02738,PLN02774,PLN02936,PLN02966,PLN02971,PLN02987,PLN03018,PLN03112,PLN03141,PLN03195,PLN03234,PTZ00404
BC1G_16088	Y	-	M	173	21	152	0	9	0	--	2	extr=16	-	-	0	-	-	-
BC1G_16100	Y	-	M	468	22	446	2	22	1	7--29	2	extr=18	-	-	2	pfam01494	KOG2614	COG0644,COG0654,PLN02927,PRK06183,PRK06475,PRK06753,PRK06847,PRK07538,PRK07588,PRK08013,PRK08163,TIGR01984,TIGR03219
BC1G_16107	Y	-	M	96	20	76	10	2	0	--	3	extr=24	-	-	0	-	-	-
BC1G_16127	Y	-	M	438	19	419	4	23	0	--	2	extr=25	-	-	0	pfam00135	KOG1516,KOG4389	COG2272,cd00312
BC1G_16129	Y	-	M	70	17	53	0	18	1	6--28	2	mito=10	-	-	0	-	-	-
BC1G_16147	Y	-	M	203	14	189	3	11	1	2--24	2	mito=14	-	-	1	pfam00067	KOG0156,KOG0157,KOG0158,KOG0159,KOG0684	COG2124,PLN00110,PLN00168,PLN02169,PLN02183,PLN02196,PLN02290,PLN02302,PLN02394,PLN02426,PLN02500,PLN02655,PLN02687,PLN02738,PLN02774,PLN02936,PLN02966,PLN02971,PLN02987,PLN03112,PLN03141,PLN03195,PLN03234,PTZ00404
BC1G_16207	Y	-	M	160	34	126	3	11	0	--	-	mito=14.5	-	-	0	-	-	-
BC1G_16209	-	Y	M	312	16	296	1	4	0	--	4	extr=26	-	-	0	pfam07745	-	COG3867
BC1G_16238	Y	-	M	313	17	296	3	5	0	--	2	extr=26	-	-	1	-	-	COG2730
BC1G_16267	Y	-	M	46	24	22	0	0	0	--	-	extr=11	-	-	0	-	-	-
BC1G_16273	Y	-	R	82	23	59	0	4	1	2--24	-	mito=15	-	-	0	-	-	-
BC1G_16275	Y	-	M	139	23	116	2	14	0	--	-	cysk=10	-	-	0	-	-	-
BC1G_16282	Y	-	M	224	21	203	3	12	0	--	2	extr=14	-	-	1	pfam01105	KOG1690,KOG1691,KOG1692,KOG1693,KOG3287	-
BC1G_16285	Y	-	M	106	28	78	2	4	0	--	-	mito=19.5	-	-	1	-	-	-
BC1G_16321	Y	-	N	62	23	39	2	1	0	--	-	mito=10	-	-	0	-	-	-
BC1G_16330	Y	-	M	290	18	272	6	13	0	--	3	cysk=22	-	-	0	pfam01073,pfam01370	KOG0747,KOG1371,KOG1430,KOG2774	COG0451,COG1087,PLN02260,TIGR01179,TIGR02197,cd05226,cd05228,cd05232,cd05234,cd05238,cd05240,cd05246,cd05247,cd05248,cd05256,cd05264,cd05272,cd08946
BC1G_16332	Y	-	M	170	21	149	8	10	1	7--26	2	plas=14	-	-	0	-	-	-
BC1G_16413	Y	-	M	79	21	58	1	0	0	--	-	extr=27	-	-	0	-	-	-
BC1G_16430	Y	-	A	311	19	292	1	24	1	7--29	2	extr=23	-	-	0	pfam08423	KOG1434,KOG1564	COG0468,PLN03186,PRK04301,PRK09361,PTZ00035,TIGR02236,TIGR02237,cd01123,cd01393
BC1G_16443	Y	-	M	215	21	194	0	7	1	4--26	2	cyto_nucl=10.666	-	-	0	-	-	-
BC1G_16446	Y	-	M	98	18	80	2	0	0	--	-	extr=14	-	-	0	-	-	cd05238

## Sheet: Table 2
Refined Secretome	secreted	gpi	aa1	prelen	siglen	maturelen	% C	numcs	numrs	TMs	TMpos	RADAR	WoLFPSORT	[HK]DEL	bipartite_NLS	NES	PFAM	KOG	CDD
BC1G_00003	Y	-	M	323	21	302	1.3245	4	8	0	--	2	extr=26	-	-	0	-	-	cd01837,cd01846
BC1G_00109	Y	-	M	283	18	265	0.377358	1	1	0	--	2	extr=26	-	-	1	pfam12138	-	-
BC1G_00198	Y	-	M	516	21	495	1.0101	5	19	0	--	3	extr=23	-	-	1	pfam06824	-	COG3538
BC1G_00226	Y	-	M	432	18	414	0.483092	2	9	0	--	2	extr=25	-	-	0	-	-	-
BC1G_00230	Y	-	M	380	19	361	1.66205	6	7	0	--	4	extr=27	-	-	0	pfam00295	-	COG5434,PLN02155,PLN02188,PLN02218,PLN03003,PLN03010
BC1G_00233	Y	-	M	589	21	568	2.28873	13	8	0	--	4	extr=23	-	-	2	-	-	-
BC1G_00240	Y	-	M	665	25	640	1.40625	9	16	0	--	2	extr=23	-	-	2	pfam00295,pfam04063	KOG2973	COG5434,PLN02155,PLN02188,PLN02218,PLN02793,PLN03003,PLN03010
BC1G_00245	Y	-	M	787	17	770	0.38961	3	29	0	--	7	extr=27	-	-	1	pfam07971	-	COG3537,TIGR01180
BC1G_00246	Y	-	M	181	19	162	1.85185	3	3	0	--	2	extr=19	-	-	0	-	-	-
BC1G_00279	Y	-	M	390	23	367	0.817439	3	12	0	--	2	extr=26	-	-	0	-	-	-
BC1G_00308	Y	-	M	327	18	309	2.26537	7	6	0	--	2	extr=24	-	-	0	pfam00657	-	cd01821
BC1G_00376	Y	-	M	521	19	502	0.59761	3	19	0	--	2	extr=27	-	-	0	pfam01735	KOG1325	cd00147,cd07200,cd07202,cd07203,smart00022
BC1G_00384	Y	-	M	506	17	489	1.02249	5	15	0	--	3	extr=24	-	-	0	pfam00450	KOG1282	COG2939,PTZ00472
BC1G_00409	Y	-	M	391	20	371	1.61725	6	4	0	--	2	extr=25	-	-	1	pfam00722	-	COG2273,PLN03161,cd00413,cd02175,cd02176,cd02183
BC1G_00448	Y	-	M	722	23	699	1.14449	8	20	0	--	3	extr=27	-	-	1	-	-	-
BC1G_00455	Y	-	M	530	20	510	0.392157	2	14	0	--	2	extr=25	-	-	0	pfam01532	KOG2204,KOG2429,KOG2430,KOG2431	PTZ00470
BC1G_00514	Y	-	M	182	19	163	2.45399	4	5	0	--	-	extr=25	-	-	0	-	-	-
BC1G_00529	Y	-	M	233	22	211	3.31754	7	5	0	--	-	extr=26	-	-	0	-	-	-
BC1G_00545	Y	-	M	441	18	423	0.945626	4	11	0	--	2	extr=27	-	-	1	pfam00026	KOG1339	cd05471,cd05474,cd05478
BC1G_00572	Y	-	M	275	22	253	1.18577	3	10	0	--	2	extr=25	-	-	0	-	-	-
BC1G_00576	Y	-	M	353	22	331	0.906344	3	5	0	--	2	extr=26	-	-	0	pfam00331	-	COG3693,smart00633
BC1G_00594	Y	-	M	248	18	230	0.869565	2	2	0	--	3	extr=26	-	-	0	pfam01670	-	PRK06215
BC1G_00617	Y	-	M	348	19	329	0.607903	2	10	0	--	3	extr=27	-	-	1	pfam01095	-	COG4677,PLN02170,PLN02176,PLN02197,PLN02201,PLN02217,PLN02301,PLN02304,PLN02313,PLN02314,PLN02416,PLN02432,PLN02468,PLN02480,PLN02484,PLN02488,PLN02497,PLN02506,PLN02634,PLN02665,PLN02671,PLN02682,PLN02698,PLN02708,PLN02713,PLN02745,PLN02773,PLN02916,PLN02933,PLN02990,PLN02995,PLN03043
BC1G_00639	Y	-	M	540	18	522	1.91571	10	9	0	--	3	extr=25	-	-	0	pfam07519	-	-
BC1G_00642	Y	-	M	424	18	406	1.23153	5	7	0	--	3	extr=27	-	-	0	pfam00150	-	COG2730
BC1G_00689	Y	-	M	677	18	659	2.12443	14	15	0	--	2	extr=26	-	-	0	-	KOG3770	cd00842
BC1G_00750	Y	-	M	516	19	497	1.00604	5	18	0	--	2	extr=27	-	-	0	pfam00135,pfam07859	KOG1515,KOG1516,KOG4389	COG0657,COG2272,cd00312
BC1G_00837	Y	-	M	179	27	152	1.31579	2	3	0	--	2	extr=19	-	-	0	-	-	-
BC1G_00878	Y	-	M	510	21	489	0.817996	4	13	0	--	3	extr=26	-	-	0	pfam01425	KOG1211,KOG1212	COG0154,PLN02722,PRK00012,PRK05962,PRK06061,PRK06102,PRK06707,PRK07056,PRK07139,PRK07235,PRK07487,PRK07488,PRK08137,PRK08186,PRK08310,PRK09201,PRK11910,TIGR00132,TIGR02713,TIGR02715
BC1G_00896	Y	-	M	155	20	135	2.96296	4	3	0	--	2	extr=23	-	-	0	-	-	-
BC1G_00912	Y	-	M	329	17	312	0.320513	1	8	0	--	2	extr=25	-	-	0	pfam00544	-	COG3866,smart00656
BC1G_00922	Y	-	M	145	19	126	3.1746	4	4	0	--	-	extr=24	-	-	0	pfam03443	-	-
BC1G_00958	Y	-	M	219	19	200	3.5	7	12	0	--	-	extr=18	-	-	1	-	-	-
BC1G_00960	Y	-	M	188	21	167	2.39521	4	6	0	--	-	extr=22	-	-	0	-	-	-
BC1G_00977	Y	-	M	173	16	157	0	0	1	0	--	2	extr=26	-	-	2	pfam12296	-	-
BC1G_00978	Y	-	M	587	19	568	1.05634	6	27	0	--	2	extr=22	-	-	0	pfam09286	-	COG4934,cd04056,cd11377,smart00944
BC1G_00991	Y	-	M	360	18	342	0.877193	3	11	0	--	2	extr=20	-	-	2	pfam00248	KOG1575,KOG1577	COG0656,COG0667,COG1453,COG4989,PRK10376,PRK11172,PRK11565,cd06660
BC1G_01000	Y	-	M	353	18	335	2.98507	10	10	0	--	2	extr=25	-	-	0	pfam00264	-	-
BC1G_01008	Y	-	M	398	22	376	1.06383	4	5	0	--	3	extr=25	-	-	0	pfam01670	-	-
BC1G_01012	Y	-	M	98	18	80	10	8	3	0	--	2	extr=20	-	-	0	pfam06766	-	-
BC1G_01015	Y	-	M	140	18	122	3.27869	4	4	0	--	2	extr=26	-	-	0	-	-	-
BC1G_01016	Y	-	M	202	19	183	2.18579	4	2	0	--	-	extr=25	-	-	0	-	-	-
BC1G_01026	Y	-	M	595	20	575	1.04348	6	7	0	--	3	extr=26	-	-	1	pfam09286	-	COG4934,cd04056,cd11377,smart00944
BC1G_01031	Y	-	M	360	18	342	0.584795	2	8	0	--	2	extr=26	-	-	0	pfam03022	-	-
BC1G_01033	Y	-	M	812	24	788	1.26904	10	22	0	--	2	extr=26	-	-	1	pfam12708	-	-
BC1G_01059	Y	-	M	254	18	236	8.47458	20	5	0	--	-	extr=25	-	-	0	-	-	-
BC1G_01064	Y	-	M	869	19	850	1.29412	11	10	0	--	4	extr=23	-	-	1	-	-	-
BC1G_01073	Y	-	M	724	18	706	1.41643	10	35	0	--	3	extr=22	-	-	0	pfam09286	-	COG4934,cd04056,cd11377,smart00944
BC1G_01077	Y	-	M	48	15	33	0	0	0	0	--	-	extr=21	-	-	0	-	-	-
BC1G_01080	Y	-	M	244	19	225	0.444444	1	1	0	--	2	extr=18	-	-	3	pfam12138	-	-
BC1G_01152	Y	-	M	479	18	461	1.0846	5	8	0	--	4	extr=26	-	-	0	-	-	-
BC1G_01204	Y	-	M	816	16	800	4	32	20	0	--	4	extr=27	-	-	1	pfam00187,pfam07250,pfam09118	-	cd00035,cd02851,cd11618,smart00270
BC1G_01234	Y	-	M	376	20	356	1.40449	5	6	0	--	2	extr=25	-	-	0	pfam00295	-	COG5434,PLN02155,PLN02188,PLN02218,PLN02793,PLN03003,PLN03010
BC1G_01286	Y	-	M	245	20	225	0.888889	2	5	0	--	2	extr=26	-	-	0	pfam00450	KOG1282,KOG1283	COG2939,PLN02209,PLN03016,PTZ00472
BC1G_01367	Y	-	M	488	20	468	2.13675	10	13	0	--	3	extr=22	-	-	0	pfam12697	-	-
BC1G_01393	Y	-	M	188	18	170	0	0	5	0	--	2	extr=26	-	-	1	pfam13577	-	-
BC1G_01397	Y	-	M	228	16	212	0.943396	2	5	0	--	-	extr=24	-	-	1	pfam00026	KOG1339	PTZ00013,PTZ00165,cd05470,cd05471,cd05472,cd05474,cd05476,cd05477,cd05478,cd05485,cd05486,cd05487,cd05488,cd05490,cd06097,cd06098
BC1G_01444	Y	-	M	90	20	70	14.2857	10	2	0	--	2	extr=25	-	-	0	-	-	-
BC1G_01472	Y	-	M	325	20	305	1.31148	4	10	0	--	-	extr=22	-	-	1	-	-	-
BC1G_01612	Y	-	M	250	18	232	3.01724	7	7	0	--	2	extr=26	-	-	0	-	-	-
BC1G_01615	Y	-	M	586	19	567	1.76367	10	15	0	--	4	extr=26	-	-	1	pfam07519	-	-
BC1G_01617	Y	-	M	472	19	453	2.20751	10	11	0	--	2	extr=27	-	-	2	pfam00295	-	PLN02155,PLN02188,PLN02218,PLN02793,PLN03003,PLN03010
BC1G_01628	Y	-	M	442	19	423	0.945626	4	13	0	--	4	extr=20	-	-	1	pfam01328	-	-
BC1G_01630	Y	-	M	675	19	656	0.914634	6	22	0	--	2	extr=22	-	-	1	pfam00732,pfam05199	KOG1238	COG2303,PLN02785,PRK02106,TIGR01810,TIGR03970
BC1G_01674	Y	-	M	297	19	278	2.51799	7	1	0	--	3	extr=24	-	-	0	pfam03067	-	-
BC1G_01719	Y	-	M	823	16	807	0.991326	8	15	0	--	4	extr=26	-	-	0	pfam00732,pfam05199	KOG1238	COG2303,PRK02106,TIGR01810,TIGR03970,cd09630
BC1G_01778	Y	-	M	487	17	470	2.34043	11	4	0	--	3	extr=27	-	-	1	pfam00331,pfam00734	-	COG3693,smart00236,smart00633
BC1G_01789	Y	-	M	612	18	594	0.841751	5	21	0	--	2	extr=26	-	-	0	pfam00732,pfam05199	KOG1238	COG2303,PLN02785,PRK02106,TIGR01810,TIGR03970
BC1G_01794	Y	-	M	441	20	421	0.950119	4	8	0	--	3	extr=26	-	-	2	pfam00026	KOG1339	PTZ00165,cd05471,cd05472,cd05474,cd05476,cd05477,cd05478,cd05485,cd05486,cd05487,cd05488,cd05490,cd06097,cd06098
BC1G_01803	Y	-	M	649	17	632	1.42405	9	19	0	--	3	extr=23	-	-	0	pfam09286	-	COG4934,cd04056,cd11377,smart00944
BC1G_01872	Y	-	M	348	20	328	1.21951	4	2	0	--	3	extr=25	-	-	0	-	-	-
BC1G_01874	Y	-	M	496	21	475	1.89474	9	11	0	--	3	extr=22	-	-	0	pfam10287,pfam10290	-	-
BC1G_01886	Y	-	M	76	15	61	3.27869	2	2	0	--	-	extr=18	-	-	0	-	-	-
BC1G_01896	Y	-	M	336	20	316	5.06329	16	6	0	--	4	extr=23	-	-	1	-	-	-
BC1G_01923	Y	-	M	478	20	458	0.436681	2	14	0	--	3	extr=27	-	-	1	pfam00295	-	PLN02793
BC1G_02003	Y	-	M	375	22	353	1.983	7	4	0	--	2	extr=24	-	-	1	pfam00295	-	COG5434,PLN02155,PLN02218,PLN02793,PLN03003,PLN03010
BC1G_02011	Y	-	M	330	20	310	1.29032	4	3	0	--	2	extr=26	-	-	0	-	-	COG4124
BC1G_02012	Y	-	M	266	19	247	2.42915	6	5	0	--	3	extr=25	-	-	0	-	-	-
BC1G_02016	Y	-	M	523	19	504	0.793651	4	11	0	--	3	extr=24	-	-	0	pfam00135	KOG1516,KOG4389	COG0657,COG2272,cd00312
BC1G_02021	Y	-	M	628	22	606	0.660066	4	19	0	--	3	extr=25	-	-	0	pfam00732,pfam05199	KOG1238	COG2303,PLN02785,PRK02106,TIGR01810,TIGR03970
BC1G_02036	Y	-	M	350	18	332	1.20482	4	6	0	--	2	extr=26	-	-	0	pfam00150	-	COG3934
BC1G_02060	Y	-	M	162	19	143	4.1958	6	3	0	--	2	extr=25	-	-	0	-	-	-
BC1G_02163	Y	-	M	137	18	119	3.36134	4	3	0	--	-	extr=26	-	-	0	pfam07249	-	-
BC1G_02314	Y	-	M	506	19	487	1.23203	6	18	0	--	3	extr=25	-	-	0	pfam00328	KOG1382	cd07061
BC1G_02333	Y	-	M	401	22	379	4.22164	16	8	0	--	3	extr=26	-	-	0	pfam00686	-	PLN02950,cd05467,cd05807,cd05808,cd05809,cd05810,cd05811,cd05815,cd05816,cd05817,cd05818,cd05820,smart01065
BC1G_02364	Y	-	M	777	18	759	0.527009	4	23	0	--	3	extr=21	-	-	0	pfam00933,pfam01915,pfam14310	-	COG1472,PLN03080,PRK15098
BC1G_02365	Y	-	M	417	17	400	1.25	5	11	0	--	3	extr=27	-	-	0	-	-	COG2730
BC1G_02388	Y	-	M	223	20	203	3.94089	8	3	0	--	2	extr=23	-	-	0	-	-	-
BC1G_02410	Y	-	M	1007	18	989	0.606673	6	29	0	--	3	extr=26	-	-	1	pfam01301,pfam10435,pfam13363,pfam13364	KOG0496	COG1874,PLN03059,smart01029
BC1G_02480	Y	-	M	67	26	41	0	0	0	0	--	-	extr=19	-	-	0	-	-	-
BC1G_02486	Y	-	M	536	20	516	1.93798	10	10	0	--	3	extr=26	-	-	0	pfam07519	-	-
BC1G_02487	Y	-	M	524	20	504	0.396825	2	10	0	--	2	extr=27	-	-	0	pfam00135	KOG1516,KOG4389	COG2272,cd00312
BC1G_02492	Y	-	M	409	23	386	0.777202	3	4	0	--	4	extr=23	-	-	0	pfam11790	-	-
BC1G_02541	Y	-	M	269	17	252	1.5873	4	1	0	--	2	extr=20	-	-	0	pfam03443	-	-
BC1G_02591	Y	-	M	454	23	431	1.62413	7	15	0	--	2	extr=22	-	-	0	pfam02065	KOG2366	COG3345,PLN02229,PLN02692,PLN02808,PLN02899,PLN03231
BC1G_02623	Y	-	M	427	25	402	2.23881	9	13	0	--	2	extr=27	-	-	1	pfam00128,pfam09260	KOG0471	COG0366,cd00551,cd11315,cd11319,cd11320,cd11337,cd11338,cd11339,cd11340,smart00642
BC1G_02643	Y	-	M	141	19	122	6.55738	8	3	0	--	-	extr=25	-	-	0	-	-	-
BC1G_02676	Y	-	M	127	25	102	7.84314	8	5	0	--	-	extr=27	-	-	1	-	-	-
BC1G_02701	Y	-	M	139	22	117	8.54701	10	2	0	--	2	extr=22	-	-	0	-	-	-
BC1G_02702	Y	-	M	344	16	328	0.304878	1	15	0	--	6	extr=25	-	-	1	-	KOG0379,KOG4441,KOG4693	COG3055,PHA03098,PRK14131,TIGR03547,TIGR03548
BC1G_02714	Y	-	M	340	19	321	5.60748	18	4	0	--	3	extr=27	-	-	0	-	-	cd00599,cd06416
BC1G_02731	Y	-	M	756	19	737	1.22117	9	15	0	--	5	extr=27	-	-	0	pfam12708	-	-
BC1G_02738	Y	-	M	617	23	594	2.3569	14	7	0	--	6	extr=22	-	-	0	pfam03659	-	cd11573,cd11577
BC1G_02740	Y	-	M	422	19	403	1.24069	5	10	0	--	2	extr=22	-	-	1	-	-	-
BC1G_02755	Y	-	M	244	20	224	0.892857	2	7	0	--	-	extr=27	-	-	0	-	-	-
BC1G_02790	Y	-	M	249	17	232	0.862069	2	3	0	--	3	extr=22	-	-	0	pfam01828	-	-
BC1G_02834	Y	-	M	170	19	151	5.29801	8	3	0	--	-	extr=19	-	-	0	-	-	-
BC1G_02944	Y	-	M	587	18	569	1.58172	9	11	0	--	3	extr=26	-	-	0	pfam09286	-	COG4934,cd04056,cd11377,smart00944
BC1G_02965	Y	-	M	438	19	419	0.238663	1	13	0	--	3	extr=18	-	-	0	pfam04185	-	-
BC1G_02986	Y	-	M	168	19	149	2.68456	4	4	0	--	2	extr=26	-	-	0	pfam02221	KOG4680	cd00912,cd00917,smart00737
BC1G_03038	Y	-	M	257	19	238	2.10084	5	3	0	--	4	extr=21	-	-	0	pfam00734	-	smart00236
BC1G_03045	Y	-	M	135	19	116	0.862069	1	2	0	--	-	extr=26	-	-	1	pfam02089	KOG2541	-
BC1G_03065	Y	-	M	61	20	41	0	0	0	0	--	-	extr=24	-	-	1	-	-	-
BC1G_03070	Y	-	M	389	17	372	0.537634	2	3	0	--	3	extr=27	-	-	0	pfam00026	KOG1339	PTZ00013,PTZ00147,PTZ00165,cd05471,cd05472,cd05473,cd05474,cd05476,cd05477,cd05478,cd05485,cd05486,cd05487,cd05488,cd05490,cd06096,cd06097,cd06098
BC1G_03086	Y	-	M	582	20	562	1.9573	11	12	0	--	3	extr=22	-	-	0	pfam07519	-	-
BC1G_03097	Y	-	M	505	25	480	1.04167	5	18	0	--	2	extr=26	-	-	0	pfam00135	KOG1516,KOG4389	COG2272,cd00312
BC1G_03179	Y	-	M	783	19	764	0.78534	6	27	0	--	4	extr=24	-	-	0	pfam00933,pfam01915,pfam14310	-	COG1472,PLN03080,PRK15098
BC1G_03205	Y	-	M	223	18	205	0	0	4	0	--	2	extr=24	-	-	0	-	-	-
BC1G_03220	Y	-	M	931	21	910	0.769231	7	34	0	--	3	extr=24	-	-	1	pfam00732,pfam05199	KOG1238	COG2303,PRK02106,TIGR01810,TIGR03970
BC1G_03298	Y	-	M	194	17	177	0.564972	1	4	0	--	3	extr=25	-	-	0	-	KOG3017	cd05380,cd05382,smart00198
BC1G_03406	Y	-	M	277	21	256	0.390625	1	9	0	--	2	extr=25	-	-	1	pfam01328	-	-
BC1G_03412	Y	-	M	54	26	28	0	0	0	0	--	-	extr=19	-	-	0	-	-	-
BC1G_03464	Y	-	M	444	22	422	2.60664	11	5	0	--	4	extr=27	-	-	0	pfam00295	-	PLN02155,PLN02188,PLN02218,PLN02793,PLN03003,PLN03010
BC1G_03557	Y	-	M	204	18	186	2.15054	4	5	0	--	2	extr=26	-	-	0	pfam07510	-	-
BC1G_03560	Y	-	M	414	18	396	2.27273	9	11	0	--	3	extr=25	-	-	1	-	-	-
BC1G_03567	Y	-	M	1012	18	994	0.201207	2	25	0	--	5	extr=25	-	-	0	pfam01301,pfam10435,pfam13363,pfam13364	KOG0496	COG1874,PLN03059,smart01029
BC1G_03579	Y	-	M	432	19	413	0.484262	2	6	0	--	2	extr=26	-	-	1	pfam00026	KOG1339	PTZ00013,PTZ00147,PTZ00165,cd05470,cd05471,cd05473,cd05474,cd05477,cd05478,cd05485,cd05486,cd05487,cd05488,cd05490,cd06097,cd06098
BC1G_03590	Y	-	M	281	19	262	2.29008	6	4	0	--	2	extr=26	-	-	0	pfam00457,pfam00734	-	-
BC1G_03591	Y	-	M	81	18	63	9.52381	6	3	0	--	-	extr=19	-	-	0	-	-	-
BC1G_03596	Y	-	M	149	26	123	0.813008	1	4	0	--	-	extr=23	-	-	0	-	-	-
BC1G_03619	Y	-	M	447	22	425	2.35294	10	7	0	--	2	extr=26	-	-	0	pfam00295	-	COG5434,PLN02188,PLN02218,PLN03003,PLN03010
BC1G_03710	Y	-	M	572	19	553	1.62749	9	16	0	--	3	extr=25	-	-	0	pfam00450	KOG1282,KOG1283	COG2939,PLN02209,PLN03016,PTZ00472
BC1G_03711	Y	-	M	546	15	531	2.07156	11	12	0	--	3	extr=23	-	-	0	pfam00450,pfam05388	KOG1282,KOG1283	COG2939,PLN02209,PLN03016,PTZ00472
BC1G_03813	Y	-	M	504	22	482	0.207469	1	11	0	--	3	extr=24	-	-	0	pfam00190,pfam07883	-	COG0662,COG2140,TIGR03404,smart00835
BC1G_03849	Y	-	M	301	17	284	2.46479	7	3	0	--	3	extr=26	-	-	0	-	-	-
BC1G_03859	Y	-	M	396	45	351	1.1396	4	13	0	--	2	extr=24	-	-	1	pfam01301	KOG0496	PLN03059
BC1G_03881	Y	-	M	407	24	383	1.04439	4	11	0	--	2	extr=23	-	-	0	pfam03663	-	COG4833
BC1G_03886	Y	-	M	536	20	516	0.387597	2	9	0	--	2	extr=26	-	-	0	pfam00135	KOG1516,KOG4389	COG2272,cd00312
BC1G_03951	Y	-	M	828	19	809	8.03461	65	9	0	--	12	extr=25	-	-	0	-	-	-
BC1G_03976	Y	-	M	566	20	546	1.4652	8	14	0	--	3	extr=25	-	-	1	pfam08386	-	-
BC1G_03977	Y	-	M	183	17	166	2.40964	4	5	0	--	2	extr=20	-	-	0	-	-	-
BC1G_04043	Y	-	M	611	18	593	0.337268	2	20	0	--	2	extr=25	-	-	0	pfam00732,pfam05199	KOG1238	COG2303,PLN02785,PRK02106,TIGR01810,TIGR03970
BC1G_04089	Y	-	M	250	15	235	0.425532	1	5	0	--	2	extr=25	-	-	0	-	-	cd00866
BC1G_04092	Y	-	M	532	21	511	0.195695	1	15	0	--	3	extr=26	-	-	2	pfam00264	-	-
BC1G_04114	Y	-	M	193	17	176	1.13636	2	3	0	--	-	extr=18	-	-	0	-	-	-
BC1G_04233	Y	-	M	409	20	389	1.02828	4	14	0	--	2	extr=26	-	-	0	pfam01263	KOG1604	COG2017,PLN00194,PRK11055,PTZ00485,TIGR02636,cd01081,cd09019,cd09021
BC1G_04246	Y	-	M	428	16	412	3.64078	15	2	0	--	4	extr=27	-	-	2	pfam00295	-	COG5434,PLN02155,PLN02188,PLN02218,PLN02793,PLN03003,PLN03010
BC1G_04267	Y	-	M	208	19	189	0.529101	1	7	0	--	-	extr=24	-	-	2	-	-	-
BC1G_04280	Y	-	M	61	20	41	7.31707	3	1	0	--	-	extr=21	-	-	0	-	-	-
BC1G_04347	Y	-	M	191	17	174	3.44828	6	5	0	--	2	extr=20	-	-	1	-	-	-
BC1G_04368	Y	-	M	238	20	218	0	0	4	0	--	5	extr=27	-	-	0	-	-	-
BC1G_04506	Y	-	M	105	21	84	15.4762	13	1	0	--	2	extr=27	-	-	1	-	-	-
BC1G_04515	Y	-	M	386	22	364	1.64835	6	2	0	--	4	extr=25	-	-	0	-	-	cd01846
BC1G_04521	Y	-	M	167	24	143	5.59441	8	4	0	--	3	extr=25	-	-	1	-	-	-
BC1G_04660	Y	-	M	154	22	132	6.06061	8	0	0	--	2	extr=26	-	-	0	-	-	-
BC1G_04810	Y	-	M	271	21	250	2.4	6	5	0	--	2	extr=26	-	-	1	pfam00089	KOG3627	COG5640,cd00190,smart00020
BC1G_04919	Y	-	M	389	21	368	0.271739	1	14	0	--	2	extr=24	-	-	0	pfam03403	KOG3847	-
BC1G_04935	Y	-	M	282	17	265	10.1887	27	7	0	--	4	extr=27	-	-	0	-	-	-
BC1G_04947	Y	-	M	313	18	295	1.01695	3	10	0	--	2	extr=23	-	-	1	pfam03663	-	-
BC1G_04955	Y	-	M	537	19	518	1.1583	6	22	0	--	2	extr=24	-	-	0	pfam00141	-	cd00314,cd08201
BC1G_04994	Y	-	M	506	26	480	1.66667	8	14	0	--	4	extr=26	-	-	0	pfam05270,pfam09206	-	-
BC1G_05010	Y	-	M	573	22	551	1.08893	6	19	0	--	5	extr=26	-	-	0	pfam01412	KOG0521,KOG0703,KOG0704,KOG0705,KOG0706,KOG0818,KOG1117	COG5347,PLN03114,PLN03131,smart00105
BC1G_05033	Y	-	M	234	17	217	1.38249	3	10	0	--	5	extr=26	-	-	0	pfam14021	-	-
BC1G_05056	Y	-	M	210	19	191	1.04712	2	6	0	--	2	extr=27	-	-	0	-	-	smart00754
BC1G_05076	Y	-	M	372	19	353	0.849858	3	5	0	--	2	extr=25	-	-	0	-	-	-
BC1G_05134	Y	-	M	147	19	128	6.25	8	1	0	--	2	extr=25	-	-	0	-	-	-
BC1G_05199	Y	-	M	206	18	188	2.12766	4	1	0	--	2	extr=20	-	-	0	pfam01083	-	-
BC1G_05442	Y	-	M	323	17	306	1.30719	4	4	0	--	2	extr=27	-	-	0	-	-	-
BC1G_05455	Y	-	M	365	22	343	2.04082	7	2	0	--	4	extr=26	-	-	1	pfam00704	KOG4701	cd02877
BC1G_05478	Y	-	M	196	16	180	1.11111	2	6	0	--	-	extr=18	-	-	0	-	-	-
BC1G_05479	Y	-	M	133	21	112	1.78571	2	14	0	--	2	extr=20	-	52--66	0	-	-	-
BC1G_05488	Y	-	M	411	19	392	0.255102	1	15	0	--	2	extr=24	-	-	0	pfam05426	-	-
BC1G_05517	Y	-	M	569	20	549	1.63934	9	12	0	--	4	extr=27	-	-	1	pfam01565,pfam08031	-	COG0277
BC1G_05539	Y	-	M	742	22	720	3.19444	23	13	0	--	6	extr=26	-	-	0	pfam03659	-	cd11573,cd11577
BC1G_05542	Y	-	M	295	18	277	2.16606	6	9	0	--	3	extr=27	-	-	1	-	-	-
BC1G_05576	Y	-	M	269	21	248	2.82258	7	6	0	--	2	extr=26	-	-	1	pfam11790	-	-
BC1G_05590	Y	-	M	89	18	71	0	0	2	0	--	2	extr=18	-	-	0	-	-	-
BC1G_05646	Y	-	M	185	22	163	2.45399	4	8	0	--	2	extr=25	-	-	0	-	-	-
BC1G_05658	Y	-	M	131	17	114	0	0	3	0	--	3	extr=25	-	-	0	-	-	-
BC1G_05765	Y	-	M	779	21	758	1.31926	10	24	0	--	3	extr=22	-	-	1	pfam09286	-	COG4934,cd04056,cd11377,smart00944
BC1G_05866	Y	-	M	109	22	87	6.89655	6	4	0	--	-	extr=24	-	-	0	-	-	-
BC1G_05885	Y	-	M	374	17	357	1.96078	7	6	0	--	5	extr=26	-	-	0	-	-	-
BC1G_05925	Y	-	M	323	22	301	1.99336	6	4	0	--	2	extr=24	-	-	0	-	KOG4701	cd02877
BC1G_05961	Y	-	M	278	20	258	2.32558	6	5	0	--	2	extr=23	-	-	0	pfam00295	-	PLN02155,PLN02188,PLN02218,PLN03003,PLN03010
BC1G_05976	Y	-	M	159	17	142	1.40845	2	2	0	--	3	extr=24	-	-	0	-	-	-
BC1G_05986	Y	-	M	437	18	419	0.477327	2	7	0	--	2	extr=23	-	-	0	pfam01565	-	COG0277
BC1G_06005	Y	-	M	58	18	40	2.5	1	2	0	--	-	extr=21	-	-	0	-	-	-
BC1G_06019	Y	-	M	139	18	121	5.78512	7	2	0	--	2	extr=22	-	-	1	-	-	-
BC1G_06035	Y	-	M	516	17	499	4.40882	22	9	0	--	3	extr=26	-	-	0	pfam00734,pfam00840	-	cd07999,smart00236
BC1G_06114	Y	-	M	351	17	334	2.39521	8	8	0	--	2	extr=24	-	-	0	pfam11327	-	-
BC1G_06211	Y	-	M	136	17	119	3.36134	4	2	0	--	2	extr=25	-	-	0	-	-	-
BC1G_06237	Y	-	M	400	17	383	1.04439	4	15	0	--	2	extr=24	-	-	2	pfam01425	KOG1211	COG0154,PRK00012,PRK06707,PRK06828,PRK08137,TIGR00132
BC1G_06274	Y	-	M	193	19	174	1.72414	3	7	0	--	2	extr=27	-	-	1	pfam01083	-	-
BC1G_06310	Y	-	M	246	20	226	1.32743	3	10	0	--	3	extr=24	-	-	1	pfam05630	-	-
BC1G_06314	Y	-	M	180	20	160	1.25	2	5	0	--	-	extr=24	-	-	0	-	-	-
BC1G_06328	Y	-	M	645	20	625	0.48	3	22	0	--	3	extr=27	-	-	0	pfam05592	-	-
BC1G_06334	Y	-	M	516	17	499	1.2024	6	11	0	--	2	extr=26	-	-	1	pfam01565	KOG1231	COG0277,PLN02441,TIGR01678
BC1G_06369	Y	-	M	256	17	239	1.67364	4	3	0	--	2	extr=27	-	-	0	pfam01083	-	-
BC1G_06380	Y	-	M	94	15	79	0	0	4	0	--	-	extr=22	-	-	1	pfam00795	-	cd07197,cd07564
BC1G_06463	Y	-	M	549	18	531	1.50659	8	11	0	--	3	extr=25	-	-	0	pfam00128,pfam09260	KOG0471,KOG2212	COG0366,COG3280,PRK09505,PRK10785,PRK10933,TIGR02403,cd00551,cd11313,cd11314,cd11315,cd11316,cd11319,cd11320,cd11328,cd11330,cd11331,cd11332,cd11333,cd11334,cd11338,cd11339,cd11340,cd11348,cd11350,cd11352,cd11359,smart00642
BC1G_06509	Y	-	M	484	18	466	6.00858	28	9	0	--	3	extr=25	-	-	0	pfam01522	-	COG0726,TIGR02764,TIGR02884,TIGR03006,cd10585,cd10916,cd10917,cd10918,cd10938,cd10941,cd10943,cd10944,cd10946,cd10947,cd10948,cd10949,cd10950,cd10951,cd10952,cd10953,cd10954,cd10955,cd10956,cd10958,cd10959,cd10960,cd10962,cd10967,cd10970,cd11618
BC1G_06546	Y	-	M	460	20	440	2.04545	9	14	0	--	2	extr=25	-	-	1	pfam02065	KOG2366	COG3345,PLN02229,PLN02692,PLN02808,PLN02899,PLN03231
BC1G_06727	Y	-	M	173	20	153	0	0	5	0	--	-	extr=18	-	-	0	pfam12296	-	-
BC1G_06769	Y	-	M	542	17	525	2.28571	12	6	0	--	3	extr=25	-	-	0	-	-	-
BC1G_06815	Y	-	M	933	21	912	2.96053	27	5	0	--	10	extr=25	-	-	0	-	-	-
BC1G_06836	Y	-	M	521	16	505	0.594059	3	10	0	--	2	extr=24	-	-	0	pfam00082,pfam05922	KOG1153	COG1404,PTZ00262,TIGR03895,TIGR03921,cd00306,cd04059,cd04077,cd04842,cd04843,cd04848,cd04852,cd05561,cd05562,cd07473,cd07474,cd07475,cd07476,cd07477,cd07478,cd07480,cd07481,cd07482,cd07483,cd07484,cd07485,cd07487,cd07489,cd07490,cd07492,cd07493,cd07496,cd07498
BC1G_06840	Y	-	M	242	25	217	0.460829	1	7	0	--	2	extr=27	-	-	1	pfam01095	-	PLN02170,PLN02176,PLN02197,PLN02201,PLN02217,PLN02301,PLN02304,PLN02313,PLN02314,PLN02416,PLN02432,PLN02468,PLN02480,PLN02484,PLN02488,PLN02497,PLN02506,PLN02634,PLN02665,PLN02671,PLN02682,PLN02698,PLN02708,PLN02713,PLN02745,PLN02773,PLN02916,PLN02933,PLN02990,PLN02995,PLN03043
BC1G_06893	Y	-	M	512	19	493	1.21704	6	28	0	--	2	extr=19	-	-	3	pfam00067	KOG0156,KOG0157,KOG0158,KOG0159,KOG0684	COG2124,PLN00110,PLN02169,PLN02183,PLN02290,PLN02302,PLN02426,PLN02655,PLN02738,PLN02936,PLN02966,PLN02987,PLN03018,PLN03112,PLN03195,PLN03234,PTZ00404
BC1G_07052	Y	-	M	236	19	217	5.52995	12	3	0	--	2	extr=23	-	-	0	pfam03211	-	-
BC1G_07058	Y	-	M	491	18	473	1.69133	8	6	0	--	3	extr=25	-	-	1	pfam03659	-	cd11573,cd11575,cd11577
BC1G_07073	Y	-	M	221	17	204	1.96078	4	2	0	--	3	extr=26	-	-	0	pfam11937	-	-
BC1G_07101	Y	-	M	857	22	835	0.598802	5	23	0	--	5	extr=27	-	-	1	pfam05592	-	-
BC1G_07110	Y	-	M	804	20	784	0.892857	7	26	0	--	2	extr=24	-	-	0	pfam00933,pfam01915,pfam14310	-	COG1472,PLN03080,PRK15098
BC1G_07149	Y	-	M	563	19	544	1.10294	6	15	0	--	3	extr=25	-	-	0	pfam00450	KOG1282,KOG1283	COG2939,PLN02209,PLN03016,PTZ00472
BC1G_07160	Y	-	M	290	17	273	2.1978	6	7	0	--	3	extr=25	-	-	1	-	-	cd08557,cd08586,cd08587,cd08588,cd08590
BC1G_07173	Y	-	M	251	19	232	1.72414	4	4	0	--	2	extr=26	-	-	0	-	-	-
BC1G_07175	Y	-	M	103	20	83	7.22892	6	1	0	--	-	extr=27	-	-	1	-	-	-
BC1G_07215	Y	-	M	599	17	582	1.20275	7	16	0	--	2	extr=25	-	-	0	pfam00728	KOG2499	COG3525,cd02742,cd06562,cd06563,cd06564,cd06565,cd06568,cd06569,cd06570
BC1G_07220	Y	-	M	565	24	541	1.47874	8	5	0	--	5	extr=25	-	-	0	pfam10528	-	-
BC1G_07275	Y	-	M	756	21	735	0.952381	7	24	0	--	3	extr=23	-	-	0	-	-	-
BC1G_07314	Y	-	M	283	17	266	0.75188	2	0	0	--	3	extr=19	-	-	1	-	-	-
BC1G_07319	Y	-	M	781	21	760	1.18421	9	13	0	--	3	extr=26	-	-	0	pfam12708	-	-
BC1G_07326	Y	-	M	346	20	326	0	0	20	0	--	12	extr=21	-	-	0	-	-	-
BC1G_07477	Y	-	M	58	18	40	2.5	1	1	0	--	-	extr=19	-	-	0	-	-	-
BC1G_07482	Y	-	M	483	15	468	0.641026	3	14	0	--	3	extr=23	-	-	0	pfam01565	KOG1231	COG0277
BC1G_07483	Y	-	M	453	20	433	0.923788	4	9	0	--	4	extr=27	-	-	0	pfam03583	-	-
BC1G_07521	Y	-	M	403	17	386	0.518135	2	6	0	--	3	extr=26	-	-	0	pfam00026	KOG1339	PTZ00013,PTZ00147,PTZ00165,cd05470,cd05471,cd05473,cd05474,cd05477,cd05478,cd05485,cd05486,cd05487,cd05488,cd05490,cd06097,cd06098
BC1G_07527	Y	-	M	388	21	367	1.63488	6	6	0	--	4	extr=27	-	-	0	pfam00544	-	COG3866,smart00656
BC1G_07558	Y	-	M	377	24	353	0.283286	1	13	0	--	2	extr=18	-	-	1	pfam04488	-	COG3774
BC1G_07577	Y	-	M	85	24	61	1.63934	1	0	0	--	-	extr=23	-	-	0	-	-	-
BC1G_07608	Y	-	M	309	20	289	0.692042	2	3	0	--	2	extr=25	-	-	0	pfam13668	-	-
BC1G_07611	Y	-	M	90	17	73	10.9589	8	3	0	--	-	extr=20	-	-	0	-	-	-
BC1G_07620	Y	-	M	579	23	556	0.539568	3	21	0	--	3	extr=20	-	-	0	pfam01019	KOG2410	COG0405,PLN02180,PLN02198,PRK09615,TIGR00066
BC1G_07622	Y	-	M	786	27	759	0.922266	7	24	0	--	3	extr=26	-	-	1	pfam00933,pfam01915,pfam14310	-	COG1472,PLN03080,PRK15098
BC1G_07637	Y	-	M	556	17	539	1.11317	6	13	0	--	4	extr=27	-	-	1	pfam00135	KOG1515,KOG1516,KOG4389	COG0657,COG2272,cd00312
BC1G_07653	Y	-	M	325	18	307	1.62866	5	1	0	--	3	extr=24	-	-	0	pfam03443	-	-
BC1G_07658	Y	-	M	376	20	356	1.1236	4	2	0	--	4	extr=25	-	-	0	pfam03443	-	-
BC1G_07770	Y	-	M	508	16	492	1.21951	6	9	0	--	2	extr=22	-	-	1	pfam02225,pfam04389	KOG2195	COG2234,cd00538,cd02130,cd02133,cd02690,cd03876,cd03877,cd03879,cd04816,cd04818,cd08015
BC1G_07778	Y	-	M	480	23	457	1.53173	7	3	0	--	7	extr=25	-	-	0	-	-	-
BC1G_07794	Y	-	M	845	23	822	1.09489	9	22	0	--	3	extr=26	-	-	1	pfam00732,pfam05199	KOG1238	COG2303,PLN02785,PRK02106,TIGR01810,TIGR03970,cd09630
BC1G_07820	Y	-	M	561	33	528	1.70455	9	10	0	--	2	extr=24	-	-	0	pfam00128,pfam09260	KOG0470,KOG0471,KOG2212	COG0296,COG0366,COG3280,PRK09505,PRK10785,PRK10933,PRK14511,TIGR02401,TIGR02402,TIGR02403,TIGR02456,cd00551,cd11313,cd11314,cd11315,cd11316,cd11317,cd11319,cd11320,cd11323,cd11324,cd11325,cd11328,cd11330,cd11331,cd11332,cd11333,cd11334,cd11336,cd11337,cd11338,cd11339,cd11340,cd11347,cd11348,cd11350,cd11352,cd11353,cd11354,cd11359,smart00642
BC1G_07822	Y	-	M	599	19	580	0.344828	2	8	0	--	3	extr=25	-	-	0	pfam00150,pfam03442	-	COG2730
BC1G_07854	Y	-	M	298	17	281	0	0	7	0	--	3	extr=25	-	-	1	-	-	cd02871,cd06546
BC1G_07899	Y	-	M	237	19	218	1.83486	4	6	0	--	2	extr=26	-	-	1	pfam01083	-	-
BC1G_07945	Y	-	M	322	23	299	2.67559	8	3	0	--	3	extr=27	-	-	0	pfam00722	-	cd02181,cd08023
BC1G_07949	Y	-	M	231	20	211	5.6872	12	8	0	--	2	extr=26	-	-	0	-	-	-
BC1G_07950	Y	-	M	334	22	312	9.29487	29	4	0	--	4	extr=23	-	-	1	-	-	-
BC1G_07951	Y	-	M	419	24	395	6.07595	24	13	0	--	3	extr=24	-	-	0	-	-	-
BC1G_07974	Y	-	M	312	23	289	1.38408	4	9	0	--	2	extr=27	-	-	1	pfam00135,pfam07859	KOG1515,KOG1516,KOG4389	COG2272,cd00312
BC1G_08033	Y	-	M	370	21	349	2.29226	8	2	0	--	2	extr=26	-	-	0	pfam00295	-	COG5434,PLN02155,PLN02188,PLN02218,PLN02793,PLN03003,PLN03010
BC1G_08058	Y	-	M	239	19	220	1.81818	4	3	0	--	4	extr=21	-	-	0	-	-	-
BC1G_08063	Y	-	M	370	18	352	1.13636	4	6	0	--	4	extr=26	-	-	0	-	-	-
BC1G_08101	Y	-	M	351	22	329	0.303951	1	19	0	--	2	extr=19	-	-	0	-	-	COG1073
BC1G_08106	Y	-	M	381	16	365	2.46575	9	2	0	--	4	extr=25	-	-	0	-	-	-
BC1G_08110	Y	-	M	417	14	403	1.24069	5	15	0	--	2	extr=27	-	-	0	pfam03022	-	-
BC1G_08253	Y	-	M	581	18	563	1.7762	10	11	0	--	2	extr=26	-	-	0	pfam07519	-	-
BC1G_08280	Y	-	M	241	18	223	1.79372	4	8	0	--	-	extr=21	-	-	1	pfam00188	KOG3017	COG2340,cd00168,cd05380,cd05381,cd05382,cd05383,cd05384,cd05385,cd05559,smart00198
BC1G_08308	Y	-	M	389	18	371	3.2345	12	7	0	--	3	extr=26	-	-	0	pfam01822,pfam11790	KOG4157	smart00321
BC1G_08314	Y	-	M	234	23	211	2.36967	5	2	0	--	-	extr=26	-	-	0	pfam01083	-	-
BC1G_08354	Y	-	M	620	18	602	1.49502	9	12	0	--	3	extr=26	-	-	0	pfam09286	-	COG4934,cd04056,cd11377,smart00944
BC1G_08363	Y	-	M	96	18	78	12.8205	10	0	0	--	-	extr=26	-	-	0	-	-	-
BC1G_08370	Y	-	M	303	19	284	1.76056	5	4	0	--	-	extr=23	-	-	0	pfam00332	-	COG5309
BC1G_08372	Y	-	M	654	18	636	0.314465	2	14	0	--	3	extr=24	-	-	0	pfam06964	-	COG3534,smart00813
BC1G_08393	Y	-	M	399	15	384	1.04167	4	14	0	--	2	extr=25	-	-	0	pfam00026	KOG1339	PTZ00013,PTZ00147,cd05470,cd05471,cd05473,cd05477,cd05478,cd05485,cd05486,cd05487,cd05488,cd05490,cd06097,cd06098
BC1G_08414	Y	-	M	172	19	153	2.61438	4	0	0	--	2	extr=26	-	-	1	-	-	-
BC1G_08442	Y	-	M	174	19	155	3.87097	6	5	0	--	3	extr=25	-	-	0	-	-	-
BC1G_08544	Y	-	M	545	23	522	4.5977	24	18	0	--	4	extr=22	-	-	1	pfam01822,pfam09362	KOG4157	smart00321
BC1G_08574	Y	-	M	286	22	264	1.89394	5	3	0	--	2	extr=27	-	-	1	pfam08787	-	-
BC1G_08580	Y	-	M	168	21	147	4.08163	6	4	0	--	2	extr=25	-	-	1	-	-	-
BC1G_08585	Y	-	M	503	16	487	4.51745	22	18	0	--	2	extr=26	-	-	0	pfam01822,pfam09362	KOG4157	smart00321
BC1G_08615	Y	-	M	845	20	825	0.242424	2	28	0	--	3	extr=26	-	-	0	-	-	-
BC1G_08635	Y	-	M	208	19	189	2.1164	4	4	0	--	3	extr=26	-	-	1	-	-	-
BC1G_08638	Y	-	M	221	19	202	1.9802	4	3	0	--	2	extr=25	-	-	0	-	-	-
BC1G_08658	Y	-	M	424	21	403	0.992556	4	10	0	--	2	extr=25	-	-	0	pfam00246	KOG2649,KOG2650	COG2866,cd00596,cd03856,cd03858,cd03859,cd03860,cd03868,cd03870,cd03871,cd03872,cd06226,cd06227,cd06228,cd06229,cd06237,cd06245,cd06246,cd06247,cd06248,cd06905,smart00631
BC1G_08692	Y	-	M	220	21	199	3.01508	6	8	0	--	-	extr=27	-	-	0	pfam03443	-	-
BC1G_08735	Y	-	M	151	19	132	3.78788	5	4	0	--	-	extr=27	-	-	0	pfam07249	-	-
BC1G_08748	Y	-	M	493	17	476	0.840336	4	9	0	--	3	extr=26	-	-	1	-	-	-
BC1G_08749	Y	-	M	208	19	189	0.529101	1	4	0	--	3	extr=18	-	-	1	-	-	-
BC1G_08751	Y	-	M	208	19	189	0.529101	1	4	0	--	3	extr=18	-	-	1	-	-	-
BC1G_08755	Y	-	M	542	19	523	1.14723	6	23	0	--	2	extr=27	-	-	0	pfam00686,pfam00723	-	cd05467,cd05807,cd05808,cd05811,smart01065
BC1G_08757	Y	-	M	602	18	584	1.71233	10	13	0	--	4	extr=25	-	-	2	pfam08450	KOG1520	COG3386
BC1G_08801	Y	-	M	706	21	685	0.291971	2	23	0	--	4	extr=23	-	-	2	-	-	-
BC1G_08831	Y	-	M	669	16	653	1.68453	11	16	0	--	4	extr=25	-	-	0	pfam00450	KOG1282,KOG1283	COG2939,PLN02209,PLN03016,PTZ00472
BC1G_08904	Y	-	M	313	20	293	0.341297	1	18	0	--	3	extr=26	-	-	0	-	-	-
BC1G_08911	Y	-	M	56	19	37	2.7027	1	3	0	--	-	extr=19	-	-	0	-	-	-
BC1G_08924	Y	-	M	291	27	264	0.757576	2	5	0	--	4	extr=25	-	-	1	pfam00722	-	COG2273,cd00413,cd02181,cd02182,cd08023,cd08024
BC1G_08931	Y	-	M	246	16	230	0.869565	2	5	0	--	2	extr=24	-	-	0	pfam11327	-	-
BC1G_08975	Y	-	M	792	21	771	0.907912	7	20	0	--	3	extr=26	-	-	1	-	-	-
BC1G_08989	Y	-	M	457	19	438	2.28311	10	6	0	--	3	extr=27	-	-	0	pfam01341	-	COG5297
BC1G_08990	Y	-	M	411	19	392	3.06122	12	6	0	--	2	extr=26	-	-	0	pfam00150,pfam00734	-	COG2730,smart00236
BC1G_09000	Y	-	M	291	19	272	0	0	7	0	--	2	extr=23	-	-	0	pfam00544	-	COG3866,smart00656
BC1G_09013	Y	-	M	570	19	551	0.725953	4	17	0	--	3	extr=26	-	-	3	pfam00135	KOG1515,KOG1516,KOG2100,KOG4389	COG0657,COG2272,cd00312
BC1G_09029	Y	-	M	406	17	389	1.02828	4	20	0	--	3	extr=21	-	-	0	pfam00491	KOG2964,KOG2965	COG0010,PLN02615,PRK01722,PRK02190,PRK13775,TIGR01227,TIGR01229,TIGR01230
BC1G_09054	Y	-	M	151	18	133	3.00752	4	4	0	--	-	extr=26	-	-	0	-	-	-
BC1G_09084	Y	-	M	139	17	122	6.55738	8	1	0	--	2	extr=24	-	-	1	-	-	-
BC1G_09106	Y	-	M	329	21	308	0.649351	2	2	0	--	3	extr=24	-	-	1	-	-	-
BC1G_09121	Y	-	M	587	24	563	1.24334	7	20	0	--	3	extr=24	-	-	1	pfam00135,pfam07859	KOG1515,KOG1516,KOG4389	COG0657,COG2272,cd00312
BC1G_09122	Y	-	M	342	20	322	0	0	15	0	--	2	extr=21	-	-	0	-	-	COG1840
BC1G_09146	Y	-	M	810	21	789	1.52091	12	11	0	--	4	extr=26	-	-	0	pfam01522	-	COG0726,TIGR02764,TIGR02873,cd10917,cd10944,cd10947,cd10950,cd10951,cd10952,cd10953,cd10954,cd10956,cd10959,cd10962,cd10967
BC1G_09180	Y	-	M	353	17	336	2.38095	8	9	0	--	3	extr=24	-	-	0	pfam02102	-	cd11008
BC1G_09190	Y	-	M	635	22	613	1.14192	7	15	0	--	2	extr=26	-	-	0	pfam01565,pfam08031	-	-
BC1G_09210	Y	-	M	379	19	360	1.38889	5	5	0	--	3	extr=25	-	-	0	pfam00150	-	COG2730
BC1G_09240	Y	-	M	455	22	433	0.230947	1	10	0	--	4	extr=25	-	-	0	pfam00190,pfam07883	-	COG0662,COG2140,TIGR03404,smart00835
BC1G_09364	Y	-	M	436	22	414	0.724638	3	12	0	--	2	extr=24	-	-	0	pfam01328	-	-
BC1G_09391	Y	-	M	535	17	518	0.579151	3	8	0	--	2	extr=26	-	-	0	pfam00135	KOG1516,KOG4389	COG2272,cd00312
BC1G_09495	Y	-	M	513	23	490	2.04082	10	13	0	--	2	extr=27	-	-	1	pfam07519	-	-
BC1G_09564	Y	-	M	544	18	526	1.3308	7	17	0	--	2	extr=26	-	-	0	pfam05577	KOG2182,KOG2183	-
BC1G_09565	Y	-	M	411	18	393	1.01781	4	5	0	--	2	extr=25	-	-	0	pfam05577	KOG2182,KOG2183	-
BC1G_09594	Y	-	M	320	17	303	1.65017	5	3	0	--	4	extr=27	-	-	0	pfam00188	KOG3017	cd00168,cd05380,cd05381,cd05382,cd05383,cd05384,cd05385,cd05559,smart00198
BC1G_09613	Y	-	M	333	18	315	0	0	13	0	--	2	extr=18	-	-	2	pfam03345	KOG2754	-
BC1G_09644	Y	-	M	556	18	538	1.11524	6	20	0	--	3	extr=25	-	-	0	pfam00135	KOG1515,KOG1516,KOG4389	COG0657,COG2272,cd00312
BC1G_09656	Y	-	M	514	20	494	0.404858	2	5	0	--	4	extr=25	-	-	0	-	-	-
BC1G_09657	Y	-	M	328	18	310	1.29032	4	6	0	--	-	extr=21	-	-	1	-	-	-
BC1G_09694	Y	-	M	547	20	527	1.32827	7	11	0	--	2	extr=27	-	-	1	pfam00135,pfam07859	KOG1515,KOG1516,KOG4389	COG0657,COG2272,cd00312
BC1G_09789	Y	-	M	540	21	519	0.385356	2	12	0	--	8	extr=19	-	-	0	-	-	-
BC1G_09791	Y	-	M	454	18	436	0.917431	4	10	0	--	3	extr=27	-	-	1	-	-	-
BC1G_09803	Y	-	M	314	23	291	1.37457	4	2	0	--	5	extr=25	-	-	0	-	-	-
BC1G_09829	Y	-	M	333	21	312	2.88462	9	8	0	--	2	extr=25	-	-	0	-	-	cd02181,cd08023
BC1G_09883	Y	-	M	417	18	399	1.50376	6	7	0	--	2	extr=25	-	-	0	pfam12697	KOG1454	-
BC1G_09892	Y	-	M	357	16	341	2.93255	10	4	0	--	2	extr=27	-	-	0	pfam09792	-	-
BC1G_09968	Y	-	M	163	23	140	5	7	4	0	--	-	extr=23	-	-	0	-	-	-
BC1G_09991	Y	-	M	894	21	873	1.71821	15	7	0	--	5	extr=24	-	-	0	-	-	cd02181,cd08023
BC1G_09997	Y	-	M	594	19	575	1.04348	6	20	0	--	3	extr=25	-	-	0	pfam01425	KOG1211,KOG1212	COG0154,PLN02722,PRK00012,PRK05962,PRK06061,PRK06102,PRK06169,PRK06170,PRK06529,PRK06565,PRK06707,PRK06828,PRK07042,PRK07056,PRK07139,PRK07235,PRK07486,PRK07487,PRK07488,PRK07869,PRK08137,PRK08186,PRK08310,PRK09201,PRK11910,PRK12470,TIGR00132,TIGR02713,TIGR02715
BC1G_10075	Y	-	M	386	23	363	0.826446	3	13	0	--	3	extr=20	-	-	0	pfam04909	KOG4245	COG2159
BC1G_10091	Y	-	M	512	19	493	1.21704	6	16	0	--	-	extr=26	-	-	0	pfam00135,pfam07859	KOG1515,KOG1516,KOG4389	COG0657,COG2272,cd00312
BC1G_10095	Y	-	M	521	17	504	0.793651	4	12	0	--	2	extr=26	-	-	0	pfam13668	-	-
BC1G_10164	Y	-	M	346	19	327	0.917431	3	14	0	--	2	extr=22	-	-	1	pfam00300	KOG4754	COG0406,cd07040,cd07067,smart00855
BC1G_10221	Y	-	M	887	19	868	0.921659	8	24	0	--	3	extr=26	-	-	1	pfam00933,pfam01915,pfam14310	-	COG1472,PLN03080,PRK15098
BC1G_10229	Y	-	M	353	20	333	2.4024	8	7	0	--	3	extr=23	-	-	0	pfam03211	-	-
BC1G_10231	Y	-	M	888	21	867	0.922722	8	25	0	--	4	extr=27	-	-	2	pfam00933,pfam01915,pfam14310	-	COG1472,PLN03080,PRK05337,PRK15098
BC1G_10246	Y	-	M	192	19	173	2.31214	4	4	0	--	2	extr=26	-	-	0	-	-	-
BC1G_10247	Y	-	M	511	18	493	0.40568	2	17	0	--	2	extr=25	-	-	0	pfam00251	KOG0228	COG1621,TIGR01322,cd08772,cd08979,cd08995,cd08996,smart00640
BC1G_10306	Y	-	M	244	21	223	1.79372	4	3	0	--	2	extr=25	-	-	0	pfam05630	-	-
BC1G_10322	Y	-	M	319	18	301	1.3289	4	2	0	--	3	extr=26	-	-	2	pfam04616	-	cd08772,cd08978,cd08988,cd08990,cd08991,cd08998,cd08999
BC1G_10329	Y	-	M	663	15	648	1.54321	10	14	0	--	3	extr=27	-	-	0	pfam00394,pfam07731,pfam07732	KOG1263	COG2132,PLN00044,PLN02168,PLN02191,PLN02354,PLN02604,PLN02792,PLN02835,PLN02991,PRK10965,TIGR01480,TIGR03388,TIGR03389,TIGR03390
BC1G_10341	Y	-	M	471	24	447	0.223714	1	8	0	--	2	extr=25	-	-	1	pfam02156	-	COG4124,cd04083,cd04086
BC1G_10379	Y	-	M	386	17	369	3.25203	12	3	0	--	2	extr=26	-	-	0	-	-	-
BC1G_10381	Y	-	M	1169	22	1147	1.39494	16	58	0	--	10	extr=25	-	-	1	-	-	cd11618
BC1G_10397	Y	-	M	414	20	394	1.52284	6	6	0	--	2	extr=26	-	-	0	-	-	cd08557,cd08588,cd08590
BC1G_10445	Y	-	M	99	29	70	4.28571	3	4	0	--	-	extr=24	-	-	0	-	-	-
BC1G_10462	Y	-	M	133	19	114	1.75439	2	4	0	--	3	extr=20	-	-	0	-	-	-
BC1G_10466	Y	-	M	448	19	429	2.331	10	7	0	--	5	extr=26	-	-	0	-	-	-
BC1G_10473	Y	-	M	734	21	713	0.841515	6	8	0	--	5	extr=26	-	-	1	-	-	-
BC1G_10475	Y	-	M	409	17	392	1.53061	6	12	0	--	2	extr=27	-	-	0	-	-	-
BC1G_10486	Y	-	M	507	19	488	0.614754	3	10	0	--	3	extr=25	-	-	0	-	-	-
BC1G_10695	Y	-	M	328	18	310	2.58065	8	9	0	--	2	extr=26	-	-	0	-	-	-
BC1G_10768	Y	-	M	386	21	365	1.09589	4	16	0	--	2	extr=26	-	-	0	pfam00775	-	COG3485,cd00421,cd03457,cd03458,cd03459,cd03460,cd03461,cd03463
BC1G_10788	Y	-	M	492	16	476	0	0	11	0	--	2	extr=26	-	-	0	pfam00732,pfam05199	KOG1238	COG2303,PLN02785,PRK02106,PRK06370,TIGR01810,TIGR03970
BC1G_10789	Y	-	M	320	18	302	0.662252	2	5	0	--	2	extr=26	-	-	0	pfam03664	-	cd08987
BC1G_10791	Y	-	M	316	18	298	2.68456	8	11	0	--	-	extr=24	-	-	0	pfam13933	-	cd11008,cd11307
BC1G_10797	Y	-	M	519	21	498	0.60241	3	18	0	--	3	extr=27	-	-	0	pfam04616	-	COG3507,cd08772,cd08978,cd08988,cd08989,cd08991,cd09000,cd09001,cd09002
BC1G_10827	Y	-	M	715	21	694	0.432277	3	14	0	--	3	extr=24	-	-	0	pfam08760	-	-
BC1G_10861	Y	-	M	112	17	95	4.21053	4	5	0	--	-	extr=22	-	-	0	-	-	-
BC1G_10872	Y	-	M	354	16	338	0.591716	2	9	0	--	3	extr=25	-	-	0	pfam12006	-	-
BC1G_10880	Y	-	M	450	16	434	4.14747	18	8	0	--	3	extr=26	-	-	0	pfam00840	-	cd07999
BC1G_11080	Y	-	M	208	17	191	0	0	0	0	--	2	extr=24	-	-	0	-	-	-
BC1G_11115	Y	-	M	456	18	438	0.913242	4	19	0	--	3	extr=23	-	-	0	pfam01055,pfam13802	KOG1065,KOG1066	COG1501,PLN02763,cd06589,cd06591,cd06600,cd06601,cd06602,cd06603,cd06604
BC1G_11134	Y	-	M	296	17	279	2.15054	6	4	0	--	4	extr=24	-	-	0	pfam01975	-	COG0496,PRK00346,PRK13933,TIGR00087
BC1G_11139	Y	-	M	522	18	504	0.992063	5	20	0	--	3	extr=24	-	-	1	pfam13449	-	COG4222
BC1G_11143	Y	-	M	382	20	362	2.20994	8	3	0	--	5	extr=27	-	-	0	pfam00295	-	COG5434,PLN02155,PLN02188,PLN02218,PLN02793,PLN03003,PLN03010
BC1G_11144	Y	-	M	327	16	311	0.96463	3	6	0	--	3	extr=26	-	-	0	pfam01095	-	COG4677,PLN02170,PLN02176,PLN02197,PLN02201,PLN02217,PLN02301,PLN02304,PLN02313,PLN02314,PLN02416,PLN02432,PLN02468,PLN02480,PLN02484,PLN02488,PLN02497,PLN02506,PLN02634,PLN02665,PLN02671,PLN02682,PLN02698,PLN02708,PLN02713,PLN02745,PLN02773,PLN02916,PLN02933,PLN02990,PLN02995,PLN03043
BC1G_11259	Y	-	M	83	19	64	0	0	1	0	--	-	extr=18	-	-	1	-	-	-
BC1G_11266	Y	-	M	589	18	571	1.22592	7	17	0	--	2	extr=24	-	-	0	pfam00394,pfam07731,pfam07732	KOG1263	COG2132,PLN00044,PLN02168,PLN02191,PLN02354,PLN02604,PLN02792,PLN02835,PLN02991,PRK10965,TIGR01480,TIGR03388,TIGR03389,TIGR03390
BC1G_11288	Y	-	M	387	22	365	0.821918	3	9	0	--	3	extr=24	-	-	1	pfam01156	KOG2938	COG1957,PLN02717,PRK09955,PRK10443,PRK10768,cd00455,cd02647,cd02649,cd02650,cd02651,cd02653,cd02654
BC1G_11302	Y	-	M	326	17	309	0.323625	1	5	0	--	-	extr=20	-	-	1	pfam13668	-	-
BC1G_11306	Y	-	M	509	22	487	1.64271	8	13	0	--	5	extr=25	-	-	0	pfam00328	KOG1382	cd07061
BC1G_11403	Y	-	M	114	19	95	9.47368	9	2	0	--	2	extr=27	-	-	1	-	-	-
BC1G_11407	Y	-	M	429	24	405	0.246914	1	8	0	--	2	extr=25	-	-	1	pfam00704	KOG2806	COG3325,cd00598,cd02872,cd02874,cd02878,cd02879,cd06545,cd06548,smart00636
BC1G_11439	Y	-	M	641	21	620	0.967742	6	22	0	--	3	extr=27	-	-	0	pfam00933,pfam01915,pfam14310	-	COG1472,PRK15098
BC1G_11503	Y	-	M	100	20	80	7.5	6	1	0	--	-	extr=22	-	-	0	-	-	-
BC1G_11556	Y	-	M	663	25	638	1.09718	7	15	0	--	4	extr=19	-	-	1	pfam01565,pfam08031	-	COG0277
BC1G_11606	Y	-	M	158	21	137	1.45985	2	0	0	--	2	extr=26	-	-	0	-	-	-
BC1G_11690	Y	-	M	385	18	367	2.17984	8	7	0	--	2	extr=24	-	-	0	pfam00544	-	COG3866,smart00656
BC1G_11698	Y	-	M	361	21	340	2.94118	10	2	0	--	3	extr=26	-	-	0	pfam00445	KOG1642	cd00374,cd01061,cd01062
BC1G_11751	Y	-	M	452	18	434	1.84332	8	12	0	--	2	extr=24	-	-	1	pfam00328	KOG1382	cd07040,cd07061
BC1G_11795	Y	-	M	280	17	263	1.52091	4	4	0	--	2	extr=27	-	-	0	pfam11937	-	-
BC1G_11826	Y	-	M	412	25	387	3.61757	14	11	0	--	3	extr=26	-	-	0	-	-	cd11618
BC1G_11835	Y	-	M	468	17	451	0.886918	4	13	0	--	2	extr=25	-	-	1	pfam00328	KOG1382,KOG3720	cd07040,cd07061
BC1G_11891	Y	-	M	166	20	146	0.684932	1	2	0	--	2	extr=26	-	-	1	-	-	-
BC1G_11898	Y	-	M	294	19	275	1.81818	5	7	0	--	3	extr=25	-	-	0	pfam00332	-	COG5309
BC1G_11909	Y	-	M	412	20	392	3.06122	12	4	0	--	4	extr=26	-	-	0	pfam00295	-	COG5434,PLN02155,PLN02188,PLN02218,PLN02793,PLN03003,PLN03010
BC1G_11941	Y	-	M	218	17	201	2.48756	5	6	0	--	-	extr=21	-	-	1	-	-	-
BC1G_12003	Y	-	M	147	20	127	4.72441	6	2	0	--	2	extr=21	-	-	0	-	-	-
BC1G_12117	Y	-	M	588	26	562	0.88968	5	19	0	--	2	extr=26	-	-	2	pfam00732,pfam05199	KOG1238	COG2303,PLN02785,PRK02106,TIGR01810,TIGR03970
BC1G_12131	Y	-	M	251	22	229	0	0	5	0	--	2	extr=25	-	-	0	pfam03636	-	COG1554
BC1G_12132	Y	-	M	1003	22	981	0.509684	5	22	0	--	3	extr=25	-	-	0	pfam03632,pfam03636	KOG4125	COG1554,PRK13807
BC1G_12138	Y	-	M	581	23	558	0.358423	2	10	0	--	2	extr=27	-	-	0	pfam06964	-	COG3534,smart00813
BC1G_12139	Y	-	M	548	25	523	0.764818	4	18	0	--	3	extr=27	-	-	1	pfam00135	KOG1516,KOG4389	COG2272,cd00312
BC1G_12145	Y	-	M	636	18	618	0.809061	5	15	0	--	4	extr=26	-	-	0	pfam00754,pfam09118	KOG4441	cd00057,cd02851
BC1G_12157	Y	-	M	398	19	379	0.791557	3	17	0	--	2	extr=22	-	-	0	pfam00491	KOG2964,KOG2965	COG0010,PLN02615,PRK01722,PRK02190,PRK13773,TIGR01227,TIGR01229,TIGR01230
BC1G_12169	Y	-	M	137	18	119	5.04202	6	3	0	--	2	extr=23	-	-	0	-	-	-
BC1G_12171	Y	-	M	362	22	340	1.76471	6	6	0	--	4	extr=26	-	-	0	-	-	-
BC1G_12174	Y	-	M	504	18	486	0.617284	3	10	0	--	2	extr=24	-	-	0	pfam05426	-	-
BC1G_12229	Y	-	M	1156	24	1132	0.618375	7	12	0	--	8	extr=26	-	-	0	-	-	-
BC1G_12249	Y	-	M	518	25	493	0.608519	3	12	0	--	4	extr=26	-	-	1	pfam00135	KOG1516,KOG4389	COG2272,cd00312
BC1G_12292	Y	-	M	536	17	519	1.15607	6	4	0	--	6	extr=22	-	-	0	-	-	-
BC1G_12343	Y	-	M	932	16	916	0.545852	5	23	0	--	3	extr=27	-	-	0	pfam00082,pfam06280	-	PTZ00262,TIGR03921,cd00306,cd04077,cd04842,cd04848,cd04852,cd05561,cd05562,cd07473,cd07474,cd07475,cd07477,cd07478,cd07480,cd07481,cd07482,cd07483,cd07484,cd07485,cd07487,cd07489,cd07490,cd07496,cd07498
BC1G_12374	Y	-	M	187	17	170	2.35294	4	4	0	--	2	extr=26	-	-	0	-	-	-
BC1G_12379	Y	-	M	297	20	277	5.05415	14	5	0	--	2	extr=25	-	-	0	pfam01083	-	-
BC1G_12449	Y	-	M	433	19	414	1.20773	5	14	0	--	2	extr=26	-	-	0	pfam01328	-	-
BC1G_12450	Y	-	M	389	18	371	0	0	9	0	--	4	extr=27	-	-	0	-	-	-
BC1G_12455	Y	-	M	351	16	335	3.28358	11	6	0	--	3	extr=26	-	-	0	-	-	-
BC1G_12478	Y	-	M	415	18	397	1.25945	5	8	0	--	3	extr=25	-	-	0	pfam00150	-	COG2730
BC1G_12517	Y	-	M	384	20	364	1.64835	6	6	0	--	2	extr=26	-	-	0	pfam00544	-	COG3866,smart00656
BC1G_12522	Y	-	M	692	21	671	2.08644	14	13	0	--	2	extr=26	-	-	0	-	KOG3770	cd00842
BC1G_12525	Y	-	M	427	19	408	0.735294	3	10	0	--	2	extr=27	-	-	1	pfam01328	-	-
BC1G_12529	Y	-	M	124	18	106	1.88679	2	2	0	--	-	extr=21	-	-	1	-	-	-
BC1G_12537	Y	-	M	507	21	486	1.02881	5	9	0	--	2	extr=25	-	-	0	pfam01565	-	COG0277
BC1G_12619	Y	-	M	314	20	294	2.04082	6	4	0	--	2	extr=26	-	-	0	pfam11327	-	-
BC1G_12627	Y	-	M	471	19	452	2.43363	11	5	0	--	3	extr=26	-	-	0	pfam03856	-	-
BC1G_12680	Y	-	M	229	17	212	1.41509	3	4	0	--	2	extr=27	-	-	0	-	-	cd01837,cd01846
BC1G_12725	Y	-	M	172	16	156	0	0	1	0	--	2	extr=18	-	-	0	pfam12296	-	-
BC1G_12732	Y	-	M	143	22	121	2.47934	3	11	0	--	-	extr=18	-	-	0	-	-	-
BC1G_12747	Y	-	M	106	20	86	9.30233	8	1	0	--	2	extr=25	-	-	1	-	-	-
BC1G_12753	Y	-	M	185	19	166	4.81928	8	8	0	--	2	extr=24	-	-	0	-	-	-
BC1G_12766	Y	-	M	178	21	157	1.27389	2	2	0	--	2	extr=27	-	-	0	-	-	-
BC1G_12776	Y	-	M	615	19	596	1.00671	6	16	0	--	3	extr=26	-	-	0	pfam09286	-	COG4934,cd04056,cd11377,smart00944
BC1G_12793	Y	-	M	903	17	886	2.3702	21	15	0	--	8	extr=27	-	-	0	-	-	-
BC1G_12859	Y	-	M	997	22	975	0.820513	8	25	0	--	3	extr=27	-	-	0	pfam01055	KOG1065,KOG1066	COG1501,PLN02763,PRK10426,PRK10658,cd06589,cd06591,cd06593,cd06596,cd06598,cd06599,cd06600,cd06601,cd06602,cd06603,cd06604
BC1G_12867	Y	-	M	187	18	169	1.77515	3	4	0	--	2	extr=27	-	-	1	-	-	-
BC1G_12914	Y	-	M	539	20	519	1.92678	10	12	0	--	3	extr=26	-	-	0	pfam01735	KOG1325	cd00147,cd07200,cd07203,smart00022
BC1G_12927	Y	-	M	227	17	210	1.90476	4	3	0	--	4	extr=26	-	-	0	-	-	-
BC1G_12931	Y	-	M	181	20	161	1.24224	2	6	0	--	3	extr=21	-	-	0	-	-	-
BC1G_12932	Y	-	M	585	17	568	1.76056	10	15	0	--	2	extr=26	-	-	0	pfam07519	-	-
BC1G_13123	Y	-	M	272	18	254	0	0	4	0	--	2	extr=27	-	-	0	pfam00657,pfam13472	KOG3035	COG2755,cd00229,cd01821
BC1G_13137	Y	-	M	457	19	438	2.05479	9	12	0	--	3	extr=21	-	-	0	pfam00295	-	COG5434,PLN02155,PLN02188,PLN02218,PLN02793,PLN03003,PLN03010
BC1G_13139	Y	-	M	322	17	305	1.63934	5	2	0	--	2	extr=25	-	-	0	pfam03443	-	-
BC1G_13153	Y	-	M	1167	27	1140	0.350877	4	35	0	--	3	extr=27	-	-	2	-	-	-
BC1G_13158	Y	-	M	325	18	307	0.977199	3	10	0	--	2	extr=19	-	-	0	-	-	-
BC1G_13289	Y	-	M	204	19	185	4.32432	8	3	0	--	2	extr=25	-	-	0	-	-	-
BC1G_13367	Y	-	M	167	19	148	1.35135	2	3	0	--	-	extr=23	-	-	0	pfam00295	-	-
BC1G_13386	Y	-	M	625	35	590	0.508475	3	18	0	--	4	extr=25	-	-	0	pfam00732,pfam05199	KOG1238	COG2303,PLN02785,PRK02106,TIGR01810,TIGR03970
BC1G_13445	Y	-	M	641	18	623	0.963082	6	10	0	--	5	extr=24	-	-	0	-	-	-
BC1G_13543	Y	-	M	361	20	341	0.58651	2	12	0	--	-	extr=25	-	-	0	-	-	-
BC1G_13645	Y	-	M	222	19	203	0	0	7	0	--	2	extr=23	-	-	0	pfam00457	-	-
BC1G_13659	Y	-	M	1132	22	1110	4.23423	47	16	0	--	4	extr=25	-	-	1	pfam03659	-	cd11573,cd11575,cd11577
BC1G_13714	Y	-	M	423	16	407	1.9656	8	16	0	--	2	extr=26	-	-	0	pfam00135	KOG1515,KOG1516,KOG4389	COG0657,COG2272,cd00312
BC1G_13815	Y	-	M	579	31	548	1.82482	10	14	0	--	3	extr=26	-	-	0	pfam07519	-	-
BC1G_13846	Y	-	M	51	21	30	0	0	0	0	--	-	extr=21	-	-	0	-	-	-
BC1G_13855	Y	-	M	463	17	446	1.34529	6	6	0	--	3	extr=26	-	-	1	-	-	COG2730
BC1G_13862	Y	-	M	355	20	335	4.47761	15	3	0	--	3	extr=26	-	-	0	pfam02015	-	-
BC1G_13879	Y	-	M	84	16	68	11.7647	8	4	0	--	-	extr=22	-	-	0	-	-	-
BC1G_13881	Y	-	M	357	19	338	0.295858	1	13	0	--	2	extr=25	-	-	0	-	-	-
BC1G_13903	Y	-	M	585	20	565	1.41593	8	22	0	--	2	extr=23	-	-	0	pfam00884	KOG3731,KOG3867	COG1368,COG3083,COG3119,PRK13759
BC1G_13938	Y	-	M	384	18	366	0	0	9	0	--	5	extr=26	-	-	0	-	-	-
BC1G_13960	Y	-	M	567	19	548	0.912409	5	14	0	--	2	extr=27	-	-	0	pfam00135,pfam07859	KOG1515,KOG1516,KOG4389	COG0657,COG2272,cd00312
BC1G_13970	Y	-	M	432	23	409	2.44499	10	10	0	--	3	extr=26	-	-	0	pfam00295	-	COG5434,PLN02155,PLN02188,PLN02218,PLN02793,PLN03003,PLN03010
BC1G_14009	Y	-	M	256	18	238	1.68067	4	7	0	--	2	extr=25	-	-	0	-	-	cd01821
BC1G_14012	Y	-	M	678	19	659	0.758725	5	25	0	--	3	extr=24	-	-	0	pfam00732,pfam05199	KOG1238	COG2303,PLN02785,PRK02106,TIGR01810,TIGR03970
BC1G_14014	Y	-	M	280	19	261	0	0	4	0	--	3	extr=24	-	-	0	-	-	-
BC1G_14030	Y	-	M	540	25	515	2.71845	14	10	0	--	4	extr=27	-	-	0	pfam03198,pfam07983	-	smart00768
BC1G_14101	Y	-	M	383	19	364	1.0989	4	14	0	--	3	extr=26	-	-	0	pfam00246	KOG2650	cd00596,cd03859,cd03860,cd03870,cd03871,cd06226,cd06227,cd06228,cd06229,cd06246,cd06247,cd06248,cd06904,smart00631
BC1G_14129	Y	-	M	160	17	143	1.3986	2	2	0	--	3	extr=27	-	-	0	-	-	-
BC1G_14136	Y	-	M	88	20	68	2.94118	2	1	0	--	-	extr=24	-	-	1	-	-	-
BC1G_14153	Y	-	M	257	18	239	1.67364	4	3	0	--	3	extr=25	-	-	0	pfam01828	-	-
BC1G_14154	Y	-	M	225	17	208	0	0	5	0	--	3	extr=24	-	-	1	-	-	-
BC1G_14164	Y	-	M	869	17	852	0.938967	8	26	0	--	4	extr=24	-	-	1	pfam00933,pfam01915,pfam14310	-	COG1472,PLN03080,PRK15098
BC1G_14177	Y	-	M	526	22	504	1.38889	7	16	0	--	2	extr=26	-	-	0	pfam08031	-	COG0277
BC1G_14299	Y	-	M	348	18	330	2.12121	7	4	0	--	4	extr=24	-	-	0	-	-	-
BC1G_14317	Y	-	M	270	22	248	2.01613	5	5	0	--	3	extr=26	-	-	0	pfam00445	KOG1642	cd00374,cd01061
BC1G_14330	Y	-	M	572	19	553	1.26582	7	20	0	--	2	extr=26	-	-	0	pfam00732,pfam05199	KOG1238	COG2303,PRK02106,TIGR01790,TIGR01810,TIGR03970
BC1G_14348	Y	-	M	198	17	181	0.552486	1	2	0	--	3	extr=26	-	-	0	-	-	-
BC1G_14349	Y	-	M	710	18	692	1.30058	9	14	0	--	4	extr=25	-	-	1	pfam00394,pfam07731,pfam07732	KOG1263	COG2132,PLN00044,PLN02168,PLN02191,PLN02354,PLN02604,PLN02792,PLN02835,PLN02991,PRK10965,TIGR01480,TIGR03388,TIGR03389,TIGR03390
BC1G_14398	Y	-	M	331	17	314	2.2293	7	14	0	--	2	extr=24	-	-	0	pfam01266	KOG3923	TIGR02352
BC1G_14415	Y	-	M	241	21	220	3.18182	7	5	0	--	2	extr=24	-	-	1	pfam01083	-	-
BC1G_14418	Y	-	M	166	18	148	0	0	6	0	--	-	extr=20	-	-	0	-	-	-
BC1G_14469	Y	-	M	412	18	394	2.53807	10	8	0	--	3	extr=25	-	-	0	-	-	-
BC1G_14481	Y	-	M	251	20	231	3.4632	8	3	0	--	3	extr=26	-	-	0	-	-	-
BC1G_14501	Y	-	M	229	21	208	1.92308	4	6	0	--	2	extr=25	-	-	0	-	-	-
BC1G_14535	Y	-	M	124	26	98	2.04082	2	1	0	--	3	extr=23	-	-	0	-	-	-
BC1G_14570	Y	-	M	452	20	432	0.462963	2	12	0	--	2	extr=23	-	-	0	pfam00388	KOG4306	cd00137,cd08557,cd08586,cd08587,cd08616,cd08619,cd08621
BC1G_14591	Y	-	M	462	18	444	1.8018	8	8	0	--	3	extr=26	-	-	0	pfam00450	KOG1282,KOG1283	COG2939,PLN02209,PLN03016,PTZ00472
BC1G_14698	Y	-	M	574	20	554	1.44404	8	6	0	--	5	extr=23	-	-	0	-	-	-
BC1G_14702	Y	-	M	599	18	581	3.95869	23	5	0	--	6	extr=23	-	-	0	pfam00840	-	cd07999
BC1G_14711	Y	-	M	242	19	223	1.79372	4	8	0	--	-	extr=26	-	-	0	pfam11327	-	-
BC1G_14714	Y	-	M	350	17	333	0.600601	2	9	0	--	2	extr=22	-	-	0	pfam00710	KOG0503	COG0252,PRK04183,PRK09461,PRK11096,TIGR00519,TIGR00520,TIGR02153,cd00411,cd08962,cd08963,cd08964,smart00870
BC1G_14733	Y	-	M	261	22	239	0	0	4	0	--	3	extr=26	-	-	0	-	-	-
BC1G_14944	Y	-	M	421	22	399	2.00501	8	2	0	--	2	extr=26	-	-	0	pfam00704,pfam00734	KOG4701	cd02877,smart00236
BC1G_14954	Y	-	M	134	21	113	3.53982	4	3	0	--	2	extr=23	-	-	0	pfam03330	-	-
BC1G_14974	Y	-	M	515	21	494	1.01215	5	12	0	--	4	extr=25	-	-	0	pfam00141	-	cd00314,cd00691,cd00692,cd08201
BC1G_14990	Y	-	M	670	26	644	0.621118	4	26	0	--	3	extr=26	-	-	0	pfam00264	-	-
BC1G_15017	Y	-	M	247	18	229	2.62009	6	5	0	--	-	extr=21	-	-	0	pfam03443	-	-
BC1G_15041	Y	-	M	288	18	270	1.11111	3	10	0	--	2	extr=24	-	-	0	pfam10282	-	COG2706
BC1G_15095	Y	-	M	142	17	125	0	0	2	0	--	2	extr=23	-	-	0	-	-	-
BC1G_15118	Y	-	M	400	19	381	2.09974	8	9	0	--	2	extr=25	-	-	0	pfam00295	-	COG5434,PLN02155,PLN02218,PLN02793,PLN03003,PLN03010
BC1G_15341	Y	-	M	123	18	105	1.90476	2	1	0	--	-	extr=24	-	-	0	-	-	cd01846
BC1G_15524	Y	-	M	375	17	358	6.14525	22	10	0	--	6	extr=27	-	-	0	-	-	-
BC1G_15542	Y	-	M	193	18	175	2.28571	4	3	0	--	2	extr=26	-	-	0	-	-	-
BC1G_15641	Y	-	M	674	18	656	0.762195	5	25	0	--	5	extr=25	-	-	0	pfam00930	-	COG0823,PRK00178,PRK01029,PRK01742,PRK02889,PRK03629,PRK04792,PRK04922,PRK05137,TIGR02800
BC1G_15643	Y	-	M	278	20	258	1.55039	4	6	0	--	2	extr=24	-	-	0	pfam02265	-	cd10981,cd11010
BC1G_15646	Y	-	M	200	20	180	6.11111	11	4	0	--	-	extr=19	-	-	1	-	-	-
BC1G_15663	Y	-	M	694	22	672	0.297619	2	19	0	--	4	extr=25	-	-	1	pfam00326,pfam05448	KOG2100,KOG2281	COG1506
BC1G_15784	Y	-	M	431	22	409	3.91198	16	5	0	--	3	extr=26	-	-	0	pfam03856	-	-
BC1G_15977	Y	-	M	404	16	388	3.86598	15	7	0	--	2	extr=24	-	-	0	-	-	-
BC1G_16006	Y	-	M	207	18	189	0	0	3	0	--	2	extr=26	-	-	0	pfam01161	KOG3346	cd00866
BC1G_16107	Y	-	M	96	20	76	13.1579	10	2	0	--	3	extr=24	-	-	0	-	-	-
BC1G_16127	Y	-	M	438	19	419	0.954654	4	23	0	--	2	extr=25	-	-	0	pfam00135	KOG1516,KOG4389	COG2272,cd00312
BC1G_16238	Y	-	M	313	17	296	1.01351	3	5	0	--	2	extr=26	-	-	1	-	-	COG2730
BC1G_16413	Y	-	M	79	21	58	1.72414	1	0	0	--	-	extr=27	-	-	0	-	-	-

## Sheet: Table 3
Refined Secretome	GO and EC annotation	Description
BC1G_00003	GO:0016788	carbohydrate esterase family 16 protein
BC1G_00003	GO:0032266
BC1G_00003	GO:0000724
BC1G_00003	GO:0000910
BC1G_00003	GO:0006629
BC1G_00198	GO:0016798	glycoside hydrolase family 125 protein
BC1G_00198	GO:0008152
BC1G_00230	GO:0005576	endopolygalacturonase 5
BC1G_00230	GO:0004650
BC1G_00230	GO:0005975
BC1G_00230	GO:0071555
BC1G_00230	EC:3.2.1.15
BC1G_00240	GO:0005576	polygalacturonase partial
BC1G_00240	GO:0003677
BC1G_00240	GO:0004650
BC1G_00240	GO:0005975
BC1G_00240	GO:0071555
BC1G_00240	EC:3.2.1.15
BC1G_00245	GO:0016787	alpha- -mannosidase family protein
BC1G_00245	GO:0030246
BC1G_00245	GO:0005975
BC1G_00279	GO:0003847	paf acetylhydrolase family protein
BC1G_00279	GO:0016042
BC1G_00279	EC:3.1.1.47
BC1G_00279	EC:3.1.1.1
BC1G_00308	GO:0016788	sgnh hydrolase
BC1G_00308	GO:0006629
BC1G_00376	GO:0004620	lysophospholipase precursor
BC1G_00376	GO:0009395
BC1G_00376	EC:3.1.1
BC1G_00384	GO:0005576	carboxypeptidase s1
BC1G_00384	GO:0004185
BC1G_00384	GO:0006508
BC1G_00384	EC:3.4.21
BC1G_00384	EC:3.4.16
BC1G_00409	GO:0004553	glycoside hydrolase family 16 protein
BC1G_00409	GO:0005975
BC1G_00448	GO:0003824	extracellular serine-rich protein
BC1G_00448	GO:0005975
BC1G_00455	GO:0016020	glycoside hydrolase family 47 protein
BC1G_00455	GO:0004571
BC1G_00455	GO:0005509
BC1G_00455	GO:0008152
BC1G_00455	EC:3.2.1.113
BC1G_00455	EC:3.2.1.24
BC1G_00455	EC:3.2.1
BC1G_00545	GO:0004190	aspartic-type
BC1G_00545	GO:0006508
BC1G_00545	EC:3.4.23
BC1G_00576	GO:0005576	glycosyl hydrolase family 10 protein
BC1G_00576	GO:0030248
BC1G_00576	GO:0031176
BC1G_00576	GO:0045493
BC1G_00576	EC:3.2.1.8
BC1G_00594	GO:0005576	xyloglucan-specific endo-beta- -glucanase a
BC1G_00594	GO:0008810
BC1G_00594	GO:0030248
BC1G_00594	GO:0000272
BC1G_00594	EC:3.2.1.4
BC1G_00617	GO:0005618	pectin methylesterase
BC1G_00617	GO:0016798
BC1G_00617	GO:0030599
BC1G_00617	GO:0045330
BC1G_00617	GO:0005975
BC1G_00617	GO:0042545
BC1G_00617	EC:3.1.1.11
BC1G_00617	EC:3.1.1.1
BC1G_00639	GO:0016787	ferulic acid esterase feruloyl esterase
BC1G_00639	GO:0008152
BC1G_00642	GO:0008810	endo-beta- -glucanase precursor
BC1G_00642	GO:0005975
BC1G_00642	EC:3.2.1.4
BC1G_00689	GO:0016787	sphingomyelin phosphodiesterase
BC1G_00689	GO:0008152
BC1G_00750	GO:0016787	carboxylesterase
BC1G_00750	GO:0008152
BC1G_00837	GO:0016787	sad1 unc domain protein
BC1G_00837	GO:0008152
BC1G_00878	GO:0016740	amidase signature enzyme
BC1G_00878	GO:0016884
BC1G_00878	GO:0008152
BC1G_00912	GO:0005576	pectate lyase a
BC1G_00912	GO:0030570
BC1G_00912	GO:0070051
BC1G_00912	GO:0045490
BC1G_00912	EC:4.2.2.2
BC1G_00922	GO:0016787	glycoside hydrolase family 61 protein
BC1G_00922	GO:0008152
BC1G_00978	GO:0004252	tripeptidyl-peptidase 1 precursor
BC1G_00978	GO:0006508
BC1G_00978	EC:3.4.21
BC1G_00991	GO:0016491	aldehyde reductase protein
BC1G_00991	GO:0055114
BC1G_01000	GO:0016491	tyrosinase
BC1G_01000	GO:0046872
BC1G_01000	GO:0055114
BC1G_01008	GO:0005506	endoglucanase-1 precursor
BC1G_01008	GO:0008810
BC1G_01008	GO:0016708
BC1G_01008	GO:0051537
BC1G_01008	GO:0000272
BC1G_01008	GO:0019439
BC1G_01008	GO:0055114
BC1G_01008	EC:1.14.12
BC1G_01008	EC:3.2.1.4
BC1G_01012	GO:0005576	fungal hydrophobin
BC1G_01026	GO:0005576	tripeptidyl peptidase a
BC1G_01026	GO:0009277
BC1G_01026	GO:0030428
BC1G_01026	GO:0004252
BC1G_01026	GO:0045148
BC1G_01026	GO:0006508
BC1G_01026	EC:3.4.11
BC1G_01026	EC:3.4.21
BC1G_01026	EC:3.4.13
BC1G_01026	EC:3.4.11.4
BC1G_01033	GO:0016787	glycoside hydrolase family 55 protein
BC1G_01033	GO:0008152
BC1G_01073	GO:0005576	subtilisin-like protein
BC1G_01073	GO:0004252
BC1G_01073	GO:0005509
BC1G_01073	GO:0006508
BC1G_01073	EC:3.4.21
BC1G_01152	GO:0016787	glycoside hydrolase family 79 protein
BC1G_01152	GO:0008152
BC1G_01204	GO:0008061	carbohydrate-binding module family 18 protein
BC1G_01234	GO:0005576	glycoside hydrolase family 28 protein
BC1G_01234	GO:0004650
BC1G_01234	GO:0005975
BC1G_01234	GO:0071555
BC1G_01234	EC:3.2.1.15
BC1G_01286	GO:0004185	alpha beta-hydrolase
BC1G_01286	GO:0006508
BC1G_01286	EC:3.4.21
BC1G_01286	EC:3.4.16
BC1G_01397	GO:0004190	eukaryotic aspartyl protease
BC1G_01397	GO:0006508
BC1G_01397	EC:3.4.23
BC1G_01615	GO:0016787	alpha beta-hydrolase
BC1G_01615	GO:0008152
BC1G_01617	GO:0005576	glycoside hydrolase family 28 protein
BC1G_01617	GO:0004650
BC1G_01617	GO:0005975
BC1G_01617	GO:0071555
BC1G_01617	EC:3.2.1.15
BC1G_01628	GO:0004601	oxidase
BC1G_01628	GO:0055114
BC1G_01628	EC:1.11.1.7
BC1G_01630	GO:0008812	gmc oxidoreductase
BC1G_01630	GO:0050660
BC1G_01630	GO:0006066
BC1G_01630	GO:0055114
BC1G_01630	EC:1.1.99.1
BC1G_01674	GO:0019028	chitin binding protein
BC1G_01719	GO:0016614	gmc oxidoreductase
BC1G_01719	GO:0050660
BC1G_01719	GO:0055114
BC1G_01778	GO:0005576	endo- -beta-
BC1G_01778	GO:0030248
BC1G_01778	GO:0031176
BC1G_01778	GO:0000272
BC1G_01778	EC:3.2.1.8
BC1G_01789	GO:0008812	gmc oxidoreductase
BC1G_01789	GO:0050660
BC1G_01789	GO:0006066
BC1G_01789	GO:0055114
BC1G_01789	EC:1.1.99.1
BC1G_01794	GO:0004190	aspartic-type
BC1G_01794	GO:0006508
BC1G_01794	EC:3.4.23
BC1G_01803	GO:0004252	subtilisin-like protein
BC1G_01803	GO:0006508
BC1G_01803	EC:3.4.21
BC1G_01923	GO:0005576	murein transglycosylase
BC1G_01923	GO:0004650
BC1G_01923	GO:0005975
BC1G_01923	GO:0071555
BC1G_01923	EC:3.2.1.15
BC1G_02003	GO:0005576	endopolygalacturonase partial
BC1G_02003	GO:0004650
BC1G_02003	GO:0045490
BC1G_02003	GO:0071555
BC1G_02003	EC:3.2.1.15
BC1G_02011	GO:0008810	glycoside hydrolase family 26 protein
BC1G_02011	GO:0016985
BC1G_02011	GO:0006080
BC1G_02011	EC:3.2.1.25
BC1G_02011	EC:3.2.1.78
BC1G_02011	EC:3.2.1
BC1G_02011	EC:3.2.1.4
BC1G_02012	GO:0016787	glycoside hydrolase protein
BC1G_02012	GO:0008152
BC1G_02021	GO:0008812	glucose-methanol-choline oxidoreductase
BC1G_02021	GO:0050660
BC1G_02021	GO:0006066
BC1G_02021	GO:0055114
BC1G_02021	EC:1.1.99.1
BC1G_02036	GO:0004553	glycoside hydrolase family 5 protein
BC1G_02036	GO:0008152
BC1G_02163	GO:0009405	epl1 protein
BC1G_02163	GO:0052051
BC1G_02314	GO:0003993	phosphoglycerate mutase-like protein
BC1G_02314	GO:0016311
BC1G_02314	EC:3.1
BC1G_02314	EC:3.1.3.41
BC1G_02314	EC:3.1.3.2
BC1G_02333	GO:0019028	starch binding domain-containing protein
BC1G_02333	GO:0003824
BC1G_02333	GO:2001070
BC1G_02333	GO:0008152
BC1G_02364	GO:0004553	beta- protein
BC1G_02364	GO:0005975
BC1G_02365	GO:0004338	endo-beta- -
BC1G_02365	GO:0046557
BC1G_02365	GO:0009251
BC1G_02365	EC:3.2.1.75
BC1G_02365	EC:3.2.1.21
BC1G_02365	EC:3.2.1.58
BC1G_02365	EC:3.2.1
BC1G_02410	GO:0005576	glycoside hydrolase family 35 protein
BC1G_02410	GO:0005773
BC1G_02410	GO:0004565
BC1G_02410	GO:0000272
BC1G_02410	GO:0005988
BC1G_02410	EC:3.2.1.23
BC1G_02410	EC:3.2.1
BC1G_02480	GO:0008233	protease propeptide inhibitor
BC1G_02480	GO:0006508
BC1G_02486	GO:0016787	tannase
BC1G_02486	GO:0008152
BC1G_02487	GO:0016787	carboxylesterase protein
BC1G_02487	GO:0008152
BC1G_02492	GO:0005975	uncharacterized serine-rich protein
BC1G_02541	GO:0016787	glycosyl hydrolase family 61
BC1G_02541	GO:0008152
BC1G_02591	GO:0052692	alpha-galactosidase
BC1G_02591	GO:0005975
BC1G_02591	EC:3.2.1.22
BC1G_02591	EC:3.2.1
BC1G_02623	GO:0004556	glycoside hydrolase family 13 protein
BC1G_02623	GO:0005509
BC1G_02623	GO:2001070
BC1G_02623	GO:0016052
BC1G_02623	EC:3.2.1.1
BC1G_02623	EC:3.2.1
BC1G_02643	GO:0097159	hypothetical protein BC1G_02643
BC1G_02643	GO:1901363
BC1G_02714	GO:0016787	glycoside hydrolase family 25 protein
BC1G_02714	GO:0005975
BC1G_02731	GO:0016787	glycoside hydrolase family 55 protein
BC1G_02731	GO:0008152
BC1G_02738	GO:0005576	glycoside hydrolase family 71 protein
BC1G_02738	GO:0051118
BC1G_02738	GO:0044275
BC1G_02738	EC:3.2.1
BC1G_02738	EC:3.2.1.59
BC1G_02740	GO:0004553	glycoside hydrolase family 5 protein
BC1G_02740	GO:0005975
BC1G_02755	GO:0016491	wd40 repeat-like protein
BC1G_02755	GO:0055114
BC1G_02790	GO:0004190	concanavalin a-like lectin glucanases superfamily
BC1G_02790	GO:0006508
BC1G_02790	EC:3.4.23
BC1G_02944	GO:0004252	tripeptidyl-peptidase 1 precursor
BC1G_02944	GO:0006508
BC1G_02944	EC:3.4.21
BC1G_02965	GO:0016788	acid phosphatase
BC1G_02965	GO:0008152
BC1G_03038	GO:0005576	carbohydrate-binding module family 1 protein
BC1G_03038	GO:0004553
BC1G_03038	GO:0030248
BC1G_03038	GO:0005975
BC1G_03045	GO:0008474	palmitoyl protein thioesterase
BC1G_03045	GO:0006464
BC1G_03045	GO:0098734
BC1G_03045	EC:3.1.2.22
BC1G_03070	GO:0004190	aspartic protease
BC1G_03070	GO:0006508
BC1G_03070	EC:3.4.23
BC1G_03086	GO:0016787	tannase subunit
BC1G_03086	GO:0008152
BC1G_03097	GO:0016787	carboxylesterase
BC1G_03097	GO:0008152
BC1G_03179	GO:0004553	beta-glucosidase d
BC1G_03179	GO:0005975
BC1G_03220	GO:0016614	gmc oxidoreductase
BC1G_03220	GO:0050660
BC1G_03220	GO:0055114
BC1G_03406	GO:0004601	heme-thiolate peroxidase protein
BC1G_03406	GO:0055114
BC1G_03406	EC:1.11.1.7
BC1G_03464	GO:0005576	rhamnogalacturonase a
BC1G_03464	GO:0004650
BC1G_03464	GO:0046576
BC1G_03464	GO:0045490
BC1G_03464	GO:0071555
BC1G_03464	EC:3.2.1.15
BC1G_03557	GO:0005576	secreted protein
BC1G_03567	GO:0004565	glycoside family 35
BC1G_03567	GO:0005975
BC1G_03567	EC:3.2.1.23
BC1G_03567	EC:3.2.1
BC1G_03579	GO:0004190	aspartyl partial
BC1G_03579	GO:0006508
BC1G_03579	EC:3.4.23
BC1G_03590	GO:0005576	glycoside hydrolase family 11 enzyme
BC1G_03590	GO:0030248
BC1G_03590	GO:0031176
BC1G_03590	GO:0045493
BC1G_03590	EC:3.2.1.8
BC1G_03619	GO:0004650	rhamnogalacturonase a
BC1G_03619	GO:0046576
BC1G_03619	GO:0045490
BC1G_03619	EC:3.2.1.15
BC1G_03710	GO:0005840	serine carboxypeptidase
BC1G_03710	GO:0003735
BC1G_03710	GO:0004185
BC1G_03710	GO:0006412
BC1G_03710	GO:0006508
BC1G_03710	EC:3.4.21
BC1G_03710	EC:3.4.16
BC1G_03711	GO:0000324	carboxypeptidase y
BC1G_03711	GO:0004185
BC1G_03711	GO:0006508
BC1G_03711	GO:0046938
BC1G_03711	EC:3.4.21
BC1G_03711	EC:3.4.16
BC1G_03813	GO:0045735	oxalate decarboxylase
BC1G_03859	GO:0005576	glycoside hydrolase family 35 protein
BC1G_03859	GO:0004565
BC1G_03859	GO:0000272
BC1G_03859	EC:3.2.1.23
BC1G_03859	EC:3.2.1
BC1G_03881	GO:0016787	glycosyl hydrolase family 76
BC1G_03881	GO:0008152
BC1G_03886	GO:0016787	carboxylesterase protein
BC1G_03886	GO:0008152
BC1G_03976	GO:0016787	tap domain protein
BC1G_03976	GO:0008152
BC1G_04043	GO:0008812	gmc oxidoreductase
BC1G_04043	GO:0050660
BC1G_04043	GO:0006066
BC1G_04043	GO:0055114
BC1G_04043	EC:1.1.99.1
BC1G_04092	GO:0016491	tyrosinase protein
BC1G_04092	GO:0046872
BC1G_04092	GO:0055114
BC1G_04233	GO:0004674	aldose 1-epimerase
BC1G_04233	GO:0005524
BC1G_04233	GO:0016853
BC1G_04233	GO:0030246
BC1G_04233	GO:0005975
BC1G_04233	GO:0006468
BC1G_04233	EC:2.7.11
BC1G_04246	GO:0005576	polygalacturonase 3
BC1G_04246	GO:0004650
BC1G_04246	GO:0005975
BC1G_04246	GO:0071555
BC1G_04246	EC:3.2.1.15
BC1G_04515	GO:0005576	fungal cellulose binding domain-containing protein
BC1G_04515	GO:0004553
BC1G_04515	GO:0016788
BC1G_04515	GO:0030248
BC1G_04515	GO:0005975
BC1G_04515	GO:0006629
BC1G_04810	GO:0004252	trypsin-like serine protease
BC1G_04810	GO:0006508
BC1G_04810	EC:3.4.21
BC1G_04919	GO:0003847	paf acetylhydrolase family protein
BC1G_04919	GO:0016042
BC1G_04919	EC:3.1.1.47
BC1G_04919	EC:3.1.1.1
BC1G_04947	GO:0008496	glycoside hydrolase family 76 protein
BC1G_04947	GO:0016052
BC1G_04947	EC:3.2.1.101
BC1G_04947	EC:3.2.1.24
BC1G_04947	EC:3.2.1
BC1G_04955	GO:0004601	wsc domain-containing protein
BC1G_04955	GO:0020037
BC1G_04955	GO:0006979
BC1G_04955	GO:0055114
BC1G_04955	EC:1.11.1.7
BC1G_04994	GO:0005576	alpha-l-arabinofuranosidase b
BC1G_04994	GO:0046556
BC1G_04994	GO:0031222
BC1G_04994	GO:0045493
BC1G_04994	GO:0046373
BC1G_04994	EC:3.2.1.55
BC1G_05010	GO:0008060	stromal membrane-associated protein
BC1G_05010	GO:0008270
BC1G_05010	GO:0032312
BC1G_05010	GO:0043547
BC1G_05199	GO:0005576	carbohydrate esterase family 5 protein
BC1G_05199	GO:0050525
BC1G_05199	GO:0008152
BC1G_05199	EC:3.1.1.74
BC1G_05199	EC:3.1.1.1
BC1G_05455	GO:0005576	glycoside hydrolase family 18 protein
BC1G_05455	GO:0004553
BC1G_05455	GO:0030248
BC1G_05455	GO:0005975
BC1G_05479	GO:0008199	extracellular dioxygenase protein
BC1G_05479	GO:0016702
BC1G_05479	GO:0006725
BC1G_05479	GO:0055114
BC1G_05479	EC:1.13.11
BC1G_05488	GO:0042597	gpi anchored protein
BC1G_05488	GO:0016829
BC1G_05488	GO:0008152
BC1G_05517	GO:0008762	fad binding domain-containing protein
BC1G_05517	GO:0050660
BC1G_05517	GO:0055114
BC1G_05517	EC:1.1.1.158
BC1G_05539	GO:0016787	alpha- -glucanase
BC1G_05539	GO:0008152
BC1G_05576	GO:0008152	uncharacterized serine-rich protein
BC1G_05646	GO:0016757	neurofilament medium polypeptide protein
BC1G_05765	GO:0005576	protease s8 tripeptidyl peptidase
BC1G_05765	GO:0009277
BC1G_05765	GO:0030428
BC1G_05765	GO:0004252
BC1G_05765	GO:0045148
BC1G_05765	GO:0006508
BC1G_05765	EC:3.4.11
BC1G_05765	EC:3.4.21
BC1G_05765	EC:3.4.13
BC1G_05765	EC:3.4.11.4
BC1G_05925	GO:0004553	class iii chitinase 2
BC1G_05925	GO:0005975
BC1G_05961	GO:0005576	rhamnogalacturonase b
BC1G_05961	GO:0004650
BC1G_05961	GO:0046576
BC1G_05961	GO:0045490
BC1G_05961	GO:0071555
BC1G_05961	EC:3.2.1.15
BC1G_05976	GO:0016884	predicted protein
BC1G_05976	GO:0008152
BC1G_05986	GO:0008762	fad binding domain containing protein
BC1G_05986	GO:0050660
BC1G_05986	GO:0055114
BC1G_05986	EC:1.1.1.158
BC1G_06005	GO:0008810	glycoside hydrolase family 12 protein
BC1G_06005	GO:0000272
BC1G_06005	EC:3.2.1.4
BC1G_06035	GO:0005576	glycoside hydrolase family 7 protein
BC1G_06035	GO:0004553
BC1G_06035	GO:0030248
BC1G_06035	GO:0030245
BC1G_06237	GO:0016740	glutamyl-trna amidotransferase subunit a
BC1G_06237	GO:0016884
BC1G_06237	GO:0008152
BC1G_06274	GO:0016787	carbohydrate esterase family 5 protein
BC1G_06274	GO:0008152
BC1G_06328	GO:0016787	glycoside hydrolase family 78 protein
BC1G_06328	GO:0008152
BC1G_06334	GO:0008762	fad binding domain-containing protein
BC1G_06334	GO:0050660
BC1G_06334	GO:0055114
BC1G_06334	EC:1.1.1.158
BC1G_06369	GO:0005576	cutinase
BC1G_06369	GO:0004806
BC1G_06369	GO:0050525
BC1G_06369	GO:0019433
BC1G_06369	EC:3.1.1.74
BC1G_06369	EC:3.1.1
BC1G_06369	EC:3.1.1.1
BC1G_06369	EC:3.1.1.3
BC1G_06380	GO:0016810	carbon-nitrogen hydrolase
BC1G_06380	GO:0006807
BC1G_06463	GO:0044464	alpha-
BC1G_06463	GO:0004556
BC1G_06463	GO:0005509
BC1G_06463	GO:0016052
BC1G_06463	EC:3.2.1.1
BC1G_06463	EC:3.2.1
BC1G_06509	GO:0008061	chitin deacetylase
BC1G_06509	GO:0008168
BC1G_06509	GO:0016810
BC1G_06509	GO:0005975
BC1G_06509	GO:0032259
BC1G_06546	GO:0052692	alpha-galactosidase
BC1G_06546	GO:0005975
BC1G_06546	EC:3.2.1.22
BC1G_06546	EC:3.2.1
BC1G_06836	GO:0004252	serine protease
BC1G_06836	GO:0006508
BC1G_06836	EC:3.4.21
BC1G_06840	GO:0005618	carbohydrate esterase family 8 protein
BC1G_06840	GO:0016798
BC1G_06840	GO:0030599
BC1G_06840	GO:0045330
BC1G_06840	GO:0008152
BC1G_06840	GO:0042545
BC1G_06840	EC:3.1.1.11
BC1G_06840	EC:3.1.1.1
BC1G_06893	GO:0005506	cytochrome p450
BC1G_06893	GO:0016712
BC1G_06893	GO:0020037
BC1G_06893	GO:0055114
BC1G_06893	EC:1.14.14
BC1G_07052	GO:0005576	polysaccharide lyase family 3 protein
BC1G_07052	GO:0030570
BC1G_07052	GO:0008152
BC1G_07052	EC:4.2.2.2
BC1G_07058	GO:0016787	alpha- -glucanase
BC1G_07058	GO:0008152
BC1G_07101	GO:0016787	glycoside hydrolase family 78 protein
BC1G_07101	GO:0008152
BC1G_07110	GO:0004553	glycoside hydrolase family 3 protein
BC1G_07110	GO:0030245
BC1G_07149	GO:0004185	carboxypeptidase d
BC1G_07149	GO:0006508
BC1G_07149	EC:3.4.21
BC1G_07149	EC:3.4.16
BC1G_07160	GO:0008081	plc-like phosphodiesterase
BC1G_07160	GO:0006629
BC1G_07160	EC:3.1
BC1G_07215	GO:0004563	glycoside hydrolase family 20 protein
BC1G_07215	GO:0005975
BC1G_07215	EC:3.2.1.52
BC1G_07215	EC:3.2.1
BC1G_07275	GO:0008236	peptidase s41 family protein
BC1G_07275	GO:0006508
BC1G_07319	GO:0016787	glycoside hydrolase family 55 protein
BC1G_07319	GO:0016829
BC1G_07319	GO:0008152
BC1G_07482	GO:0008762	fad binding domain-containing protein
BC1G_07482	GO:0050660
BC1G_07482	GO:0055114
BC1G_07482	EC:1.1.1.158
BC1G_07483	GO:0004806	secretory protein
BC1G_07483	GO:0016042
BC1G_07483	EC:3.1.1
BC1G_07483	EC:3.1.1.1
BC1G_07483	EC:3.1.1.3
BC1G_07521	GO:0004190	aspartate protease
BC1G_07521	GO:0006508
BC1G_07521	EC:3.4.23
BC1G_07527	GO:0005576	pectin lyase e
BC1G_07527	GO:0047490
BC1G_07527	GO:0045490
BC1G_07527	GO:0071555
BC1G_07527	EC:4.2.2.10
BC1G_07558	GO:0016757	glycosyltransferase family 32 protein
BC1G_07558	GO:0008152
BC1G_07620	GO:0003840	gamma-glutamyltranspeptidase protein
BC1G_07620	GO:0016787
BC1G_07620	GO:0006749
BC1G_07620	EC:2.3.2.2
BC1G_07622	GO:0008422	beta-glucosidase m
BC1G_07622	GO:0030245
BC1G_07622	EC:3.2.1.21
BC1G_07622	EC:3.2.1
BC1G_07637	GO:0004806	alpha beta-hydrolase
BC1G_07637	GO:0008152
BC1G_07637	EC:3.1.1
BC1G_07637	EC:3.1.1.1
BC1G_07637	EC:3.1.1.3
BC1G_07653	GO:0008810	glycoside hydrolase family 61 protein
BC1G_07653	GO:0009251
BC1G_07653	EC:3.2.1.4
BC1G_07658	GO:0004553	glycoside hydrolase family 61 protein
BC1G_07658	GO:0005975
BC1G_07770	GO:0000324	aminopeptidase y
BC1G_07770	GO:0004177
BC1G_07770	GO:0046872
BC1G_07770	GO:0006508
BC1G_07770	EC:3.4.11
BC1G_07794	GO:0005576	fad nad -binding protein
BC1G_07794	GO:0004553
BC1G_07794	GO:0016614
BC1G_07794	GO:0030248
BC1G_07794	GO:0050660
BC1G_07794	GO:0005975
BC1G_07794	GO:0055114
BC1G_07820	GO:0009277	alpha-amylase a type-1 2
BC1G_07820	GO:0030287
BC1G_07820	GO:0030428
BC1G_07820	GO:0031521
BC1G_07820	GO:0032163
BC1G_07820	GO:0004556
BC1G_07820	GO:0005509
BC1G_07820	GO:0016052
BC1G_07820	EC:3.2.1.1
BC1G_07820	EC:3.2.1
BC1G_07822	GO:0005576	glycoside hydrolase family 5 protein
BC1G_07822	GO:0004553
BC1G_07822	GO:0030248
BC1G_07822	GO:0046872
BC1G_07822	GO:0005975
BC1G_07854	GO:0004553	chitinase 3
BC1G_07854	GO:0005975
BC1G_07899	GO:0016787	carbohydrate esterase family 5 protein
BC1G_07899	GO:0008152
BC1G_07945	GO:0004553	glycoside hydrolase family 16 protein
BC1G_07945	GO:0005975
BC1G_07974	GO:0016787	esterase lipase
BC1G_07974	GO:0008152
BC1G_08033	GO:0005576	polygalacturonase partial
BC1G_08033	GO:0004650
BC1G_08033	GO:0016829
BC1G_08033	GO:0005975
BC1G_08033	GO:0071555
BC1G_08033	EC:3.2.1.15
BC1G_08063	GO:0005840	ribosomal protein s17
BC1G_08101	GO:0016787	alpha beta superfamily
BC1G_08101	GO:0008152
BC1G_08253	GO:0050318	tannase subunit
BC1G_08253	GO:0008152
BC1G_08253	EC:3.1.1.20
BC1G_08253	EC:3.1.1.1
BC1G_08280	GO:0005576	extracellular scp domain protein
BC1G_08308	GO:0005975	uncharacterized serine-rich protein
BC1G_08314	GO:0005576	cutinase
BC1G_08314	GO:0050525
BC1G_08314	GO:0008152
BC1G_08314	EC:3.1.1.74
BC1G_08314	EC:3.1.1.1
BC1G_08354	GO:0005576	aorsin
BC1G_08354	GO:0009277
BC1G_08354	GO:0030428
BC1G_08354	GO:0004252
BC1G_08354	GO:0045148
BC1G_08354	GO:0006508
BC1G_08354	EC:3.4.11
BC1G_08354	EC:3.4.21
BC1G_08354	EC:3.4.13
BC1G_08354	EC:3.4.11.4
BC1G_08370	GO:0009277	glycoside hydrolase family 17 protein
BC1G_08370	GO:0042124
BC1G_08370	GO:0042973
BC1G_08370	GO:0005975
BC1G_08370	EC:3.2.1.21
BC1G_08370	EC:3.2.1.39
BC1G_08370	EC:3.2.1
BC1G_08372	GO:0046556	glycoside hydrolase family 51 protein
BC1G_08372	GO:0046373
BC1G_08372	EC:3.2.1.55
BC1G_08393	GO:0004190	pepsinogen c protein
BC1G_08393	GO:0006508
BC1G_08393	EC:3.4.23
BC1G_08574	GO:0016829	polysaccharide lyase family 7 protein
BC1G_08574	GO:0008152
BC1G_08615	GO:0016787	glycoside hydrolase family 43 protein
BC1G_08615	GO:0008152
BC1G_08658	GO:0004181	zinc carboxypeptidase
BC1G_08658	GO:0008270
BC1G_08658	GO:0006508
BC1G_08658	EC:3.4.17
BC1G_08692	GO:0008061	glycoside hydrolase family 61 protein
BC1G_08692	GO:0016798
BC1G_08692	GO:0008152
BC1G_08749	GO:0016021	predicted protein
BC1G_08751	GO:0016021	predicted protein
BC1G_08755	GO:0004339	glucoamylase p
BC1G_08755	GO:2001070
BC1G_08755	GO:0000272
BC1G_08755	EC:3.2.1.3
BC1G_08755	EC:3.2.1
BC1G_08757	GO:0016787	gluconolactonase precursor
BC1G_08757	GO:0008152
BC1G_08801	GO:0016798	six-hairpin glycosidase
BC1G_08801	GO:0008152
BC1G_08831	GO:0004185	serine carboxypeptidase
BC1G_08831	GO:0006508
BC1G_08831	EC:3.4.21
BC1G_08831	EC:3.4.16
BC1G_08924	GO:0004553	glycoside hydrolase family 16 protein
BC1G_08924	GO:0005975
BC1G_08975	GO:0004560	glycoside hydrolase family 95 protein
BC1G_08975	GO:0008152
BC1G_08975	EC:3.2.1.51
BC1G_08975	EC:3.2.1
BC1G_08989	GO:0005576	glycosyl hydrolase family cellulase
BC1G_08989	GO:0016162
BC1G_08989	GO:0030248
BC1G_08989	GO:0030245
BC1G_08989	EC:3.2.1.91
BC1G_08990	GO:0005576	glycoside hydrolase family 5 protein
BC1G_08990	GO:0008810
BC1G_08990	GO:0030248
BC1G_08990	GO:0030245
BC1G_08990	EC:3.2.1.4
BC1G_09000	GO:0005576	pectate lyase b
BC1G_09000	GO:0016829
BC1G_09000	GO:0000272
BC1G_09013	GO:0016787	lipase 4
BC1G_09013	GO:0008152
BC1G_09029	GO:0016813	arginase family protein
BC1G_09029	GO:0046872
BC1G_09029	GO:0008152
BC1G_09121	GO:0016787	carboxylesterase family protein
BC1G_09121	GO:0008152
BC1G_09146	GO:0016798	carbohydrate esterase family 4 protein
BC1G_09146	GO:0016810
BC1G_09146	GO:0045493
BC1G_09180	GO:0005576	deuterolysin metalloprotease
BC1G_09180	GO:0004222
BC1G_09180	GO:0046872
BC1G_09180	GO:0006508
BC1G_09180	EC:3.4.24
BC1G_09190	GO:0008762	fad binding domain protein
BC1G_09190	GO:0050660
BC1G_09190	GO:0055114
BC1G_09190	EC:1.1.1.158
BC1G_09210	GO:0008810	endoglucanase 1
BC1G_09210	GO:0030245
BC1G_09210	EC:3.2.1.4
BC1G_09240	GO:0045735	oxalate decarboxylase
BC1G_09240	GO:0046564
BC1G_09240	GO:0033609
BC1G_09240	EC:4.1.1.2
BC1G_09364	GO:0004601	oxidase-like protein
BC1G_09364	GO:0055114
BC1G_09364	EC:1.11.1.7
BC1G_09391	GO:0016787	carboxylesterase protein
BC1G_09495	GO:0016787	feruloyl esterase b
BC1G_09495	GO:0008152
BC1G_09564	GO:0004252	serine protein
BC1G_09564	GO:0006508
BC1G_09564	EC:3.4.21
BC1G_09565	GO:0004252	serine protein
BC1G_09565	GO:0006508
BC1G_09565	EC:3.4.21
BC1G_09613	GO:0005789	dolichyl-diphosphooligosaccharide--protein glycosyltransferase 48 kda subunit
BC1G_09613	GO:0016021
BC1G_09613	GO:0004579
BC1G_09613	GO:0018279
BC1G_09613	EC:2.4.1.119
BC1G_09613	EC:2.4.1
BC1G_09644	GO:0016787	triacylglycerol lipase
BC1G_09644	GO:0008152
BC1G_09657	GO:0008237	predicted protein
BC1G_09657	GO:0006508
BC1G_09694	GO:0016787	triacylglycerol lipase
BC1G_09694	GO:0008152
BC1G_09791	GO:0004177	prolyl aminopeptidase (secreted protein)
BC1G_09791	GO:0004806
BC1G_09791	GO:0006508
BC1G_09791	GO:0016042
BC1G_09791	EC:3.4.11
BC1G_09791	EC:3.1.1
BC1G_09791	EC:3.1.1.1
BC1G_09791	EC:3.1.1.3
BC1G_09829	GO:0004553	endo- -beta-glucanase
BC1G_09829	GO:0005975
BC1G_09883	GO:0016787	alpha beta-hydrolase
BC1G_09883	GO:0008152
BC1G_09991	GO:0004553	endo- -beta-glucanase
BC1G_09991	GO:0005975
BC1G_09997	GO:0016884	amidase family protein
BC1G_09997	GO:0008152
BC1G_10075	GO:0003824	o-pyrocatechuate decarboxylase
BC1G_10075	GO:0008152
BC1G_10091	GO:0052689	chlorogenic acid esterase precursor
BC1G_10091	EC:3.1.1.1
BC1G_10095	GO:0005618	protein rds1 protein
BC1G_10095	GO:0005199
BC1G_10221	GO:0004553	beta-glucosidase 1 precursor
BC1G_10221	GO:0030245
BC1G_10229	GO:0005576	pectate lyase
BC1G_10229	GO:0030570
BC1G_10229	GO:0008152
BC1G_10229	EC:4.2.2.2
BC1G_10231	GO:0004553	beta- -glucosidase
BC1G_10231	GO:0030245
BC1G_10247	GO:0004553	glycoside hydrolase family 32 protein
BC1G_10247	GO:0005975
BC1G_10322	GO:0005576	family 43 glycoside hydrolase
BC1G_10322	GO:0046558
BC1G_10322	GO:0031222
BC1G_10322	GO:2000895
BC1G_10322	EC:3.2.1.99
BC1G_10329	GO:0005576	carbohydrate-binding module family 20 protein
BC1G_10329	GO:0005507
BC1G_10329	GO:0030246
BC1G_10329	GO:0052716
BC1G_10329	GO:0046274
BC1G_10329	GO:0055114
BC1G_10329	EC:1.10.3
BC1G_10329	EC:1.10.3.2
BC1G_10341	GO:0008810	mannan endo- -beta-mannosidase
BC1G_10341	GO:0016985
BC1G_10341	GO:0030246
BC1G_10341	GO:0006080
BC1G_10341	EC:3.2.1.25
BC1G_10341	EC:3.2.1.78
BC1G_10341	EC:3.2.1
BC1G_10341	EC:3.2.1.4
BC1G_10381	GO:0008061	carbohydrate-binding module family 18 protein
BC1G_10397	GO:0008081	plc-like phosphodiesterase
BC1G_10397	GO:0006629
BC1G_10397	EC:3.1
BC1G_10475	GO:0016787	alpha beta-hydrolase protein
BC1G_10475	GO:0008152
BC1G_10486	GO:0003824	glutaminase
BC1G_10486	GO:0008152
BC1G_10768	GO:0008199	gpi anchored dioxygenase
BC1G_10768	GO:0016702
BC1G_10768	GO:0006725
BC1G_10768	GO:0055114
BC1G_10768	EC:1.13.11
BC1G_10788	GO:0008812	glucose oxidase
BC1G_10788	GO:0050660
BC1G_10788	GO:0006066
BC1G_10788	GO:0055114
BC1G_10788	EC:1.1.99.1
BC1G_10789	GO:0005576	glycoside hydrolase family 62 protein
BC1G_10789	GO:0030248
BC1G_10789	GO:0046556
BC1G_10789	GO:0045493
BC1G_10789	GO:0046373
BC1G_10789	EC:3.2.1.55
BC1G_10791	GO:0008237	metalloproteases catalytic
BC1G_10791	GO:0006508
BC1G_10797	GO:0004553	xylosidase : arabinofuranosidase
BC1G_10797	GO:0005975
BC1G_10827	GO:0016787	glutaminase
BC1G_10827	GO:0008152
BC1G_10880	GO:0005576	cellobiohydrolase precursor
BC1G_10880	GO:0008810
BC1G_10880	GO:0016162
BC1G_10880	GO:0016829
BC1G_10880	GO:0030248
BC1G_10880	GO:0030245
BC1G_10880	EC:3.2.1.91
BC1G_10880	EC:3.2.1.4
BC1G_11115	GO:0004553	glycoside hydrolase family 31 protein
BC1G_11115	GO:0030246
BC1G_11115	GO:0005975
BC1G_11134	GO:0016787	acid phosphatase
BC1G_11134	GO:0008152
BC1G_11143	GO:0005576	polygalacturonase partial
BC1G_11143	GO:0004650
BC1G_11143	GO:0005975
BC1G_11143	GO:0071555
BC1G_11143	EC:3.2.1.15
BC1G_11144	GO:0005618	carbohydrate esterase family 8 protein
BC1G_11144	GO:0016829
BC1G_11144	GO:0030599
BC1G_11144	GO:0045330
BC1G_11144	GO:0008152
BC1G_11144	GO:0042545
BC1G_11144	EC:3.1.1.11
BC1G_11144	EC:3.1.1.1
BC1G_11266	GO:0005507	extracellular dihydrogeodin oxidase laccase
BC1G_11266	GO:0016491
BC1G_11266	GO:0055114
BC1G_11288	GO:0016787	nucleoside hydrolase
BC1G_11288	GO:0008152
BC1G_11306	GO:0003993	histidine acid phosphatase
BC1G_11306	GO:0016311
BC1G_11306	EC:3.1
BC1G_11306	EC:3.1.3.41
BC1G_11306	EC:3.1.3.2
BC1G_11407	GO:0004568	glycoside hydrolase family 18 protein
BC1G_11407	GO:0005975
BC1G_11407	GO:0006032
BC1G_11407	EC:3.2.1.14
BC1G_11439	GO:0004553	beta-glucosidase d
BC1G_11439	GO:0005975
BC1G_11556	GO:0008762	fad binding domain protein
BC1G_11556	GO:0050660
BC1G_11556	GO:0055114
BC1G_11556	EC:1.1.1.158
BC1G_11690	GO:0005576	pectin lyase a precursor protein
BC1G_11690	GO:0016829
BC1G_11690	GO:0000272
BC1G_11698	GO:0003723	ribonuclease rh-like protein
BC1G_11698	GO:0033897
BC1G_11698	GO:0090502
BC1G_11698	EC:3.1.31
BC1G_11698	EC:3.1
BC1G_11698	EC:3.1.27
BC1G_11698	EC:3.1.27.1
BC1G_11751	GO:0003993	histidine acid phosphatase
BC1G_11751	GO:0016311
BC1G_11751	EC:3.1
BC1G_11751	EC:3.1.3.41
BC1G_11751	EC:3.1.3.2
BC1G_11826	GO:0008061	carbohydrate-binding module family 18 protein
BC1G_11835	GO:0003993	histidine acid phosphatase
BC1G_11835	GO:0016311
BC1G_11835	EC:3.1
BC1G_11835	EC:3.1.3.41
BC1G_11835	EC:3.1.3.2
BC1G_11891	GO:0016787	glycosyl hydrolase
BC1G_11891	GO:0008152
BC1G_11898	GO:0004553	glycoside hydrolase family 17 protein
BC1G_11898	GO:0005975
BC1G_11909	GO:0005576	extracellular exo-polygalacturonase
BC1G_11909	GO:0004650
BC1G_11909	GO:0005975
BC1G_11909	GO:0071555
BC1G_11909	EC:3.2.1.15
BC1G_12117	GO:0008812	gmc oxidoreductase
BC1G_12117	GO:0050660
BC1G_12117	GO:0006066
BC1G_12117	GO:0055114
BC1G_12117	EC:1.1.99.1
BC1G_12131	GO:0016787	glycoside hydrolase family 65 protein
BC1G_12131	GO:0030246
BC1G_12131	GO:0005975
BC1G_12132	GO:0016787	glycoside hydrolase family 65 protein
BC1G_12132	GO:0030246
BC1G_12132	GO:0005975
BC1G_12138	GO:0046556	glycoside superfamily
BC1G_12138	GO:0046373
BC1G_12138	EC:3.2.1.55
BC1G_12139	GO:0016787	triacylglycerol lipase
BC1G_12139	GO:0008152
BC1G_12145	GO:0007155	galactose oxidase precursor
BC1G_12157	GO:0016813	agmatinase 1
BC1G_12157	GO:0046872
BC1G_12157	GO:0008152
BC1G_12171	GO:0005840	ribosomal protein s17
BC1G_12171	GO:0016758
BC1G_12171	GO:0016787
BC1G_12171	GO:0044238
BC1G_12171	GO:0071704
BC1G_12174	GO:0042597	gpi anchored protein
BC1G_12174	GO:0016829
BC1G_12174	GO:0008152
BC1G_12249	GO:0005615	carboxylesterase
BC1G_12249	GO:0004435
BC1G_12249	GO:0052689
BC1G_12249	GO:0006629
BC1G_12249	GO:0035556
BC1G_12249	EC:3.1
BC1G_12249	EC:3.1.4.11
BC1G_12249	EC:3.1.1
BC1G_12249	EC:3.1.1.1
BC1G_12343	GO:0005618	subtilisin-like protease protein
BC1G_12343	GO:0016020
BC1G_12343	GO:0004252
BC1G_12343	GO:0006508
BC1G_12343	EC:3.4.21
BC1G_12379	GO:0005576	acetyl xylan esterase
BC1G_12379	GO:0004553
BC1G_12379	GO:0030248
BC1G_12379	GO:0005975
BC1G_12449	GO:0004601	aromatic peroxygenase
BC1G_12449	GO:0055114
BC1G_12449	EC:1.11.1.7
BC1G_12478	GO:0004553	glycoside hydrolase family 5 protein
BC1G_12478	GO:0005975
BC1G_12517	GO:0005576	pectin lyase
BC1G_12517	GO:0047490
BC1G_12517	GO:0045490
BC1G_12517	GO:0071555
BC1G_12517	EC:4.2.2.10
BC1G_12522	GO:0004767	ser thr protein phosphatase family protein
BC1G_12522	GO:0016798
BC1G_12522	GO:0006685
BC1G_12522	EC:3.1
BC1G_12522	EC:3.1.4.12
BC1G_12522	EC:3.1.1
BC1G_12525	GO:0004601	oxidase-like protein
BC1G_12525	GO:0055114
BC1G_12525	EC:1.11.1.7
BC1G_12537	GO:0008762	fad binding domain protein
BC1G_12537	GO:0050660
BC1G_12537	GO:0055114
BC1G_12537	EC:1.1.1.158
BC1G_12680	GO:0005488	carbohydrate esterase family 16 protein
BC1G_12680	GO:0016788
BC1G_12680	GO:0006629
BC1G_12776	GO:0004252	tripeptidyl peptidase protein
BC1G_12776	GO:0006508
BC1G_12776	EC:3.4.21
BC1G_12793	GO:0003676	ibr domain-containing protein
BC1G_12793	GO:0008270
BC1G_12859	GO:0004553	glycoside hydrolase family 31 protein
BC1G_12859	GO:0030246
BC1G_12859	GO:0005975
BC1G_12914	GO:0004620	lysophospholipase
BC1G_12914	GO:0009395
BC1G_12914	EC:3.1.1
BC1G_12931	GO:0042742	barwin-like endoglucanase
BC1G_12931	GO:0050832
BC1G_12932	GO:0016787	tannase subunit
BC1G_12932	GO:0008152
BC1G_13123	GO:0016491	gdsl-like lipase acylhydrolase protein
BC1G_13123	GO:0016787
BC1G_13123	GO:0046872
BC1G_13123	GO:0051537
BC1G_13123	GO:0055114
BC1G_13137	GO:0005576	murein transglycosylase
BC1G_13137	GO:0004650
BC1G_13137	GO:0045490
BC1G_13137	GO:0071555
BC1G_13137	EC:3.2.1.15
BC1G_13139	GO:0005576	carbohydrate-binding module family 1 protein
BC1G_13139	GO:0004553
BC1G_13139	GO:0030248
BC1G_13139	GO:0005975
BC1G_13153	GO:0016787	glycoside hydrolase family 115 protein
BC1G_13153	GO:0008152
BC1G_13367	GO:0005576	polygalacturonase 2
BC1G_13367	GO:0004650
BC1G_13367	GO:0005975
BC1G_13367	GO:0071555
BC1G_13367	EC:3.2.1.15
BC1G_13386	GO:0008812	gmc oxidoreductase
BC1G_13386	GO:0050660
BC1G_13386	GO:0006066
BC1G_13386	GO:0055114
BC1G_13386	EC:1.1.99.1
BC1G_13445	GO:0003824	cupredoxin (secreted protein)
BC1G_13445	GO:0005488
BC1G_13543	GO:0016491	hypothetical protein BC1G_13543
BC1G_13543	GO:0015979
BC1G_13543	GO:0015995
BC1G_13543	GO:0016117
BC1G_13543	GO:0055114
BC1G_13645	GO:0031176	glycoside hydrolase family 11 protein
BC1G_13645	GO:0045493
BC1G_13645	EC:3.2.1.8
BC1G_13659	GO:0016787	alpha- -glucanase
BC1G_13659	GO:0008152
BC1G_13714	GO:0016787	carboxylesterase protein
BC1G_13714	GO:0008152
BC1G_13815	GO:0016787	tannase subunit protein
BC1G_13815	GO:0008152
BC1G_13855	GO:0004553	glycoside hydrolase family 5 protein
BC1G_13855	GO:0005975
BC1G_13862	GO:0008810	glycoside hydrolase family 45 protein
BC1G_13862	GO:0005975
BC1G_13862	EC:3.2.1.4
BC1G_13903	GO:0004065	arylsulfatase
BC1G_13903	GO:0018958
BC1G_13903	EC:3.1.6.1
BC1G_13938	GO:0016787	bnr asp-box repeat domain protein
BC1G_13938	GO:0008152
BC1G_13960	GO:0016787	acetylcholinesterase precursor
BC1G_13960	GO:0008152
BC1G_13970	GO:0005576	pectin lyase-like protein
BC1G_13970	GO:0004650
BC1G_13970	GO:0016829
BC1G_13970	GO:0005975
BC1G_13970	GO:0071555
BC1G_13970	EC:3.2.1.15
BC1G_14009	GO:0016788	sgnh hydrolase
BC1G_14009	GO:0006629
BC1G_14012	GO:0008812	choline dehydrogenase
BC1G_14012	GO:0050660
BC1G_14012	GO:0006066
BC1G_14012	GO:0055114
BC1G_14012	EC:1.1.99.1
BC1G_14030	GO:0005886	glycoside hydrolase family 72 protein
BC1G_14030	GO:0031225
BC1G_14030	GO:0016740
BC1G_14030	GO:0016798
BC1G_14030	GO:0005975
BC1G_14101	GO:0004181	carboxypeptidase a
BC1G_14101	GO:0008270
BC1G_14101	GO:0006508
BC1G_14101	EC:3.4.17
BC1G_14153	GO:0004190	acid protease partial
BC1G_14153	GO:0006508
BC1G_14153	EC:3.4.23
BC1G_14164	GO:0005576	beta-d-glucoside glucohydrolase
BC1G_14164	GO:0008422
BC1G_14164	GO:0030248
BC1G_14164	GO:0005975
BC1G_14164	EC:3.2.1.21
BC1G_14164	EC:3.2.1
BC1G_14177	GO:0008762	fad binding domain-containing protein
BC1G_14177	GO:0050660
BC1G_14177	GO:0055114
BC1G_14177	EC:1.1.1.158
BC1G_14317	GO:0003723	ribonuclease t2
BC1G_14317	GO:0033897
BC1G_14317	GO:0090502
BC1G_14317	EC:3.1.31
BC1G_14317	EC:3.1
BC1G_14317	EC:3.1.27
BC1G_14317	EC:3.1.27.1
BC1G_14330	GO:0016614	cellobiose dehydrogenase
BC1G_14330	GO:0050660
BC1G_14330	GO:0055114
BC1G_14349	GO:0005507	multicopper oxidase
BC1G_14349	GO:0016491
BC1G_14349	GO:0055114
BC1G_14398	GO:0016641	d-amino-acid oxidase
BC1G_14398	GO:0055114
BC1G_14415	GO:0016787	carbohydrate esterase family 5 protein
BC1G_14415	GO:0008152
BC1G_14481	GO:0052051	candidate effector 5 protein
BC1G_14570	GO:0008081	plc-like phosphodiesterase
BC1G_14570	GO:0006629
BC1G_14570	EC:3.1
BC1G_14591	GO:0004185	carboxypeptidase s1
BC1G_14591	GO:0006508
BC1G_14591	EC:3.4.21
BC1G_14591	EC:3.4.16
BC1G_14698	GO:0005576	carbohydrate-binding module family 1 protein
BC1G_14698	GO:0004553
BC1G_14698	GO:0030248
BC1G_14698	GO:0005975
BC1G_14702	GO:0004553	glycoside hydrolase family 7 protein
BC1G_14702	GO:0030245
BC1G_14714	GO:0005635	l-asparaginase
BC1G_14714	GO:0005783
BC1G_14714	GO:0004067
BC1G_14714	GO:0006528
BC1G_14714	EC:3.5.1.1
BC1G_14944	GO:0005576	glycoside hydrolase family 18 protein
BC1G_14944	GO:0004553
BC1G_14944	GO:0030248
BC1G_14944	GO:0005975
BC1G_14974	GO:0004601	l-ascorbate oxidase
BC1G_14974	GO:0020037
BC1G_14974	GO:0006979
BC1G_14974	GO:0055114
BC1G_14974	EC:1.11.1.7
BC1G_14990	GO:0016491	di-copper centre-containing
BC1G_14990	GO:0046872
BC1G_14990	GO:0055114
BC1G_15017	GO:0016787	glycoside hydrolase family 61 protein
BC1G_15017	GO:0008152
BC1G_15118	GO:0004650	glycoside hydrolase family 28 protein
BC1G_15118	GO:0005975
BC1G_15118	EC:3.2.1.15
BC1G_15341	GO:0016788	lysophospholipase a
BC1G_15341	GO:0032266
BC1G_15341	GO:0000724
BC1G_15341	GO:0000910
BC1G_15341	GO:0006629
BC1G_15643	GO:0003676	nuclease s1 protein
BC1G_15643	GO:0004519
BC1G_15643	GO:0006308
BC1G_15643	GO:0090305
BC1G_15643	EC:3.1
BC1G_15663	GO:0008236	oligopeptidase family protein
BC1G_15663	GO:0006508
BC1G_16127	GO:0016787	carboxylesterase type b
BC1G_16127	GO:0008152
BC1G_16238	GO:0004553	glycoside hydrolase family 5 protein
BC1G_16238	GO:0005975
BC1G_16413	GO:0016788	carbohydrate esterase family 16 protein
BC1G_16413	GO:0032266
BC1G_16413	GO:0000724
BC1G_16413	GO:0000910
BC1G_16413	GO:0006629

## Sheet: Table 4
PFAM description	Pfam domain (0TM)	No. of domain in refined Bc secretome
Carboxylesterase, type B	PF00135	18
glycoside hydrolase family 28	PF00295	17
glucose-methanol-choline oxidoreductase family	PF00732	12
glucose-methanol-choline oxidoreductase family	PF05199	12
glycoside hydrolase family 3	PF01915	9
glycoside hydrolase family 3	PF00933	8
Tannase and feruloyl esterase	PF07519	8
Pro-kumamolisin, activation domain	PF09286	8
Fibronectin type III-like domain	PF14310	8
Peptidase A1	PF00026	7
Peptidase S10, serine carboxypeptidase	PF00450	7
cutinase	PF01083	7
FAD binding site	PF01565	7
Glycoside hydrolase family 61	PF03443	7
glycoside hydrolase family 5	PF00150	6
carbohydrate-binding module	PF00734	6
Alpha/beta hydrolase fold	PF07859	6
Pectate lyase	PF00544	5
Peroxidase, family 2	PF01328	5
phosphatase	PF00328	4
Glycoside hydrolase family 71	PF03659	4
Berberine and berberine like	PF08031	4
Protein of unknown function (DUF3129)	PF11327	4
Alpha-Amylase	PF00128	3
Tyrosinase	PF00264	3
multicopper oxidases	PF00394	3
Glycoside hydrolase family 18	PF00704	3
Glycoside hydrolase family 16	PF00722	3
glycoside hydrolase family 7	PF00840	3
Pectinesterase	PF01095	3
glycoside hydrolase family 35	PF01301	3
Amidase	PF01425	3
WSC domain	PF01822	3
multicopper oxidases	PF07731	3
multicopper oxidases	PF07732	3
DUF	PF09260	3
Glycosyl hydrolase catalytic core	PF11790	3
Hydrophobic surface binding protein A	PF12296	3
Pectate_lyase_3	PF12708	3
Ferritin-like domain	PF13668	3
Subtilase	PF00082	2
Haem peroxidase	PF00141	2
CAP protein family (cysteine-rich secretory proteins, antigen 5, and pathogenesis-related 1 proteins (CAP)	PF00188	2
cupin superfamily	PF00190	2
Zinc carboxypeptidase	PF00246	2
Glycoside hydrolase family 10	PF00331	2
Glycoside hydrolase family 17	PF00332	2
Ribonuclease T2 family	PF00445	2
Glycoside hydrolase family 11	PF00457	2
Ureohydrolase	PF00491	2
GDSL-like Lipase/Acylhydrolase	PF00657	2
Carbohydrate-binding module	PF00686	2
Glycoside hydrolase family 31	PF01055	2
Polysaccharide deacetylase	PF01522	2
Glycoside hydrolase family 12	PF01670	2
Lysophospholipase	PF01735	2
Peptidase A4 family	PF01828	2
Glycoside hydrolase family 27	PF02065	2
Major royal jelly protein	PF03022	2
Pectate lyase	PF03211	2
Glycoside hydrolase family 65	PF03636	2
Glycoside hydrolase family 76	PF03663	2
SUN (Sad1p, UNC-84) domains	PF03856	2
Glycoside hydrolase family 43	PF04616	2
Poly(beta-D-mannuronate) lyase	PF05426	2
Serine carboxypeptidase S28	PF05577	2
Glycoside hydrolase family 78	PF05592	2
Necrosis inducing protein (NPP1)	PF05630	2
Alpha-L-arabinofuranosidase C-terminus	PF06964	2
Cerato-platanin	PF07249	2
cupin superfamily	PF07883	2
Domain of unknown function (DUF1929)	PF09118	2
DUF1996	PF09362	2
Beta-galactosidase, domain 2	PF10435	2
Protein of unknown function (DUF3455)	PF11937	2
Spherulation-specific family 4	PF12138	2
Alpha/beta hydrolase fold	PF12697	2
Beta-galactosidase, domain 3	PF13363	2
Beta-galactosidase jelly roll domain	PF13364	2
Cytochrome P450	PF00067	1
Trypsin	PF00089	1
carbohydrate-binding module (CBM)	PF00187	1
Aldo-keto reductase	PF00248	1
Glycoside hydrolase family 32	PF00251	1
Phosphatase	PF00300	1
Prolyl oligopeptidase family	PF00326	1
Phosphoinositide phospholipase C	PF00388	1
Asparaginase	PF00710	1
Glycoside hydrolase family 15	PF00723	1
Glycoside hydrolase family 20	PF00728	1
Discoidin domain	PF00754	1
Dioxygenase	PF00775	1
Carbon-nitrogen hydrolase	PF00795	1
Sulfatase	PF00884	1
Dipeptidyl-peptidase IV family	PF00930	1
Gamma-glutamyl transpeptidase	PF01019	1
Inosine-uridine preferring nucleoside hydrolase	PF01156	1
Phosphatidylethanolamine-binding protein	PF01161	1
Aldose 1-epimerase	PF01263	1
FAD dependent oxidoreductase family	PF01266	1
Glycoside hydrolase family 6	PF01341	1
Putative GTPase activating protein for Arf	PF01412	1
Glycoside hydrolase family 47	PF01532	1
Survival protein SurE	PF01975	1
Glycoside hydrolase family 45	PF02015	1
Palmitoyl protein thioesterase	PF02089	1
Deuterolysin metalloprotease (M35) family	PF02102	1
Glycoside hydrolase family 26	PF02156	1
MD-2-related lipid-recognition (ML) domain	PF02221	1
PA (Protease associated) domain	PF02225	1
S1/P1 Nuclease	PF02265	1
Carbohydrate-binding module	PF03067	1
Glycoside hydrolase family 72	PF03198	1
Rare lipoprotein A (RlpA)-like double-psi beta-barrel	PF03330	1
Oligosaccharyltransferase 48 kDa subunit beta	PF03345	1
Platelet-activating factor acetylhydrolase, isoform II	PF03403	1
DUF (CBM_X2)	PF03442	1
Secretory lipase	PF03583	1
glycoside hydrolase family 65	PF03632	1
Glycoside hydrolase family 62	PF03664	1
Domain of unknown function (DUF383)	PF04063	1
Phosphoesterase family	PF04185	1
Peptidase family M28	PF04389	1
Glycosyltransferase sugar-binding region containing DXD motif	PF04488	1
Amidohydrolase	PF04909	1
Alpha-L-arabinofuranosidase B (ABFB)	PF05270	1
Carboxypeptidase Y pro-peptide	PF05388	1
Acetyl xylan esterase (AXE1)	PF05448	1
Protease inhibitor	PF05922	1
Fn3-like domain (DUF1034)	PF06280	1
Hydrophobin	PF06766	1
Protein of unknown function (DUF1237)	PF06824	1
Glyoxal oxidase N-terminus	PF07250	1
Protein of unknown function (DUF1524)	PF07510	1
Glycoside hydrolase family 92	PF07971	1
X8 domain	PF07983	1
Alpha/beta hydrolase fold	PF08386	1
SMP-30/Gluconolaconase/LRE-like region	PF08450	1
Domain of unknown function (DUF1793)	PF08760	1
Poly(beta-D-mannuronate) lyase	PF08787	1
Alpha-L-arabinofuranosidase B, catalytic	PF09206	1
Ubiquitin 3 binding protein But2 C-terminal domain	PF09792	1
Lactonase, 7-bladed beta-propeller	PF10282	1
Putative TOS1-like glycosyl hydrolase (DUF2401)	PF10287	1
Glycine-rich protein domain (DUF2403)	PF10290	1
GLEYA domain	PF10528	1
Protein of unknown function (DUF3500)	PF12006	1
Esterase-like activity of phytase	PF13449	1
GDSL-like Lipase/Acylhydrolase family	PF13472	1
SnoaL-like domain	PF13577	1
Galactose mutarotase-like	PF13802	1
Putative peptidase family	PF13933	1
Protein of unknown function (DUF4237)	PF14021	1
	Total PF domains in secretome

## Sheet: Table 5
B. cinerea secretome gene ID	Position of SP end	RXLR position	Function	secreted	gpi	aa1	prelen	siglen	maturelen	% C	numcs	numrs	TMs	TMpos	RADAR	WoLFPSORT	[HK]DEL	bipartite_NLS	NES	PFAM	KOG	CDD
BC1G_00750	44	512		Y	-	M	516	19	497	1.00604	5	18	0	--	2	extr=27	-	-	0	pfam00135,pfam07859	KOG1515,KOG1516,KOG4389	COG0657,COG2272,cd00312
BC1G_01923	21	213		Y	-	M	478	20	458	0.436681	2	14	0	--	3	extr=27	-	-	1	pfam00295	-	PLN02793
BC1G_02364	19	180		Y	-	M	777	18	759	0.527009	4	23	0	--	3	extr=21	-	-	0	pfam00933,pfam01915,pfam14310	-	COG1472,PLN03080,PRK15098
BC1G_03179	24	725		Y	-	M	783	19	764	0.78534	6	27	0	--	4	extr=24	-	-	0	pfam00933,pfam01915,pfam14310	-	COG1472,PLN03080,PRK15098
BC1G_03464	23	151		Y	-	M	444	22	422	2.60664	11	5	0	--	4	extr=27	-	-	0	pfam00295	-	PLN02155,PLN02188,PLN02218,PLN02793,PLN03003,PLN03010
BC1G_03560	19	36	hypothetical protein	Y	-	M	414	18	396	2.27273	9	11	0	--	3	extr=25	-	-	1	-	-	-
BC1G_05479	22	63	extracellular dioxygenase protein	Y	-	M	133	21	112	1.78571	2	14	0	--	2	extr=20	-	52--66	0	-	-	-
BC1G_05961	21	148		Y	-	M	278	20	258	2.32558	6	5	0	--	2	extr=23	-	-	0	pfam00295	-	PLN02155,PLN02188,PLN02218,PLN03003,PLN03010
BC1G_07110	21	801		Y	-	M	804	20	784	0.892857	7	26	0	--	2	extr=24	-	-	0	pfam00933,pfam01915,pfam14310	-	COG1472,PLN03080,PRK15098
BC1G_07149	20	25	carboxypeptidase d	Y	-	M	563	19	544	1.10294	6	15	0	--	3	extr=25	-	-	0	pfam00450	KOG1282,KOG1283	COG2939,PLN02209,PLN03016,PTZ00472
BC1G_07622	28	727		Y	-	M	786	27	759	0.922266	7	24	0	--	3	extr=26	-	-	1	pfam00933,pfam01915,pfam14310	-	COG1472,PLN03080,PRK15098
BC1G_10768	22	75	dioxygenase	Y	-	M	386	21	365	1.09589	4	16	0	--	2	extr=26	-	-	0	pfam00775	-	COG3485,cd00421,cd03457,cd03458,cd03459,cd03460,cd03461,cd03463
BC1G_11439	23	576		Y	-	M	641	21	620	0.967742	6	22	0	--	3	extr=27	-	-	0	pfam00933,pfam01915,pfam14310	-	COG1472,PRK15098
BC1G_12157	20	333		Y	-	M	398	19	379	0.791557	3	17	0	--	2	extr=22	-	-	0	pfam00491	KOG2964,KOG2965	COG0010,PLN02615,PRK01722,PRK02190,PRK13773,TIGR01227,TIGR01229,TIGR01230
BC1G_12343	17	60	subtilisin-like protease protein	Y	-	M	932	16	916	0.545852	5	23	0	--	3	extr=27	-	-	0	pfam00082,pfam06280	-	PTZ00262,TIGR03921,cd00306,cd04077,cd04842,cd04848,cd04852,cd05561,cd05562,cd07473,cd07474,cd07475,cd07477,cd07478,cd07480,cd07481,cd07482,cd07483,cd07484,cd07485,cd07487,cd07489,cd07490,cd07496,cd07498
BC1G_12732	23	39	predicted protein	Y	-	M	143	22	121	2.47934	3	11	0	--	-	extr=18	-	-	0	-	-	-
BC1G_13938	19	344		Y	-	M	384	18	366	0	0	9	0	--	5	extr=26	-	-	0	-	-	-
BC1G_14398	18	279		Y	-	M	331	17	314	2.2293	7	14	0	--	2	extr=24	-	-	0	pfam01266	KOG3923	TIGR02352
RXLR motif in close proximity to signal peptide (SP)

## Sheet: Table 6
B. cinerea secretome gene ID	Position of SP end	position of Y/F/WxC motif	secreted	gpi	aa1	prelen	siglen	maturelen	% C	numcs	numrs	TMs	TMpos	RADAR	WoLFPSORT	[HK]DEL	bipartite_NLS	NES	PFAM	KOG	CDD	Blast2GO annotation
BC1G_01204	17	36	Y	-	M	816	16	800	4	32	20	0	--	4	extr=27	-	-	1	pfam00187,pfam07250,pfam09118	-	cd00035,cd02851,cd11618,smart00270	carbohydrate-binding module family 18 protein
BC1G_01874	22	29	Y	-	M	496	21	475	1.89474	9	11	0	--	3	extr=22	-	-	0	pfam10287,pfam10290	-	-	protein tos1 precursor
BC1G_03591	19	35	Y	-	M	81	18	63	9.52381	6	3	0	--	-	extr=19	-	-	0	-	-	-
BC1G_04280	21	31	Y	-	M	61	20	41	7.31707	3	1	0	--	-	extr=21	-	-	0	-	-	-
BC1G_06815	22	30	Y	-	M	933	21	912	2.96053	27	5	0	--	10	extr=25	-	-	0	-	-	-
BC1G_07073	18	31	Y	-	M	221	17	204	1.96078	4	2	0	--	3	extr=26	-	-	0	pfam11937	-	-
BC1G_09791	19	36	Y	-	M	454	18	436	0.917431	4	10	0	--	3	extr=27	-	-	1	-	-	-	prolyl aminopeptidase (secreted protein)
BC1G_12747	21	40	Y	-	M	106	20	86	9.30233	8	1	0	--	2	extr=25	-	-	1	-	-	-
BC1G_13714	17	29	Y	-	M	423	16	407	1.9656	8	16	0	--	2	extr=26	-	-	0	pfam00135	KOG1515,KOG1516,KOG4389	COG0657,COG2272,cd00312	carboxylesterase protein
BC1G_13862	21	32	Y	-	M	355	20	335	4.47761	15	3	0	--	3	extr=26	-	-	0	pfam02015	-	-	glycoside hydrolase family 45 protein
BC1G_14481	21	35	Y	-	M	251	20	231	3.4632	8	3	0	--	3	extr=26	-	-	0	-	-	-	candidate effector 5 protein
Small cysteine-rich unannotated proteins

## Sheet: Table 7
Proteins with >5% cysteines	secreted	gpi	aa1	prelen	siglen	maturelen	% C	numcs	numrs	TMs	TMpos	RADAR	WoLFPSORT	[HK]DEL	bipartite_NLS	NES	PFAM	KOG	CDD
BC1G_01012	Y	-	M	98	18	80	10	8	3	0	--	2	extr=20	-	-	0	pfam06766 (hydrophobin)	-	-
BC1G_01444	Y	-	M	90	20	70	14.2857	10	2	0	--	2	extr=25	-	-	0	-	-	-
BC1G_02643	Y	-	M	141	19	122	6.55738	8	3	0	--	-	extr=25	-	-	0	-	-	-
BC1G_02676	Y	-	M	127	25	102	7.84314	8	5	0	--	-	extr=27	-	-	1	-	-	-
BC1G_02701	Y	-	M	139	22	117	8.54701	10	2	0	--	2	extr=22	-	-	0	-	-	-
BC1G_02834	Y	-	M	170	19	151	5.29801	8	3	0	--	-	extr=19	-	-	0	-	-	-
BC1G_03591	Y	-	M	81	18	63	9.52381	6	3	0	--	-	extr=19	-	-	0	-	-	-
BC1G_04280	Y	-	M	61	20	41	7.31707	3	1	0	--	-	extr=21	-	-	0	-	-	-
BC1G_04506	Y	-	M	105	21	84	15.4762	13	1	0	--	2	extr=27	-	-	1	-	-	-
BC1G_04521	Y	-	M	167	24	143	5.59441	8	4	0	--	3	extr=25	-	-	1	-	-	-
BC1G_04660	Y	-	M	154	22	132	6.06061	8	0	0	--	2	extr=26	-	-	0	-	-	-
BC1G_05134	Y	-	M	147	19	128	6.25	8	1	0	--	2	extr=25	-	-	0	-	-	-
BC1G_05866	Y	-	M	109	22	87	6.89655	6	4	0	--	-	extr=24	-	-	0	-	-	-
BC1G_06019	Y	-	M	139	18	121	5.78512	7	2	0	--	2	extr=22	-	-	1	-	-	-
BC1G_07175	Y	-	M	103	20	83	7.22892	6	1	0	--	-	extr=27	-	-	1	-	-	-
BC1G_07611	Y	-	M	90	17	73	10.9589	8	3	0	--	-	extr=20	-	-	0	-	-	-
BC1G_08363	Y	-	M	96	18	78	12.8205	10	0	0	--	-	extr=26	-	-	0	-	-	-
BC1G_09084	Y	-	M	139	17	122	6.55738	8	1	0	--	2	extr=24	-	-	1	-	-	-
BC1G_09968	Y	-	M	163	23	140	5	7	4	0	--	-	extr=23	-	-	0	-	-	-
BC1G_11403	Y	-	M	114	19	95	9.47368	9	2	0	--	2	extr=27	-	-	1	-	-	-
BC1G_11503	Y	-	M	100	20	80	7.5	6	1	0	--	-	extr=22	-	-	0	-	-	-
BC1G_12169	Y	-	M	137	18	119	5.04202	6	3	0	--	2	extr=23	-	-	0	-	-	-
BC1G_12747	Y	-	M	106	20	86	9.30233	8	1	0	--	2	extr=25	-	-	1	-	-	-
BC1G_13879	Y	-	M	84	16	68	11.7647	8	4	0	--	-	extr=22	-	-	0	-	-	-
BC1G_15646	Y	-	M	200	20	180	6.11111	11	4	0	--	-	extr=19	-	-	1	-	-	-
BC1G_16107	Y	-	M	96	20	76	13.1579	10	2	0	--	3	extr=24	-	-	0	-	-	-
